# Supplementary material for: Whole blood transcriptome analysis in ewes fed with hemp seed supplemented diet
Source: PubMed Central journal article supplement (PMC6838114; doi:10.1038/s41598-019-52712-6), 2019-11-07
Supplement: 41598_2019_52712_MOESM1_ESM.pdf [file 41598_2019_52712_MOESM1_ESM.pdf]

## **Whole blood transcriptome analysis in ewes fed with hemp seed supplemented diet**

Marco Iannaccone<sup>1†</sup>, Andrea Ianni<sup>1†</sup>, Felice Contaldi<sup>2</sup>, Salvatore Esposito<sup>2</sup>, Camillo Martino<sup>3</sup>,  
Francesca Bennato<sup>1</sup>, Elisabetta De Angelis<sup>1</sup>, Lisa Grotta<sup>1</sup>, Francesco Pomilio<sup>3</sup>, Daniele Giansante<sup>3</sup>,  
Giuseppe Martino<sup>1,\*</sup>

<sup>1</sup>Faculty of Bioscience and Technology for Food, Agriculture, and Environment, University of  
Teramo, Via R. Balzarini 1, 64100 Teramo, Italy.

<sup>2</sup>CREA, Via Cavallegeri, 25, 84098 Pontecagnano Salerno, Italy

<sup>3</sup>Istituto Zooprofilattico Sperimentale dell'Abruzzo e del Molise "G. Caporale" Via Campo Boario –  
64100 Teramo (TE), Italy

<sup>†</sup>These authors contributed equally to this work

\*Corresponding author. [gmartino@unite.it](mailto:gmartino@unite.it) (G. Martino).

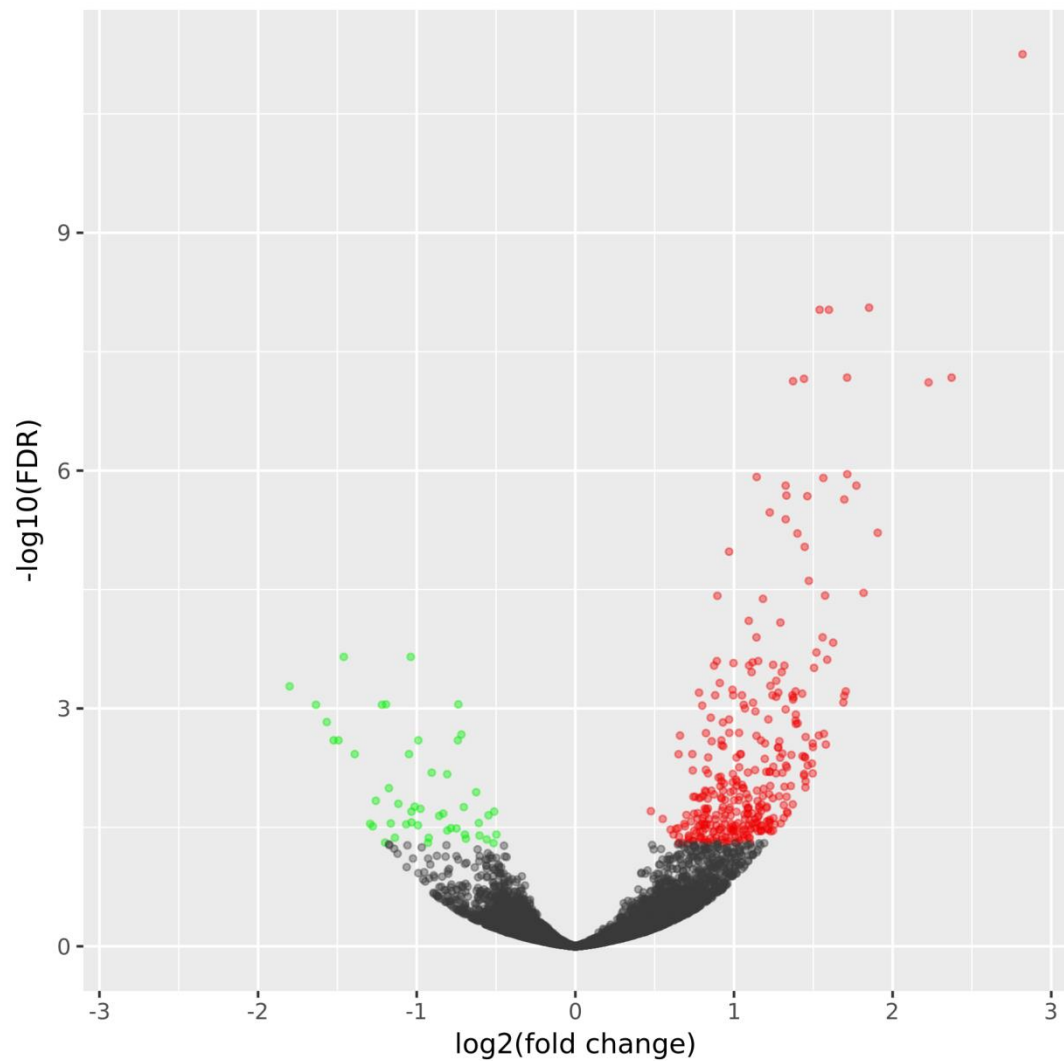

**Supplementary figure 1.** Volcano plot chart. The Volcano plot shows the relationship between the fold-change (on the X-axis) and the significance of the differential expression test (Y-axis) for each gene in the genome. Black dots represent the genes that are not significantly differentially expressed, while red and green dots are the genes that are significantly UP- and DOWN-regulated, respectively.

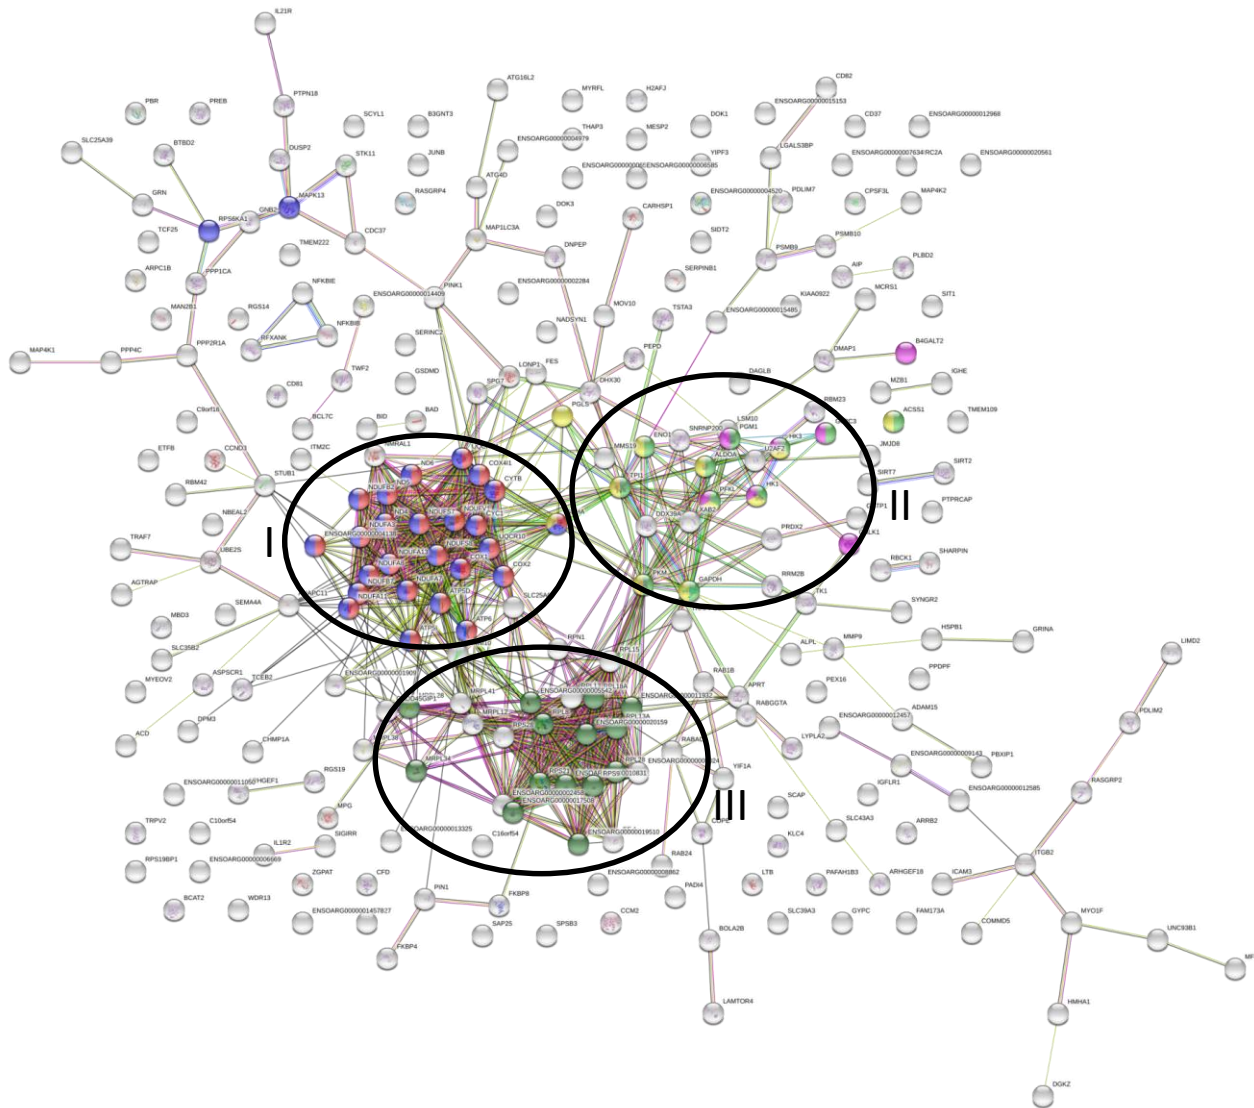

**Supplementary figure 1. Protein-protein interaction generated using the 270 up-regulated genes at the end of supplementation time with HS.** DEGs clusterize mainly in 3 different groups: I includes genes belonging to oxidative phosphorylation and thermogenesis (blu and red coloured circles); II includes genes belonging to glycolysis/gluconeogenesis ( $3.92e-08$ ), galactose metabolism and carbon metabolism pathways (yellow, light green and violet coloured circles); III includes gene belonging to ribosome activity (dark green coloured circles). Details of all genes included in the 3 groups are reported in table 1.

OXIDATIVE PHOSPHORYLATION

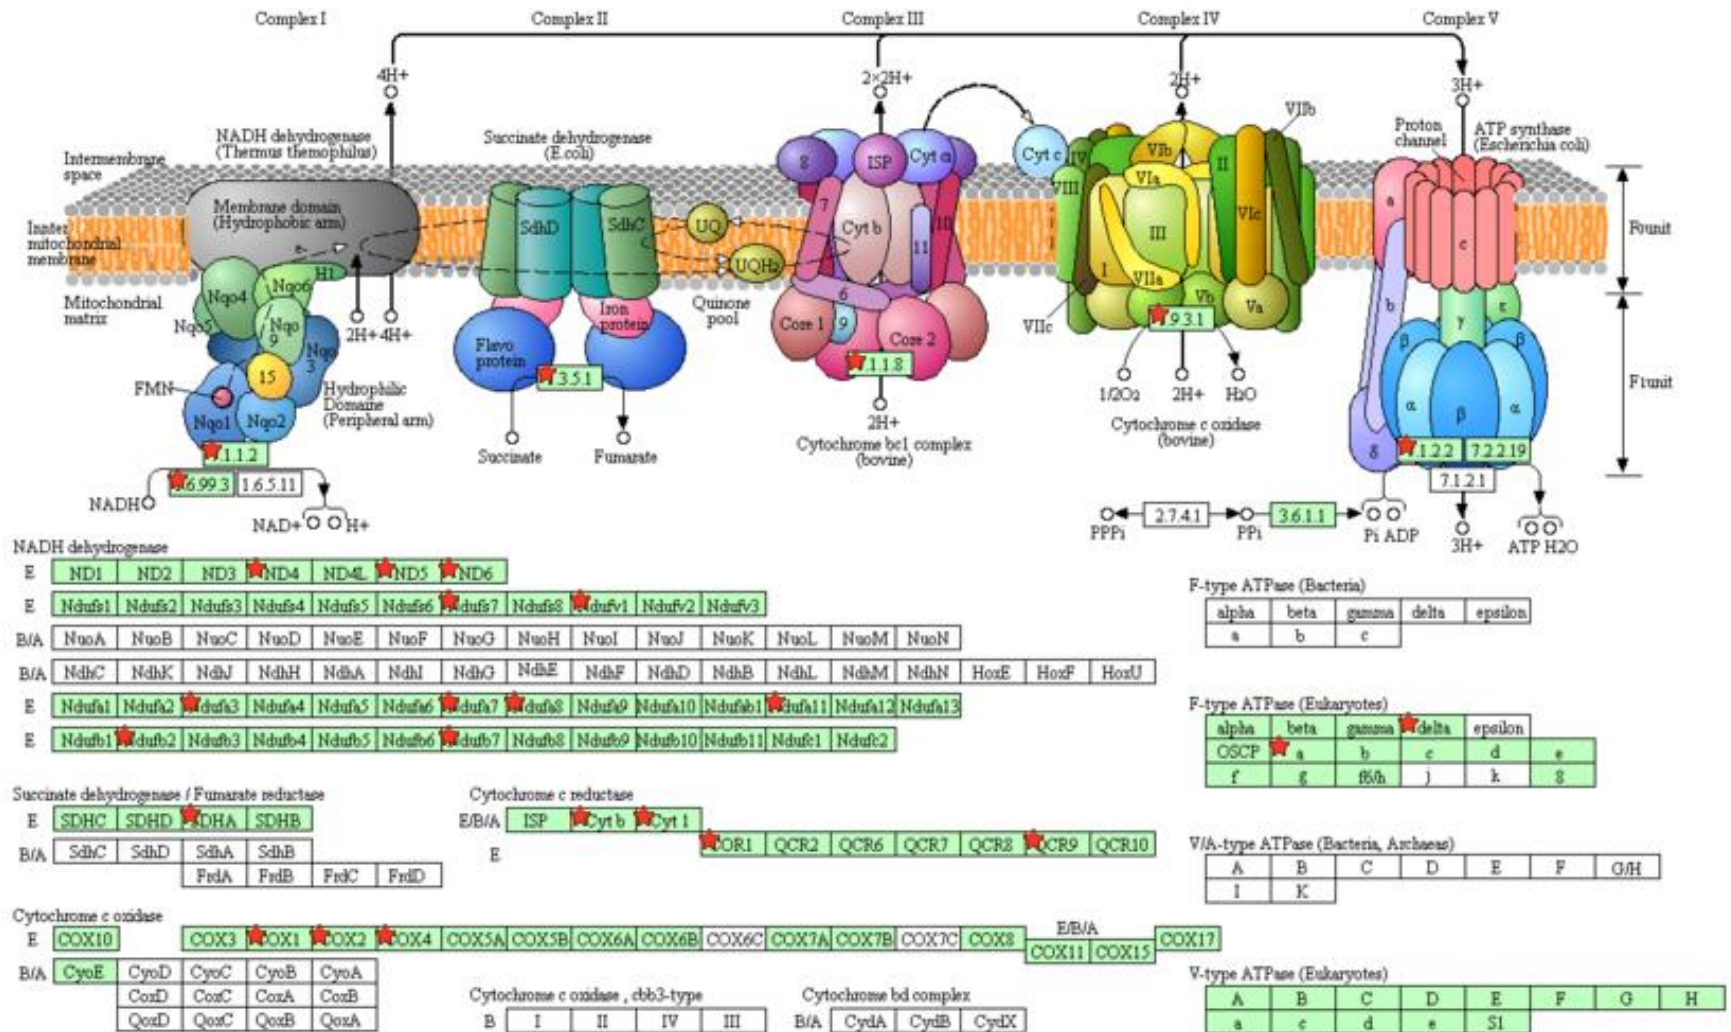

**Supplemental figure 1.** Schematic diagram of oxidative phosphorylation which includes electron transport chain and ATP synthesis. All genes upregulated by hemp seed supplementation have been indicated with a red star.

**Supplementary table 1.** List of all differentially expressed genes (FDR<0.05) in the HSG group compared to CTRL group following 30 days of hemp seed supplementation. Down-regulated genes are highlighted in green while up-regulated genes are highlighted in red.

| Gene_ID            | Gene symbol  | log2FC | pvalue   | FDR      | Chromosome |
|--------------------|--------------|--------|----------|----------|------------|
| ENSOARG00000013378 | GLIS3        | -6.46  | 8.10E-09 | 9.52E-06 | 2          |
| ENSOARG00000020724 | MGP          | -3.06  | 1.37E-03 | 4.94E-02 | 3          |
| ENSOARG00000015299 | LOC101104054 | -2.77  | 8.50E-06 | 1.64E-03 | 3          |
| ENSOARG00000002356 | RARRES1      | -2.70  | 6.64E-07 | 2.55E-04 | 1          |
| ENSOARG00000009775 | LOC101123341 | -2.58  | 6.06E-05 | 6.22E-03 | 1          |
| ENSOARG00000001914 | ABCG2        | -2.31  | 8.98E-06 | 1.67E-03 | 6          |
| ENSOARG00000010617 | SGIP1        | -2.30  | 2.11E-06 | 5.94E-04 | 1          |
| ENSOARG00000001941 | LOC101110458 | -2.28  | 3.78E-04 | 2.17E-02 | 20         |
| ENSOARG00000014496 | CXCL8        | -2.07  | 7.73E-04 | 3.46E-02 | 6          |
| ENSOARG00000002463 | LXN          | -1.88  | 5.26E-07 | 2.22E-04 | 1          |
| ENSOARG00000011975 | MOB1B        | -1.78  | 9.61E-06 | 1.67E-03 | 6          |
| ENSOARG00000000421 | BEX4         | -1.75  | 6.01E-04 | 2.96E-02 |            |
| ENSOARG00000001633 | -            | -1.73  | 7.37E-04 | 3.35E-02 | X          |
| ENSOARG00000004954 | RAB27B       | -1.70  | 5.54E-04 | 2.78E-02 | 23         |
| ENSOARG00000006648 | DPM3         | -1.68  | 2.84E-04 | 1.76E-02 | 1          |
| ENSOARG00000020985 | LOC105613001 | -1.53  | 2.66E-04 | 1.69E-02 | 3          |
| ENSOARG00000009306 | DOCK7        | -1.53  | 1.86E-04 | 1.35E-02 | 1          |
| ENSOARG00000020266 | TTF2         | -1.47  | 2.63E-07 | 1.30E-04 | 1          |
| ENSOARG00000001101 | GNG11        | -1.45  | 4.74E-04 | 2.54E-02 | 4          |
| ENSOARG00000004402 | DYNLT1       | -1.42  | 2.73E-05 | 3.42E-03 | 8          |
| ENSOARG00000021041 | C7H15orf48   | -1.36  | 3.50E-04 | 2.07E-02 | 7          |
| ENSOARG00000003293 | PDGFD        | -1.34  | 1.04E-04 | 8.87E-03 | 15         |
| ENSOARG00000023519 | -            | -1.33  | 7.93E-04 | 3.49E-02 | 7          |
| ENSOARG00000014852 | BBS10        | -1.33  | 4.95E-04 | 2.58E-02 | 3          |
| ENSOARG00000017989 | -            | -1.32  | 1.15E-03 | 4.40E-02 | 25         |
| ENSOARG00000019914 | -            | -1.20  | 2.30E-06 | 6.27E-04 | 3          |
| ENSOARG00000000017 | -            | -1.20  | 2.91E-04 | 1.79E-02 | MT         |
| ENSOARG00000019055 | NPL          | -1.14  | 5.50E-04 | 2.78E-02 | 12         |
| ENSOARG00000009068 | RSU1         | -1.14  | 1.09E-03 | 4.18E-02 | 13         |

|                     |              |       |          |          |    |
|---------------------|--------------|-------|----------|----------|----|
| ENSOARG00000001883  | NMD3         | -1.07 | 2.33E-05 | 3.06E-03 | 1  |
| ENSOARG00000013732  | ARHGAP18     | -1.06 | 8.83E-04 | 3.67E-02 | 8  |
| ENSOARG00000006919  |              | -0.95 | 7.99E-04 | 3.49E-02 |    |
| ENSOARG00000009414  | ATP2C1       | -0.93 | 6.32E-04 | 3.04E-02 | 1  |
| ENSOARG00000002409  | GFM1         | -0.91 | 4.38E-05 | 4.79E-03 | 1  |
| ENSOARG00000007240  | EFR3A        | -0.86 | 1.35E-03 | 4.90E-02 | 9  |
| ENSOARG00000016837  | -            | -0.85 | 1.35E-03 | 4.90E-02 | 11 |
| ENSOARG000000021027 | MYEF2        | -0.82 | 1.26E-03 | 4.66E-02 | 7  |
| ENSOARG00000000764  | -            | -0.80 | 4.01E-04 | 2.29E-02 | 7  |
| ENSOARG00000009351  | -            | -0.80 | 4.30E-04 | 2.39E-02 | 4  |
| ENSOARG00000008878  | CD84         | -0.79 | 1.37E-03 | 4.94E-02 | 1  |
| ENSOARG00000015472  | C3H12orf29   | -0.78 | 1.26E-03 | 4.66E-02 | 3  |
| ENSOARG00000020715  | RMND5A       | -0.76 | 4.60E-04 | 2.47E-02 | 3  |
| ENSOARG00000020662  | DCUN1D1      | -0.76 | 8.72E-04 | 3.67E-02 | 1  |
| ENSOARG00000005428  | TPI1         | 0.57  | 3.47E-04 | 2.81E-03 | 3  |
| ENSOARG00000011503  | LOC101105179 | 0.59  | 4.86E-06 | 3.28E-04 | 14 |
| ENSOARG00000000016  | COX1         | 0.65  | 2.60E-06 | 2.47E-04 | MT |
| ENSOARG00000013450  | NDUFB2       | 0.66  | 4.69E-06 | 3.25E-03 | 4  |
| ENSOARG00000009826  | PGM1         | 0.72  | 3.84E-04 | 2.94E-03 | 1  |
| ENSOARG00000011318  | PPP1CA       | 0.74  | 8.70E-04 | 3.67E-02 | 21 |
| ENSOARG00000005491  | HK1          | 0.74  | 2.71E-05 | 7.36E-04 | 25 |
| ENSOARG00000005491  | RPLP2        | 0.74  | 2.71E-05 | 7.36E-04 | 21 |
| ENSOARG00000014457  | -            | 0.77  | 7.16E-04 | 3.30E-02 | 5  |
| ENSOARG00000004100  | PPP4C        | 0.80  | 1.29E-04 | 1.04E-02 | 24 |
| ENSOARG00000000035  | CYTB         | 0.81  | 4.55E-05 | 9.54E-02 | MT |
| ENSOARG00000000531  | ARHGEF18     | 0.82  | 1.17E-03 | 4.43E-02 | 5  |
| ENSOARG00000019733  | MOV10        | 0.83  | 4.85E-04 | 2.57E-02 | 1  |
| ENSOARG00000011932  | RPL18        | 0.84  | 4.12E-04 | 2.31E-02 | 14 |
| ENSOARG00000000685  | B4GALT2      | 0.85  | 4.31E-04 | 3.12E-03 | 1  |
| ENSOARG00000014386  | NDUFA8       | 0.86  | 4.97E-05 | 9.88E-02 | 3  |
| ENSOARG00000007894  | GAPDH        | 0.90  | 2.96E-04 | 2.63E-03 | 3  |
| ENSOARG00000007797  | ARRB2        | 0.90  | 3.75E-04 | 2.17E-02 | 11 |
| ENSOARG00000005542  | LOC101108778 | 0.90  | 1.40E-03 | 5.00E-02 | 17 |



|                    |          |      |          |          |    |
|--------------------|----------|------|----------|----------|----|
| ENSOARG00000016615 | -        | 0.91 | 2.18E-04 | 1.51E-02 | 3  |
| ENSOARG00000018886 | PARP6    | 0.93 | 2.27E-05 | 6.57E-04 | 7  |
| ENSOARG00000002728 | PEX16    | 0.94 | 1.41E-03 | 5.00E-02 | 15 |
| ENSOARG00000004384 | RPS6KA1  | 0.94 | 7.96E-04 | 3.49E-02 | 2  |
| ENSOARG00000015019 | -        | 0.95 | 6.23E-04 | 3.03E-02 | 5  |
| ENSOARG00000015619 | SDHA     | 0.96 | 2.20E-06 | 6.48E-02 | 16 |
| ENSOARG00000012645 | RPL8     | 0.96 | 5.27E-05 | 5.46E-03 | 9  |
| ENSOARG00000013126 | RPS21    | 0.97 | 1.33E-03 | 4.87E-02 | 13 |
| ENSOARG00000017788 | SIRT7    | 0.99 | 7.04E-04 | 3.28E-02 | 11 |
| ENSOARG00000003683 | NDUFA7   | 0.99 | 1.89E-05 | 2.09E-04 | 5  |
| ENSOARG00000009989 | MAP1LC3A | 0.99 | 9.14E-04 | 3.73E-02 | 13 |
| ENSOARG00000000129 | EEF1D    | 1.00 | 8.55E-06 | 1.64E-03 | 9  |
| ENSOARG00000008574 | RASGRP2  | 1.00 | 6.57E-04 | 3.13E-02 | 21 |
| ENSOARG00000012384 | MAN2B1   | 1.01 | 1.56E-04 | 1.19E-02 | 5  |
| ENSOARG00000003523 | RAB1B    | 1.04 | 9.47E-04 | 3.78E-02 | 21 |
| ENSOARG00000010800 | PRDX2    | 1.04 | 3.91E-05 | 4.43E-03 | 5  |
| ENSOARG00000015922 | ICAM3    | 1.04 | 8.25E-04 | 3.57E-02 | 5  |
| ENSOARG00000003182 | CD81     | 1.04 | 3.50E-04 | 2.07E-02 | 21 |
| ENSOARG00000010995 | -        | 1.05 | 8.26E-04 | 3.57E-02 | 13 |
| ENSOARG00000003599 | -        | 1.05 | 7.99E-04 | 3.49E-02 | 24 |
| ENSOARG00000009538 | ENO1     | 1.06 | 2.05E-06 | 5.94E-04 | 12 |
| ENSOARG00000000032 | ND5      | 1.06 | 1.42E-04 | 1.11E-02 | MT |
| ENSOARG00000002458 | RPSA     | 1.06 | 9.08E-06 | 1.67E-03 | 19 |
| ENSOARG00000012838 | DOK1     | 1.08 | 6.16E-04 | 3.01E-02 | 3  |
| ENSOARG00000011944 | SIT1     | 1.08 | 1.67E-04 | 1.25E-02 | 2  |
| ENSOARG00000005744 | MAP4K1   | 1.09 | 9.41E-04 | 3.77E-02 | 14 |
| ENSOARG00000007866 | PSMB9    | 1.09 | 1.33E-06 | 4.37E-04 | 20 |
| ENSOARG00000008259 | LTB      | 1.09 | 6.35E-05 | 6.46E-03 | 20 |
| ENSOARG00000007749 | -        | 1.09 | 2.36E-04 | 1.58E-02 | 5  |
| ENSOARG00000018702 | MCRS1    | 1.09 | 1.16E-03 | 4.40E-02 | 3  |
| ENSOARG00000013949 | SNRNP200 | 1.10 | 1.08E-04 | 9.01E-03 | 3  |
| ENSOARG00000012851 | CD37     | 1.10 | 5.02E-05 | 5.30E-03 | 14 |
| ENSOARG00000000019 | COX2     | 1.10 | 6.06E-05 | 1.13E-03 | MT |

|                    |                            |      |          |          |    |
|--------------------|----------------------------|------|----------|----------|----|
| ENSOARG00000003628 | YIF1A                      | 1.11 | 1.41E-04 | 1.11E-02 | 21 |
| ENSOARG00000014733 | ETFB; VSIG10L              | 1.12 | 9.00E-07 | 3.11E-04 | 14 |
| ENSOARG00000011357 | FKBP4                      | 1.12 | 7.35E-04 | 3.35E-02 | 3  |
| ENSOARG00000004926 | RBM42                      | 1.12 | 1.32E-04 | 1.06E-02 | 14 |
| ENSOARG00000018221 | -                          | 1.12 | 3.70E-04 | 2.16E-02 | 11 |
| ENSOARG00000002284 | LRRC41                     | 1.13 | 6.82E-04 | 3.21E-02 | 1  |
| ENSOARG00000004207 | MYO1F                      | 1.15 | 4.03E-04 | 2.29E-02 | 5  |
| ENSOARG00000025944 | -                          | 1.15 | 7.44E-05 | 7.42E-03 | 3  |
| ENSOARG00000007926 | PAFAH1B3                   | 1.15 | 1.36E-03 | 4.91E-02 | 14 |
| ENSOARG00000003453 | NMRAL1                     | 1.15 | 8.45E-04 | 3.61E-02 | 24 |
| ENSOARG00000002311 | SERPINB1                   | 1.15 | 9.22E-04 | 3.73E-02 | 20 |
| ENSOARG00000004143 | ALDOA                      | 1.16 | 8.12E-05 | 1.33E-03 | 24 |
| ENSOARG00000007420 | YIPF3                      | 1.16 | 9.24E-04 | 3.73E-02 | 20 |
| ENSOARG00000003243 | PSMB10                     | 1.17 | 3.97E-05 | 4.43E-03 | 14 |
| ENSOARG00000015485 | LOC101108696               | 1.17 | 1.39E-05 | 2.07E-03 | 20 |
| ENSOARG00000004090 | -                          | 1.17 | 3.00E-04 | 1.82E-02 | 19 |
| ENSOARG00000001369 | UBE2S                      | 1.18 | 8.50E-04 | 3.62E-02 | 14 |
| ENSOARG00000013443 | STUB1                      | 1.19 | 2.06E-04 | 1.45E-02 | 24 |
| ENSOARG00000013165 | -                          | 1.19 | 8.52E-07 | 3.05E-04 | 21 |
| ENSOARG00000009339 | LOC101105043A3; LOC1011050 | 1.20 | 1.17E-03 | 4.43E-02 | 15 |
| ENSOARG00000019141 | PREB                       | 1.20 | 9.47E-05 | 8.70E-03 | 3  |
| ENSOARG00000013373 | -                          | 1.21 | 8.01E-04 | 3.49E-02 | 24 |
| ENSOARG00000002381 | TMEM131L                   | 1.22 | 1.59E-05 | 2.26E-03 | 17 |
| ENSOARG00000005003 | IGFLR1                     | 1.23 | 1.40E-04 | 1.11E-02 | 14 |
| ENSOARG00000015829 | PTPN18                     | 1.23 | 9.60E-05 | 8.74E-03 | 2  |
| ENSOARG00000017713 | TRAF7                      | 1.25 | 1.33E-03 | 4.87E-02 | 24 |
| ENSOARG00000003866 | SIDT2                      | 1.25 | 4.79E-04 | 2.55E-02 | 15 |
| ENSOARG00000001428 | RPL28                      | 1.25 | 3.44E-08 | 2.55E-05 | 14 |
| ENSOARG00000012489 | AIP                        | 1.25 | 1.22E-03 | 4.55E-02 | 21 |
| ENSOARG00000016897 | TRPV2                      | 1.26 | 6.91E-05 | 6.96E-03 | 11 |
| ENSOARG00000005746 | SYNGR2                     | 1.27 | 1.32E-03 | 4.86E-02 | 11 |
| ENSOARG00000000033 | ND6                        | 1.28 | 3.85E-05 | 4.43E-03 | MT |
| ENSOARG00000007553 | PLBD2                      | 1.28 | 8.37E-04 | 3.60E-02 | 17 |



|                    |              |      |          |          |    |
|--------------------|--------------|------|----------|----------|----|
| ENSOARG00000013388 | LIMD2        | 1.29 | 3.05E-05 | 3.73E-03 | 11 |
| ENSOARG00000003252 | HK3          | 1.30 | 1.06E-03 | 4.10E-02 | 5  |
| ENSOARG00000014174 | CCM2         | 1.30 | 3.96E-05 | 4.43E-03 | 4  |
| ENSOARG00000005475 | KLC4         | 1.30 | 5.04E-04 | 2.60E-02 | 20 |
| ENSOARG00000000022 | ATP6         | 1.31 | 4.07E-04 | 2.30E-02 | MT |
| ENSOARG00000013519 | -            | 1.31 | 2.77E-06 | 7.19E-04 | 3  |
| ENSOARG00000020159 | LOC101109545 | 1.32 | 2.30E-04 | 1.56E-02 | 9  |
| ENSOARG00000017239 | MRPL34       | 1.33 | 8.42E-04 | 3.61E-02 | 5  |
| ENSOARG00000011366 | ATP5F1D      | 1.33 | 1.84E-04 | 1.35E-02 | 5  |
| ENSOARG00000013629 | SLC39A3      | 1.33 | 8.73E-04 | 3.67E-02 | 5  |
| ENSOARG00000013006 | MAPK13       | 1.33 | 1.62E-04 | 1.23E-02 | 20 |
| ENSOARG00000006739 | VSIR         | 1.34 | 1.29E-04 | 1.74E-03 | 25 |
| ENSOARG00000017479 | LAMTOR4      | 1.35 | 1.28E-05 | 2.01E-03 | 24 |
| ENSOARG00000004122 | RAB24        | 1.35 | 1.21E-05 | 1.94E-03 | 5  |
| ENSOARG00000003076 | NDUFA3       | 1.36 | 6.21E-05 | 1.15E-03 | 14 |
| ENSOARG00000013457 | PIN1         | 1.36 | 4.69E-06 | 1.04E-03 | 5  |
| ENSOARG00000016351 | PGLS         | 1.36 | 3.00E-04 | 1.82E-02 | 5  |
| ENSOARG00000007658 | PRRC2A       | 1.37 | 6.25E-04 | 3.03E-02 | 20 |
| ENSOARG00000005975 | BAD          | 1.37 | 9.94E-05 | 8.80E-03 | 21 |
| ENSOARG00000005380 | -            | 1.37 | 7.02E-04 | 3.28E-02 | 5  |
| ENSOARG00000003257 | LGALS3BP     | 1.37 | 2.50E-04 | 1.65E-02 | 11 |
| ENSOARG00000009235 | RFXANK       | 1.37 | 2.01E-04 | 1.42E-02 | 5  |
| ENSOARG00000014412 | NDUFS8       | 1.38 | 3.16E-05 | 3.77E-03 | 21 |
| ENSOARG00000012367 | ITGB2        | 1.38 | 3.58E-06 | 9.07E-04 | 1  |
| ENSOARG00000015048 | LOC101113599 | 1.38 | 5.36E-08 | 3.71E-05 | 9  |
| ENSOARG00000006883 | KIF2A        | 1.38 | 3.78E-04 | 2.17E-02 | 16 |
| ENSOARG00000010851 | -            | 1.39 | 1.96E-04 | 1.41E-02 | 3  |
| ENSOARG00000017984 | LOC101121062 | 1.39 | 2.85E-04 | 1.76E-02 | 25 |
| ENSOARG00000011242 | STK11        | 1.41 | 1.00E-03 | 3.98E-02 | 5  |
| ENSOARG00000009596 | LSM10        | 1.41 | 1.04E-04 | 8.87E-03 | 1  |
| ENSOARG00000018731 | ARPC1B       | 1.41 | 4.71E-06 | 1.04E-03 | 24 |
| ENSOARG00000018014 | RRM2B        | 1.41 | 2.34E-04 | 1.57E-02 | 9  |
| ENSOARG00000005411 | NDUFB7       | 1.42 | 1.40E-05 | 2.07E-03 | 5  |

|                    |              |      |          |          |    |
|--------------------|--------------|------|----------|----------|----|
| ENSOARG00000016156 | CDC37        | 1.43 | 9.29E-04 | 3.74E-02 | 5  |
| ENSOARG00000008352 | ARHGEF1      | 1.44 | 2.60E-04 | 1.66E-02 | 14 |
| ENSOARG00000001909 | -            | 1.44 | 1.00E-05 | 1.70E-03 | 1  |
| ENSOARG00000009445 | -            | 1.45 | 3.10E-05 | 3.75E-03 | 20 |
| ENSOARG00000006493 | LONP1        | 1.45 | 2.71E-04 | 1.69E-02 | 5  |
| ENSOARG00000012585 | -            | 1.46 | 2.18E-08 | 1.74E-05 | 17 |
| ENSOARG00000016621 | TSTA3        | 1.46 | 5.25E-04 | 2.70E-02 | 9  |
| ENSOARG00000010436 | MMS19        | 1.47 | 4.90E-04 | 2.57E-02 | 22 |
| ENSOARG00000001792 | CD82         | 1.47 | 1.02E-03 | 4.01E-02 | 15 |
| ENSOARG00000010422 | COPE         | 1.47 | 7.73E-08 | 4.72E-05 | 5  |
| ENSOARG00000026908 | -            | 1.48 | 9.16E-04 | 3.73E-02 | 14 |
| ENSOARG00000014268 | CHMP1A       | 1.48 | 2.30E-04 | 1.56E-02 | 14 |
| ENSOARG00000014886 | SCYL1        | 1.49 | 3.42E-05 | 3.99E-03 | 21 |
| ENSOARG00000016785 | RPS19BP1     | 1.50 | 9.44E-06 | 1.67E-03 | 3  |
| ENSOARG00000020262 | LOC101107687 | 1.51 | 4.62E-06 | 1.04E-03 | 3  |
| ENSOARG00000009126 | -            | 1.51 | 1.14E-04 | 9.49E-03 | 2  |
| ENSOARG00000019398 | RBM23        | 1.51 | 1.53E-04 | 1.17E-02 | 7  |
| ENSOARG00000008293 | RABAC1       | 1.52 | 8.99E-05 | 8.40E-03 | 14 |
| ENSOARG00000004484 | RGS14        | 1.52 | 6.97E-07 | 2.59E-04 | 5  |
| ENSOARG00000016718 | LOC101110095 | 1.52 | 8.96E-05 | 8.40E-03 | 19 |
| ENSOARG00000007922 | BCL7C        | 1.53 | 1.26E-03 | 4.66E-02 | 24 |
| ENSOARG00000009498 | NFKBIE       | 1.53 | 4.41E-04 | 2.43E-02 | 20 |
| ENSOARG00000020161 | DNPEP        | 1.53 | 4.02E-06 | 9.93E-04 | 2  |
| ENSOARG00000010834 | ARHGAP45     | 1.53 | 2.69E-04 | 1.69E-02 | 5  |
| ENSOARG00000005487 | -            | 1.54 | 1.20E-03 | 4.48E-02 | 24 |
| ENSOARG00000013074 | BTBD2        | 1.54 | 5.77E-04 | 2.86E-02 | 5  |
| ENSOARG00000014009 | -            | 1.54 | 2.65E-04 | 1.69E-02 | 3  |
| ENSOARG00000005857 | SIRT2        | 1.56 | 5.42E-04 | 2.77E-02 | 14 |
| ENSOARG00000013296 | NDUFV1       | 1.56 | 1.23E-05 | 1.69E-04 | 21 |
| ENSOARG00000009440 | MAP4K2       | 1.56 | 2.18E-04 | 1.51E-02 | 21 |
| ENSOARG00000019106 | RBCK1        | 1.58 | 1.31E-04 | 1.06E-02 | 13 |
| ENSOARG00000006624 | LOC101113085 | 1.58 | 2.48E-04 | 2.41E-03 | 11 |
| ENSOARG00000008892 | MRPL38       | 1.58 | 7.03E-04 | 3.28E-02 | 11 |

|                    |              |      |          |          |    |
|--------------------|--------------|------|----------|----------|----|
| ENSOARG00000002015 | XAB2         | 1.58 | 9.52E-04 | 3.78E-02 | 5  |
| ENSOARG00000004725 | INTS11       | 1.58 | 3.18E-04 | 1.91E-02 | 12 |
| ENSOARG00000014413 | LOC101117112 | 1.58 | 1.35E-06 | 4.37E-04 | 18 |
| ENSOARG00000007018 | NDUFA11      | 1.59 | 6.18E-07 | 2.46E-04 | 5  |
| ENSOARG00000000340 | ELOB         | 1.60 | 8.25E-09 | 9.52E-06 | 24 |
| ENSOARG00000009697 | GADD45GIP1   | 1.61 | 1.84E-04 | 1.35E-02 | 5  |
| ENSOARG00000000056 | -            | 1.61 | 6.62E-04 | 3.14E-02 | 12 |
| ENSOARG00000005883 | NFKBIB       | 1.62 | 5.06E-05 | 5.30E-03 | 14 |
| ENSOARG00000002753 | RPS9         | 1.62 | 1.31E-08 | 1.23E-05 | 14 |
| ENSOARG00000007146 | LYPLA2       | 1.63 | 2.22E-05 | 2.99E-03 | 2  |
| ENSOARG00000017094 | MZB1         | 1.64 | 1.48E-04 | 1.15E-02 | 5  |
| ENSOARG00000005024 | -            | 1.64 | 9.13E-05 | 8.46E-03 | 16 |
| ENSOARG00000007688 | -            | 1.65 | 4.26E-06 | 1.03E-03 | X  |
| ENSOARG00000011786 | MRPL28       | 1.65 | 1.26E-04 | 1.03E-02 | 24 |
| ENSOARG00000002093 | DAGLB        | 1.68 | 4.58E-06 | 1.04E-03 | 24 |
| ENSOARG00000006665 | LOC101103862 | 1.69 | 6.06E-06 | 1.31E-03 | 23 |
| ENSOARG00000005579 | RASGRP4      | 1.69 | 7.98E-06 | 1.62E-03 | 14 |
| ENSOARG00000017508 | LOC101102096 | 1.70 | 1.56E-07 | 8.52E-05 | 20 |
| ENSOARG00000020146 | COMMD5       | 1.70 | 2.66E-05 | 3.36E-03 | 9  |
| ENSOARG00000004138 | LOC106991840 | 1.70 | 1.73E-08 | 1.50E-05 | 21 |
| ENSOARG00000015553 | GRINA        | 1.70 | 2.42E-05 | 3.14E-03 | 9  |
| ENSOARG00000010687 | MPG          | 1.70 | 9.33E-06 | 1.67E-03 | 24 |
| ENSOARG00000008258 | RGS19        | 1.70 | 5.58E-04 | 2.78E-02 | 13 |
| ENSOARG00000014409 | -            | 1.71 | 8.77E-04 | 3.67E-02 | 5  |
| ENSOARG00000011589 | NDUFS7       | 1.72 | 7.70E-05 | 7.61E-03 | 5  |
| ENSOARG00000020673 | ITM2C        | 1.74 | 4.16E-04 | 2.32E-02 | 2  |
| ENSOARG00000005673 | DDX39A       | 1.74 | 7.93E-04 | 3.49E-02 | 5  |
| ENSOARG00000002387 | LOC101123116 | 1.75 | 3.54E-07 | 1.60E-04 | 5  |
| ENSOARG00000012457 | -            | 1.76 | 1.00E-04 | 8.80E-03 | 17 |
| ENSOARG00000020232 | MYRFL        | 1.76 | 2.23E-04 | 1.53E-02 | 3  |
| ENSOARG00000012213 | WDR13        | 1.77 | 8.86E-04 | 3.67E-02 | X  |
| ENSOARG00000003098 | ACD          | 1.78 | 4.46E-04 | 2.43E-02 | 14 |
| ENSOARG00000005647 | TK1          | 1.79 | 2.53E-04 | 1.65E-02 | 11 |

|                    |              |      |          |          |    |
|--------------------|--------------|------|----------|----------|----|
| ENSOARG00000016386 | ATG4D        | 1.79 | 8.01E-05 | 7.84E-03 | 5  |
| ENSOARG00000009779 | CFD          | 1.79 | 2.57E-04 | 1.66E-02 | 5  |
| ENSOARG00000017798 | -            | 1.80 | 2.38E-04 | 1.58E-02 | X  |
| ENSOARG00000013159 | IL1R2        | 1.80 | 4.52E-04 | 2.45E-02 | 3  |
| ENSOARG00000003660 | TMEM222      | 1.80 | 6.31E-04 | 3.04E-02 | 2  |
| ENSOARG00000008086 | SLC25A39     | 1.80 | 2.45E-05 | 3.14E-03 | 11 |
| ENSOARG00000000028 | ND4          | 1.81 | 3.03E-06 | 7.80E-02 | MT |
| ENSOARG00000016272 | GNB2         | 1.82 | 2.43E-06 | 6.47E-04 | 24 |
| ENSOARG00000015153 | LOC101119773 | 1.82 | 7.62E-06 | 1.61E-03 | 1  |
| ENSOARG00000017643 | ASPCR1       | 1.84 | 5.81E-04 | 2.87E-02 | 11 |
| ENSOARG00000015049 | PPP2R1A      | 1.86 | 4.59E-05 | 4.96E-03 | 14 |
| ENSOARG00000006571 | LOC101103612 | 1.86 | 7.89E-06 | 1.62E-03 | 23 |
| ENSOARG00000003689 | RPS28        | 1.86 | 1.02E-05 | 1.70E-03 | 5  |
| ENSOARG00000005899 | TWF2         | 1.89 | 8.33E-05 | 8.08E-03 | 19 |
| ENSOARG00000014821 | TCF25        | 1.89 | 1.17E-05 | 1.90E-03 | 14 |
| ENSOARG00000015752 | -            | 1.89 | 1.57E-05 | 2.26E-03 | 21 |
| ENSOARG00000005753 | NBEAL2       | 1.91 | 8.12E-06 | 1.62E-03 | 19 |
| ENSOARG00000003881 | SCAP         | 1.92 | 7.16E-04 | 3.30E-02 | 19 |
| ENSOARG00000010128 | ZGPAT        | 1.92 | 1.86E-05 | 2.61E-03 | 13 |
| ENSOARG00000014024 | SPG7         | 1.95 | 3.57E-04 | 2.09E-02 | 14 |
| ENSOARG00000018872 | MRPL41       | 1.95 | 9.24E-04 | 3.73E-02 | 3  |
| ENSOARG00000013614 | FAM173A      | 1.96 | 1.39E-03 | 4.97E-02 | 24 |
| ENSOARG00000004556 | -            | 1.98 | 2.41E-09 | 4.16E-06 | 26 |
| ENSOARG00000002924 | CCND3        | 1.98 | 1.95E-07 | 1.01E-04 | 20 |
| ENSOARG00000010264 | PDLIM2       | 1.98 | 3.25E-05 | 3.83E-03 | 2  |
| ENSOARG00000012226 | BCAT2        | 1.98 | 5.47E-04 | 2.78E-02 | 14 |
| ENSOARG00000014140 | UNC93B1      | 2.00 | 1.10E-03 | 4.22E-02 | 21 |
| ENSOARG00000012968 | GSTP1        | 2.00 | 9.58E-09 | 9.94E-06 | 21 |
| ENSOARG00000012359 | MBD3         | 2.00 | 2.87E-05 | 3.54E-03 | 5  |
| ENSOARG00000013556 | APRT         | 2.01 | 5.35E-07 | 2.22E-04 | 14 |
| ENSOARG00000004434 | PEPD         | 2.01 | 3.11E-04 | 1.88E-02 | 14 |
| ENSOARG00000012648 | FES          | 2.03 | 2.00E-05 | 2.76E-03 | 18 |
| ENSOARG00000011864 | PFKL         | 2.03 | 2.27E-04 | 2.31E-03 | 1  |

|                    |              |      |          |          |    |
|--------------------|--------------|------|----------|----------|----|
| ENSOARG00000019139 | RABGGTA      | 2.06 | 7.39E-04 | 3.35E-02 | 7  |
| ENSOARG00000004979 | -            | 2.07 | 4.88E-04 | 2.57E-02 | 21 |
| ENSOARG00000016762 | -            | 2.08 | 8.88E-04 | 3.67E-02 | 24 |
| ENSOARG00000009928 | TIMM10       | 2.08 | 1.35E-05 | 2.05E-03 | 15 |
| ENSOARG00000014578 | -            | 2.10 | 1.19E-03 | 4.48E-02 | 14 |
| ENSOARG00000011230 | THAP3        | 2.14 | 1.93E-06 | 5.89E-04 | 12 |
| ENSOARG00000009143 | -            | 2.14 | 1.02E-04 | 8.87E-03 | 18 |
| ENSOARG00000001571 | NADSYN1      | 2.14 | 7.64E-04 | 3.43E-02 | 21 |
| ENSOARG00000008994 | -            | 2.16 | 1.04E-03 | 4.10E-02 | 18 |
| ENSOARG00000000801 | DMAP1        | 2.18 | 6.40E-04 | 3.06E-02 | 1  |
| ENSOARG00000013748 | HSPB1        | 2.19 | 2.88E-07 | 1.36E-04 | 24 |
| ENSOARG00000004520 | LOC101112678 | 2.21 | 1.97E-04 | 1.41E-02 | 18 |
| ENSOARG00000003543 | ADAM15       | 2.21 | 8.87E-05 | 8.40E-03 | 1  |
| ENSOARG00000003126 | PBXIP1       | 2.23 | 1.06E-03 | 4.10E-02 | 1  |
| ENSOARG00000005560 | SEMA4A       | 2.24 | 7.08E-10 | 1.47E-06 | 1  |
| ENSOARG00000010854 | -            | 2.26 | 3.39E-04 | 2.02E-02 | 5  |
| ENSOARG00000026481 | -            | 2.27 | 1.05E-04 | 8.89E-03 | 18 |
| ENSOARG00000000576 | GSDMD        | 2.29 | 9.63E-06 | 1.67E-03 | 9  |
| ENSOARG00000011291 | -            | 2.30 | 4.23E-10 | 1.10E-06 | X  |
| ENSOARG00000013621 | -            | 2.32 | 1.63E-04 | 1.23E-02 | 2  |
| ENSOARG00000019510 | RPS26        | 2.32 | 5.97E-08 | 3.87E-05 | 3  |
| ENSOARG00000023915 | -            | 2.32 | 8.98E-04 | 3.70E-02 | 7  |
| ENSOARG00000004300 | -            | 2.34 | 4.59E-04 | 2.47E-02 | 5  |
| ENSOARG00000008425 | LOC101102454 | 2.34 | 1.67E-10 | 5.78E-07 | 2  |
| ENSOARG00000006541 | -            | 2.34 | 1.05E-03 | 4.10E-02 | 21 |
| ENSOARG00000007476 | SIGIRR       | 2.35 | 1.03E-04 | 8.87E-03 | 21 |
| ENSOARG00000011018 | -            | 2.36 | 1.50E-06 | 4.71E-04 | 2  |
| ENSOARG00000007634 | LOC101105937 | 2.37 | 4.74E-05 | 5.07E-03 | 13 |
| ENSOARG00000019140 | TSPO         | 2.38 | 2.22E-05 | 2.99E-03 | 3  |
| ENSOARG00000005359 | CARHSP1      | 2.45 | 1.25E-04 | 1.03E-02 | 24 |
| ENSOARG00000008164 | GRN          | 2.46 | 1.05E-05 | 1.73E-03 | 11 |
| ENSOARG00000001516 | SERINC2      | 2.47 | 2.54E-04 | 1.65E-02 | 2  |
| ENSOARG00000002897 | DHX30        | 2.48 | 8.95E-05 | 8.40E-03 | 19 |

|                    |              |      |          |          |    |
|--------------------|--------------|------|----------|----------|----|
| ENSOARG00000003287 | DGKZ         | 2.54 | 9.83E-05 | 8.80E-03 | 15 |
| ENSOARG00000017916 | ANAPC11      | 2.57 | 2.00E-04 | 1.42E-02 | 11 |
| ENSOARG00000013325 | LOC101103616 | 2.63 | 1.05E-03 | 4.10E-02 | 24 |
| ENSOARG00000010831 | -            | 2.68 | 4.76E-09 | 7.06E-06 | 24 |
| ENSOARG00000008507 | ALPL         | 2.73 | 7.58E-04 | 3.42E-02 | 2  |
| ENSOARG00000011715 | -            | 2.77 | 1.33E-05 | 2.05E-03 | 5  |
| ENSOARG00000007908 | MMP9         | 2.80 | 4.44E-04 | 2.43E-02 | 13 |
| ENSOARG00000006669 | G6PC3        | 2.84 | 2.32E-05 | 3.06E-03 | 11 |
| ENSOARG00000006585 | ACSS1        | 2.86 | 1.47E-07 | 8.48E-05 | 13 |
| ENSOARG00000009600 | GALK1        | 2.89 | 2.51E-04 | 1.65E-02 | 11 |
| ENSOARG00000011983 | PTPRCAP      | 2.91 | 2.57E-13 | 1.33E-09 | 21 |
| ENSOARG00000014952 | SHARPIN      | 2.93 | 7.22E-04 | 3.32E-02 | 9  |
| ENSOARG00000001091 | U2AF2        | 3.02 | 5.03E-04 | 2.60E-02 | 14 |
| ENSOARG00000008862 | -            | 3.03 | 3.54E-15 | 3.68E-11 | 18 |
| ENSOARG00000020561 | LOC101104728 | 3.19 | 5.56E-04 | 2.78E-02 | 3  |
| ENSOARG00000009202 | -            | 3.23 | 1.06E-03 | 4.11E-02 | 1  |
| ENSOARG00000006281 | ATG16L2      | 3.25 | 1.82E-04 | 1.35E-02 | 15 |
| ENSOARG00000018894 | IL21R        | 3.57 | 1.42E-05 | 2.07E-03 | 24 |
| ENSOARG00000016461 | SPSB3        | 5.76 | 9.98E-05 | 8.80E-03 | 24 |
| ENSOARG00000011783 | MESP2        | 5.95 | 4.22E-05 | 4.66E-03 | 18 |
| ENSOARG00000011050 | -            | 6.40 | 2.12E-06 | 5.94E-04 | 18 |

**Supplementary table 2.** Significantly enriched biological processes obtained using the up-regulated genes from the HSG.

| <b>#term ID</b> | <b>term description</b>                               | <b>observed gene count</b> | <b>background gene count</b> | <b>false discovery rate</b> | <b>matching proteins in your network (labels)</b>                                      |
|-----------------|-------------------------------------------------------|----------------------------|------------------------------|-----------------------------|----------------------------------------------------------------------------------------|
| GO:0006091      | generation of precursor metabolites and energy        | 6                          | 21                           | 3.03e-05                    | COX1,COX2,CYTB,GAPDH,ND4,ND5                                                           |
| GO:0006807      | nitrogen compound metabolic process                   | 10                         | 107                          | 3.03e-05                    | ATP6,COX1,CYTB,EF-1,ENSOARG00000004520,ENSOARG00000019510,GAPDH,ND4,ND5,ZGPAT          |
| GO:0008152      | metabolic process                                     | 12                         | 158                          | 3.03e-05                    | ATP6,COX1,COX2,CYTB,EF-1,ENSOARG00000004520,ENSOARG00000019510,GAPDH,ND4,ND5,ND6,ZGPAT |
| GO:0009167      | purine ribonucleoside monophosphate metabolic process | 6                          | 14                           | 3.03e-05                    | ATP6,COX1,CYTB,GAPDH,ND4,ND5                                                           |
| GO:0022900      | electron transport chain                              | 5                          | 13                           | 3.03e-05                    | COX1,COX2,CYTB,ND4,ND5                                                                 |
| GO:0034641      | cellular nitrogen compound metabolic process          | 9                          | 67                           | 3.03e-05                    | ATP6,COX1,CYTB,EF-1,ENSOARG00000019510,GAPDH,ND4,ND5,ZGPAT                             |
| GO:0046034      | ATP metabolic process                                 | 6                          | 14                           | 3.03e-05                    | ATP6,COX1,CYTB,GAPDH,ND4,ND5                                                           |
| GO:1901564      | organonitrogen compound metabolic process             | 9                          | 75                           | 3.03e-05                    | ATP6,COX1,CYTB,EF-1,ENSOARG00000004520,ENSOARG00000019510,GAPDH,ND4,ND5                |



|            |                                                  |    |     |          |                                                                               |
|------------|--------------------------------------------------|----|-----|----------|-------------------------------------------------------------------------------|
| GO:0055114 | oxidation-reduction process                      | 7  | 45  | 3.39e-05 | COX1,COX2,CYTB,GAPDH,ND4,ND5,ND6                                              |
| GO:0006119 | oxidative phosphorylation                        | 4  | 6   | 4.23e-05 | COX1,CYTB,ND4,ND5                                                             |
| GO:0044237 | cellular metabolic process                       | 10 | 122 | 5.59e-05 | ATP6,COX1,COX2,CYTB,EF-1,ENSOARG00000019510,GAPDH,ND4,ND5,ZGPAT               |
| GO:0044238 | primary metabolic process                        | 10 | 126 | 7.04e-05 | ATP6,COX1,CYTB,EF-1,ENSOARG00000004520,ENSOARG00000019510,GAPDH,ND4,ND5,ZGPAT |
| GO:0045333 | cellular respiration                             | 4  | 8   | 8.83e-05 | COX1,CYTB,ND4,ND5                                                             |
| GO:0006139 | nucleobase-containing compound metabolic process | 7  | 56  | 0.00010  | ATP6,COX1,CYTB,GAPDH,ND4,ND5,ZGPAT                                            |
| GO:0071704 | organic substance metabolic process              | 10 | 133 | 0.00010  | ATP6,COX1,CYTB,EF-1,ENSOARG00000004520,ENSOARG00000019510,GAPDH,ND4,ND5,ZGPAT |
| GO:0016310 | phosphorylation                                  | 5  | 24  | 0.00018  | COX1,CYTB,GAPDH,ND4,ND5                                                       |
| GO:0042773 | ATP synthesis coupled electron transport         | 3  | 5   | 0.00062  | CYTB,ND4,ND5                                                                  |
| GO:0044271 | cellular nitrogen compound biosynthetic process  | 5  | 50  | 0.0035   | ATP6,EF-1,ENSOARG00000019510,GAPDH,                                           |

|            |                                                        |   |    |        |                                    |
|------------|--------------------------------------------------------|---|----|--------|------------------------------------|
| GO:1902600 | proton transmembrane transport                         | 3 | 11 | 0.0035 | ATP6,COX1,COX2                     |
| GO:1901566 | organonitrogen compound biosynthetic process           | 4 | 28 | 0.0036 | ATP6,EF-1,ENSOARG00000019510,GAPDH |
| GO:0042775 | mitochondrial ATP synthesis coupled electron transport | 2 | 3  | 0.0079 | CYTb,ND4                           |

**Supplementary table 3.** significant enriched molecular function obtained using the up-regulated genes from HSG group.

| <b>#term ID</b> | <b>term description</b>                   | <b>observed gene</b> | <b>background gene count</b> | <b>false discovery rate</b> | <b>matching proteins in your network (labels)</b>        |
|-----------------|-------------------------------------------|----------------------|------------------------------|-----------------------------|----------------------------------------------------------|
| GO:0016491      | oxidoreductase activity                   | 7                    | 40                           | 0.00012                     | COX1,COX2,CYTB,GAPDH,ND4,ND5,ND6                         |
| GO:0003824      | catalytic activity                        | 9                    | 105                          | 0.00045                     | ATP6,COX1,COX2,CYTB,ENSOARG00000004520,GAPDH,ND4,ND5,ND6 |
| GO:0008137      | NADH dehydrogenase (ubiquinone) activity  | 3                    | 7                            | 0.0048                      | ND4,ND5,ND6                                              |
| GO:0009055      | electron transfer activity                | 3                    | 8                            | 0.0048                      | COX1,COX2,CYTB                                           |
| GO:0015078      | proton transmembrane transporter activity | 3                    | 10                           | 0.0048                      | ATP6,COX1,COX2                                           |

**Supplementary table 4.** List of all modules associated with lactose. The module name with number of genes, correlation value and p-value are reported in relation with the lactose trait.

| <b>Module_name</b> | <b>Number of genes</b> | <b>Correlation_value</b> | <b>p-value</b> |
|--------------------|------------------------|--------------------------|----------------|
| MEblack            | 614                    | 0.05779468               | 0.372195198    |
| MEblue             | 2467                   | 0.47512863               | 0.0346639879   |
| MEbrown            | 2049                   | 0.4325791                | 0.381041686    |
| MEbrown4           | 34                     | 0.06081007               | 0.435999987    |
| MEcyan             | 389                    | -0.38869439              | 0.53115172     |
| MEdarkgreen        | 131                    | -0.32633967              | 0.008812693    |
| MEdarkgrey         | 104                    | -0.20514673              | 0.946787661    |
| MEdarkmagenta      | 65                     | 0.06138097               | 0.603068598    |
| MEdarkolivegreen   | 70                     | 0.46840569               | 0.777020088    |
| MEdarkorange       | 96                     | 0.19026107               | 0.055938911    |
| MEdarkorange2      | 37                     | -0.43538628              | 0.343095979    |
| MEdarkred          | 134                    | -0.22697536              | 0.474780165    |
| MEdarkturquoise    | 126                    | 0.17565644               | 0.33856232     |
| MEfloralwhite      | 43                     | -0.20009291              | 0.421503152    |
| MEgreen            | 1042                   | -0.57253985              | 0.911391936    |
| MEgreenyellow      | 424                    | 0.56293533               | 0.113089613    |
| MEgrey             | 9951                   | 0.43327898               | 0.531020836    |
| MEgrey60           | 204                    | 0.2450209                | 0.94895646     |
| MEivory            | 45                     | -0.27512806              | 0.704903591    |
| MElightcyan        | 226                    | -0.82406466              | 0.602132664    |
| MElightcyan1       | 48                     | -0.03406998              | 0.902088755    |
| MElightgreen       | 177                    | 0.64292232               | 0.0310130226   |
| MElightsteelblue1  | 48                     | -0.13220617              | 0.651476866    |
| MElightyellow      | 147                    | 0.32512839               | 0.002904869    |
| MEmagenta          | 486                    | -0.3346861               | 0.275681334    |
| MEmediumpurple3    | 53                     | -0.18193795              | 0.419170684    |
| EMidnightblue      | 346                    | -0.06129696              | 0.257770825    |
| MEorange           | 100                    | 0.1830075                | 0.868841879    |
| MEorangered4       | 51                     | 0.08489356               | 0.769739584    |

|                 |      |             |             |
|-----------------|------|-------------|-------------|
| MEpaleturquoise | 74   | 0.15369878  | 0.261181532 |
| MEpink          | 488  | 0.20317819  | 0.632934016 |
| MEplum1         | 52   | 0.10324017  | 0.220691453 |
| MEpurple        | 425  | -0.55989029 | 0.900534865 |
| MERed           | 707  | -0.15124481 | 0.639044449 |
| MEroyalblue     | 145  | 0.42241428  | 0.082944416 |
| MEsaddlebrown   | 80   | -0.27004566 | 0.146303408 |
| MEsalmon        | 410  | -0.05347002 | 0.040217918 |
| MEsienna3       | 63   | 0.27300849  | 0.485703373 |
| MEskyblue       | 89   | -0.10676245 | 0.96624799  |
| MEskyblue3      | 59   | -0.25855254 | 0.331906992 |
| MEsteelblue     | 77   | -0.10336313 | 0.036319551 |
| MEtan           | 418  | 0.12578527  | 0.030940193 |
| MEturquoise     | 3811 | 0.07309515  | 0.174808667 |
| MEviolet        | 73   | -0.08857551 | 0.56345995  |
| MEwhite         | 94   | -0.18046995 | 0.983742855 |
| MEyellow        | 1377 | 0.27661037  | 0.122735611 |
| MEyellowgreen   | 61   | 0.49253135  | 0.988108202 |

**Supplementary table 5.** List of all genes included in the lightgreen module. Gene Ids, gene symbols, gene correlation value to the lactose, correlation significance, module membership value and significance are reported.

| <b>GENE ID</b> | <b>Gene Symbol</b> | <b>GS.lactose</b> | <b>p.GS.lactose</b> | <b>MM.lightgreen</b> | <b>p.MM.lightgreen</b> |
|----------------|--------------------|-------------------|---------------------|----------------------|------------------------|
| 101104790      | LOC101104790       | 0.647147997       | 0.043111693         | 0.961327562          | 9.34E-06               |
| 101116308      | TIMM29             | 0.543048101       | 0.104767381         | 0.952453152          | 2.11E-05               |
| 101119137      | MRPS18C            | 0.63713571        | 0.047556772         | 0.946696538          | 3.31E-05               |
| 101107089      | ZNF786             | 0.553043155       | 0.097279148         | 0.945786056          | 3.54E-05               |
| 101115173      | RPS15A             | 0.629395992       | 0.05119522          | 0.940489963          | 5.10E-05               |
| 101118432      | RHNO1              | 0.489440998       | 0.151063914         | 0.931464728          | 8.88E-05               |
| 106991510      | -                  | 0.600179776       | 0.066584961         | 0.929610212          | 9.86E-05               |
| 101123618      | CSRP2              | 0.60222723        | 0.065418805         | 0.926852073          | 0.00011459             |
| 105616076      | LOC105616076       | 0.469504595       | 0.17098243          | 0.925546735          | 0.000122793            |
| 101120908      | SEMA4F             | 0.521446897       | 0.122165496         | 0.924739376          | 0.000128079            |
| 101116510      | NDUFC1             | 0.490022958       | 0.150504722         | 0.922050262          | 0.0001469              |
| 101117690      | LOC101117690       | 0.44005445        | 0.203130035         | 0.920232627          | 0.000160727            |
| 105615810      | -                  | 0.578836177       | 0.079556864         | 0.920084566          | 0.000161894            |
| 101107905      | C19H3orf67         | 0.578836177       | 0.079556864         | 0.920084566          | 0.000161894            |
| 105612398      | LOC105612398       | 0.578836177       | 0.079556864         | 0.920084566          | 0.000161894            |
| 101115477      | HYDIN              | 0.578836177       | 0.079556864         | 0.920084566          | 0.000161894            |
| 101109300      | LOC101109300       | 0.578836177       | 0.079556864         | 0.920084566          | 0.000161894            |
| 101105201      | FFAR4              | 0.578836177       | 0.079556864         | 0.920084566          | 0.000161894            |
| 101108617      | HGD                | 0.578836177       | 0.079556864         | 0.920084566          | 0.000161894            |
| 101113473      | FCN3               | 0.578836177       | 0.079556864         | 0.920084566          | 0.000161894            |
| 101111709      | STEAP1             | 0.578836177       | 0.079556864         | 0.920084566          | 0.000161894            |
| 105611299      | LOC105611299       | 0.578836177       | 0.079556864         | 0.920084566          | 0.000161894            |
| 105602059      | -                  | 0.578836177       | 0.079556864         | 0.920084566          | 0.000161894            |
| 105606371      | DPEP2NB            | 0.578836177       | 0.079556864         | 0.920084566          | 0.000161894            |
| 106991765      | LOC106991765       | 0.578836177       | 0.079556864         | 0.920084566          | 0.000161894            |
| 101115527      | LOC101115527       | 0.578836177       | 0.079556864         | 0.920084566          | 0.000161894            |
| 106990385      | LOC106990385       | 0.578836177       | 0.079556864         | 0.920084566          | 0.000161894            |
| 101116655      | GPR137C            | 0.605642896       | 0.06350329          | 0.914773271          | 0.000208045            |
| 101109153      | TESK1              | 0.715995901       | 0.019863795         | 0.911743493          | 0.000238348            |
| 101105144      | SNRPG              | 0.595785924       | 0.069133244         | 0.911559026          | 0.000240292            |

|           |              |             |             |             |             |
|-----------|--------------|-------------|-------------|-------------|-------------|
| 101116886 | LOC101116886 | 0.657202712 | 0.03893719  | 0.911463683 | 0.000241301 |
| 100307042 | FEN1         | 0.641903796 | 0.045403525 | 0.910124408 | 0.000255811 |
| 101102229 | LSM8         | 0.591141015 | 0.07189544  | 0.908504286 | 0.000274209 |
| 101115546 | RWDD2A       | 0.505385902 | 0.136196368 | 0.903674758 | 0.000334837 |
| 678684    | NARS1        | 0.722295081 | 0.018312682 | 0.901836054 | 0.000360319 |
| 101110479 | ERLIN2       | 0.345858104 | 0.327623849 | 0.899523709 | 0.000394351 |
| 100037674 | TYMS         | 0.680817266 | 0.030223647 | 0.899346783 | 0.000397048 |
| 101118201 | MRPL10       | 0.653850179 | 0.040297386 | 0.897898735 | 0.000419637 |
| 101112137 | WDR18        | 0.576644053 | 0.080974811 | 0.895128395 | 0.000465458 |
| 101109824 | THAP11       | 0.676007697 | 0.031878118 | 0.89511197  | 0.00046574  |
| 101118221 | SRSF9        | 0.532535252 | 0.113025571 | 0.894903891 | 0.000469325 |
| 105610222 | LOC105610222 | 0.734653006 | 0.015517303 | 0.892596686 | 0.000510443 |
| 101109279 | ANGEL1       | 0.439737099 | 0.203494191 | 0.890537512 | 0.000549313 |
| 101103759 | KDM2B        | 0.383517918 | 0.273943058 | 0.887761501 | 0.000605088 |
| 101117774 | NCOR1        | 0.449037112 | 0.192979435 | 0.886954579 | 0.000622049 |
| 443301    | YWHAH        | 0.450813683 | 0.191007773 | 0.885882729 | 0.000645112 |
| 101109145 | TYSND1       | 0.628691013 | 0.051535543 | 0.881964874 | 0.000734756 |
| 101119635 | ANKRD54      | 0.665228648 | 0.03580738  | 0.881056226 | 0.00075678  |
| 101105702 | B4GAT1       | 0.484191095 | 0.156165335 | 0.879699206 | 0.000790565 |
| 101104663 | SLBP         | 0.486281486 | 0.154121781 | 0.879641339 | 0.000792029 |
| 101123533 | LOC101123533 | 0.655063463 | 0.039801497 | 0.87757706  | 0.000845585 |
| 101115056 | LOC101115056 | 0.54855869  | 0.100595386 | 0.876663684 | 0.000870105 |
| 105606241 | -            | 0.453596536 | 0.187943157 | 0.874995538 | 0.000916219 |
| 106990119 | PIGZ         | 0.453596536 | 0.187943157 | 0.874995538 | 0.000916219 |
| 105604743 | LOC105604743 | 0.453596536 | 0.187943157 | 0.874995538 | 0.000916219 |
| 101116544 | NCMAP        | 0.52471053  | 0.119429236 | 0.873167604 | 0.000968768 |
| 105606686 | LOC105606686 | 0.566555448 | 0.087710308 | 0.870590051 | 0.001046551 |
| 101119924 | TCFL5        | 0.775313018 | 0.008416391 | 0.870328173 | 0.0010547   |
| 101117939 | ENY2         | 0.65604912  | 0.03940168  | 0.869698199 | 0.001074493 |
| 101116505 | CCDC34       | 0.434294518 | 0.209798333 | 0.86742894  | 0.001148034 |
| 101110182 | LCMT2        | 0.511539062 | 0.130709531 | 0.865400321 | 0.001216815 |
| 101113437 | NDUFB1       | 0.380780974 | 0.277671514 | 0.864104699 | 0.001262281 |
| 101111410 | ATP5MD       | 0.530017905 | 0.115061688 | 0.863230874 | 0.001293634 |



|           |              |             |             |             |             |
|-----------|--------------|-------------|-------------|-------------|-------------|
| 101121403 | LOC101121403 | 0.443014557 | 0.199751569 | 0.860004687 | 0.001414303 |
| 101103639 | LOC101103639 | 0.613683488 | 0.059140394 | 0.858534458 | 0.001471918 |
| 101104903 | GALNTL5      | 0.436390512 | 0.207357377 | 0.858054432 | 0.001491092 |
| 101109616 | COQ2         | 0.334327777 | 0.345067402 | 0.857809882 | 0.001500929 |
| 101107429 | WBP11        | 0.237269224 | 0.509219293 | 0.85770601  | 0.001505122 |
| 100499499 | WSB2         | 0.50282284  | 0.138522917 | 0.857000487 | 0.001533825 |
| 100270716 | SLIRP        | 0.583282439 | 0.076730367 | 0.85529442  | 0.001604872 |
| 101103082 | LOC101103082 | 0.723020614 | 0.018139601 | 0.85436804  | 0.001644434 |
| 101122056 | LOC101122056 | 0.309592112 | 0.384030436 | 0.849950714 | 0.00184286  |
| 101106788 | ZC3H18       | 0.610762271 | 0.060701871 | 0.849797026 | 0.001850061 |
| 101111239 | LAMTOR5      | 0.712123882 | 0.020861034 | 0.84805534  | 0.001933095 |
| 105607690 | LOC105607690 | 0.390805204 | 0.264149714 | 0.845342292 | 0.00206776  |
| 100037664 | LOC100037664 | 0.448475917 | 0.193604721 | 0.845246089 | 0.002072656 |
| 101123176 | RAB11FIP3    | 0.429067589 | 0.215957324 | 0.842135957 | 0.002235502 |
| 101104080 | IDH3B        | 0.774208048 | 0.008570793 | 0.840410098 | 0.002329749 |
| 101108712 | UNKL         | 0.671671839 | 0.033421475 | 0.835905067 | 0.002589247 |
| 101122275 | TIGD6        | 0.499725571 | 0.141366677 | 0.835171871 | 0.002633369 |
| 105604928 | LOC105604928 | 0.612802513 | 0.05960848  | 0.833877691 | 0.002712567 |
| 101114533 | -            | 0.638575683 | 0.046899455 | 0.831681914 | 0.002850843 |
| 101108082 | ZSCAN2       | 0.568023131 | 0.086708877 | 0.829300132 | 0.003006492 |
| 101120180 | LOC101120180 | 0.715465598 | 0.019998384 | 0.827213196 | 0.003147818 |
| 105604655 | LOC105604655 | 0.389235049 | 0.266243346 | 0.827099909 | 0.003155623 |
| 100144758 | CCNA2        | 0.44058628  | 0.202520615 | 0.826068574 | 0.003227326 |
| 105612497 | LOC105612497 | 0.881068056 | 0.00075649  | 0.823176305 | 0.00343465  |
| 101109225 | PGM1         | 0.417458297 | 0.230002931 | 0.813962158 | 0.00415896  |
| 101119090 | LOC101119090 | 0.57181715  | 0.084154236 | 0.813084049 | 0.004233252 |
| 101108844 | MYH10        | 0.545602454 | 0.10282018  | 0.810051317 | 0.004497147 |
| 101109243 | LOC101109243 | 0.758474923 | 0.01099203  | 0.809090575 | 0.004583144 |
| 101121755 | C2H2orf72    | 0.48144763  | 0.15887203  | 0.808977005 | 0.004593387 |
| 105612514 | -            | 0.434039293 | 0.210096689 | 0.808323349 | 0.004652659 |
| 101121360 | LOC101121360 | 0.5393743   | 0.107608503 | 0.804437884 | 0.005016319 |
| 101111112 | NUCKS1       | 0.289992067 | 0.416351089 | 0.802889041 | 0.005166782 |
| 105612165 | -            | 0.382089912 | 0.275884969 | 0.800247602 | 0.005430771 |

|           |              |             |             |             |             |
|-----------|--------------|-------------|-------------|-------------|-------------|
| 105611576 | LOC105611576 | 0.655184393 | 0.039752297 | 0.798664158 | 0.005593554 |
| 101119859 | PRMT6        | 0.161510384 | 0.655768833 | 0.796588915 | 0.005812121 |
| 101110003 | SUMF1        | 0.378039033 | 0.28143422  | 0.793550716 | 0.006142979 |
| 443093    | GOT2         | 0.472806102 | 0.167581322 | 0.786278542 | 0.006989003 |
| 101110984 | TAF5         | 0.301091995 | 0.39789333  | 0.77767541  | 0.008092898 |
| 105613179 | LOC105613179 | 0.242223316 | 0.5001456   | 0.776960267 | 0.00818988  |
| 101119038 | SEM1         | 0.709682938 | 0.021507157 | 0.775004436 | 0.008459311 |
| 101113939 | BCKDHB       | 0.672931723 | 0.032967904 | 0.774559678 | 0.008521443 |
| 106990861 | -            | 0.484389153 | 0.155971018 | 0.771812561 | 0.008912381 |
| 105610712 | LOC105610712 | 0.524661704 | 0.119469888 | 0.771134253 | 0.009010825 |
| 106990880 | -            | 0.644079903 | 0.044442863 | 0.76881376  | 0.009353408 |
| 101114633 | ELMO2        | 0.539574621 | 0.10745235  | 0.768783179 | 0.009357984 |
| 443297    | LOC443297    | 0.345139367 | 0.328697589 | 0.768316438 | 0.009428008 |
| 106991442 | LOC106991442 | 0.119576304 | 0.74213496  | 0.767712537 | 0.009519157 |
| 101107013 | LOC101107013 | 0.506433348 | 0.135252533 | 0.765291005 | 0.009890897 |
| 101105990 | SF3B6        | 0.258637494 | 0.470581899 | 0.761772371 | 0.010449117 |
| 101106662 | LOC101106662 | 0.320415347 | 0.366726584 | 0.754123466 | 0.011738427 |
| 101117404 | BUB1         | 0.709865895 | 0.021458256 | 0.75110253  | 0.012277054 |
| 106991640 | LOC106991640 | 0.821384725 | 0.00356777  | 0.744193963 | 0.013573531 |
| 101108353 | NDUFB4       | 0.611856464 | 0.060113852 | 0.740583054 | 0.014287876 |
| 101123048 | ENPP1        | 0.265102843 | 0.45915367  | 0.736051705 | 0.015220928 |
| 101111976 | SCRIB        | 0.713260195 | 0.020564873 | 0.726993735 | 0.017211855 |
| 101110721 | ADGRG7       | 0.364833428 | 0.299938549 | 0.721850656 | 0.018419267 |
| 101113315 | TPRKB        | 0.230008936 | 0.522639576 | 0.721264486 | 0.018560502 |
| 101123463 | NDUFA5       | 0.11161551  | 0.75886014  | 0.714268257 | 0.020304581 |
| 105602906 | -            | 0.419797516 | 0.227132238 | 0.709792669 | 0.021477819 |
| 101114362 | PIGH         | 0.328542537 | 0.353993427 | 0.709776564 | 0.021482123 |
| 101121251 | LOC101121251 | 0.747472143 | 0.01294698  | 0.698393899 | 0.024675481 |
| 101105752 | CENPE        | 0.438806055 | 0.204564735 | 0.695303655 | 0.025595621 |
| 101109979 | GEM          | 0.639444487 | 0.046505814 | 0.690535834 | 0.027060985 |
| 101115508 | LOC101115508 | 0.369014122 | 0.294012073 | 0.690305988 | 0.027133044 |
| 101109126 | C19H3orf20   | 0.219790133 | 0.541769538 | 0.68332797  | 0.029383675 |
| 101104998 | RASL11B      | 0.467026425 | 0.17356218  | 0.679053986 | 0.030823246 |

|           |              |              |             |              |             |
|-----------|--------------|--------------|-------------|--------------|-------------|
| 105610271 | -            | 0.555773132  | 0.095294813 | 0.677580815  | 0.031330362 |
| 101102475 | TSPAN12      | 0.555773132  | 0.095294813 | 0.677580815  | 0.031330362 |
| 101104641 | HOXD13       | 0.555773132  | 0.095294813 | 0.677580815  | 0.031330362 |
| 101105689 | -            | 0.384875565  | 0.272103751 | 0.675370988  | 0.032101657 |
| 106990454 | LOC106990454 | 0.538233266  | 0.108500686 | 0.671174458  | 0.033601697 |
| 101106995 | LSS          | 0.384092511  | 0.273163789 | 0.668275718  | 0.034665161 |
| 106991532 | -            | 0.515189404  | 0.127520014 | 0.651183361  | 0.041401931 |
| 101114007 | NDUFA6       | 0.819242158  | 0.003731783 | 0.648401664  | 0.042575544 |
| 105606223 | ATP5F1E      | 0.218393993  | 0.544404569 | 0.643828378  | 0.044553199 |
| 100302554 | SLC39A6      | 0.03721404   | 0.918706931 | 0.634629802  | 0.048715271 |
| 101120255 | PIGS         | 0.534542161  | 0.111418603 | 0.633018301  | 0.049470128 |
| 101114418 | ESCO2        | 0.355176945  | 0.313867339 | 0.615130496  | 0.058376828 |
| 105603374 | LOC105603374 | 0.714022167  | 0.020367913 | 0.608366961  | 0.062002292 |
| 101112287 | LOC101112287 | 0.614817747  | 0.058541308 | 0.592058733  | 0.071344104 |
| 101121287 | GAN          | 0.134628063  | 0.710781024 | 0.579058433  | 0.079414003 |
| 101121549 | ANKRD13A     | 0.222479259  | 0.536708537 | 0.506034879  | 0.135611111 |
| 101105823 | LOC101105823 | 0.264638258  | 0.459970711 | 0.449635088  | 0.19231447  |
| 101108653 | -            | -0.358103504 | 0.309610761 | -0.354376374 | 0.315037058 |
| 101123347 | HOOK3        | -0.498390278 | 0.1426036   | -0.420492523 | 0.226283266 |
| 101117110 | KIAA1671     | -0.347623561 | 0.324994102 | -0.52248557  | 0.121290477 |
| 100216462 | FN1          | -0.186152035 | 0.606612252 | -0.551460794 | 0.098441243 |
| 101117907 | CACNB4       | -0.887354269 | 0.000613605 | -0.579941154 | 0.078848248 |
| 101116239 | LIG4         | -0.75177354  | 0.012155948 | -0.610410682 | 0.060891615 |
| 101111560 | LOC101111560 | -0.16960484  | 0.639478891 | -0.627883565 | 0.051927175 |
| 105609364 | LOC105609364 | -0.617500298 | 0.057140417 | -0.634982632 | 0.048551029 |
| 106991526 | LOC106991526 | -0.476460028 | 0.163864701 | -0.635505404 | 0.04830836  |
| 101116782 | WNT2B        | -0.519388325 | 0.123911289 | -0.638466622 | 0.046949026 |
| 101104867 | DLG2         | -0.080329695 | 0.825408314 | -0.646225049 | 0.043509286 |
| 101105604 | SNUPN        | -0.796015073 | 0.005873616 | -0.664931398 | 0.035920152 |
| 101105678 | SIRPB2       | -0.26041491  | 0.46742771  | -0.6672923   | 0.035031065 |
| 101121120 | CLIP1        | -0.864078173 | 0.001263224 | -0.671746973 | 0.033394308 |
| 101109836 | TAF8         | -0.78760984  | 0.006828295 | -0.695009765 | 0.025684335 |
| 101117981 | KCNJ15       | -0.678595806 | 0.030980364 | -0.700138693 | 0.024166121 |

|           |              |              |             |              |             |
|-----------|--------------|--------------|-------------|--------------|-------------|
| 106991416 | -            | -0.227996798 | 0.526384323 | -0.700424793 | 0.024083295 |
| 101120670 | MAX          | -0.50014657  | 0.140978058 | -0.706895249 | 0.022261797 |
| 101111434 | LOC101111434 | -0.510752433 | 0.131403237 | -0.755682671 | 0.011467017 |
| 105604793 | PILRB        | -0.479488561 | 0.160822017 | -0.759567941 | 0.010809924 |
| 101104522 | LOC101104522 | -0.585430152 | 0.075388692 | -0.764418702 | 0.010027277 |
| 101118600 | LOC101118600 | -0.31343303  | 0.377844755 | -0.774243132 | 0.00856586  |
| 105603230 | LOC105603230 | -0.591051554 | 0.071949333 | -0.780437331 | 0.007725967 |
| 101122115 | KIAA0408     | -0.616978123 | 0.057411355 | -0.803779781 | 0.005079863 |
| 101105233 | FGD4         | -0.886924433 | 0.000622689 | -0.80559691  | 0.00490579  |
| 101102594 | GMPR         | -0.49669817  | 0.144180517 | -0.831187561 | 0.002882661 |
| 101120236 | LOC101120236 | -0.590989215 | 0.071986904 | -0.831267276 | 0.002877513 |
| 101116103 | WLS          | -0.396992102 | 0.255988608 | -0.846420631 | 0.00201345  |
| 101110450 | NAIP         | -0.577426855 | 0.080466609 | -0.847847454 | 0.001943182 |
| 101102278 | -            | -0.708747112 | 0.021758491 | -0.853739208 | 0.001671688 |
| 101120892 | HMGB2        | -0.657742429 | 0.038721147 | -0.871454765 | 0.001019968 |

**Supplementary table 6.** List of all genes included in the blue module. Gene Ids, gene symbols, gene correlation value to the lactose, correlation significance, module membership value and significance are reported.

| <b>GENE ID</b> | <b>Gene symbol</b> | <b>GS.lactose</b> | <b>p.GS.lactose</b> | <b>MM.blue</b> | <b>p.MM.blue</b> |
|----------------|--------------------|-------------------|---------------------|----------------|------------------|
| 101101898      | PHF20L1            | -0.925753171      | 0.000121468         | -0.601883304   | 0.065613751      |
| 101116364      | SENP2              | -0.906297453      | 0.000300811         | -0.531829753   | 0.113593907      |
| 101114952      | TNFAIP8            | -0.880051619      | 0.000781687         | -0.633514846   | 0.049236712      |
| 101107913      | TIGD3              | 0.851148358       | 0.001787439         | 0.675131294    | 0.032186086      |
| 101105634      | CLK1               | -0.8425392        | 0.002213884         | -0.714898423   | 0.020143027      |
| 101122040      | GIT1               | 0.489642073       | 0.150870564         | 0.998908222    | 0.0000000000621  |
| 101111864      | SH3BGR13           | 0.462260309       | 0.178588362         | 0.998836612    | 0.000000000008   |
| 101115757      | AGTPBP1            | -0.834371979      | 0.002682119         | -0.506361816   | 0.135316861      |
| 101122880      | PLLP               | 0.828511923       | 0.003059321         | 0.563876851    | 0.089557021      |
| 106991357      | -                  | 0.815039178       | 0.004069119         | 0.454584358    | 0.186862313      |
| 106992023      | -                  | 0.810929231       | 0.004419579         | 0.610513768    | 0.060835942      |
| 106991584      | LOC106991584       | 0.80068561        | 0.005386346         | 0.500518577    | 0.140635208      |
| 101109051      | PTBP2              | -0.800030491      | 0.005452889         | -0.576231536   | 0.081243451      |
| 101107003      | LOC101107003       | 0.484347222       | 0.156012145         | 0.998635073    | 0.000000000152   |
| 101102615      | ACAP2              | -0.791057335      | 0.006424342         | -0.60595925    | 0.063327763      |
| 101121537      | HERPUD1            | -0.787986305      | 0.00678333          | -0.476719201   | 0.163602977      |
| 101122014      | LOC101122014       | 0.784520495       | 0.007205316         | 0.447581825    | 0.194603366      |
| 101121145      | CXCL12             | 0.776969152       | 0.00818867          | 0.661637964    | 0.037185733      |
| 101114872      | CHAC1              | 0.774729187       | 0.008497725         | 0.639263149    | 0.046587793      |
| 101104233      | CLK4               | -0.774100065      | 0.008585989         | -0.594688556   | 0.069779461      |
| 101102536      | OSBPL6             | 0.773628686       | 0.008652545         | 0.611026073    | 0.060559759      |
| 101112423      | GGT5               | 0.484338292       | 0.156020904         | 0.998063593    | 0.0000000000614  |
| 101107640      | PTPRG              | 0.770457623       | 0.009109788         | 0.695182045    | 0.025632305      |
| 106991010      | -                  | 0.493132706       | 0.147537946         | 0.998056283    | 0.0000000000623  |
| 101120464      | KIAA0556           | -0.769729647      | 0.009217114         | -0.447129332   | 0.195109916      |
| 101106288      | LOC101106288       | 0.497254948       | 0.143660473         | 0.997947474    | 0.0000000000775  |
| 105605852      | DGCR6L             | 0.493788813       | 0.146916586         | 0.997638075    | 0.000000000136   |
| 105611599      | -                  | 0.764149093       | 0.010069695         | 0.586955571    | 0.074445067      |
| 100135455      | TPT1               | 0.475754505       | 0.164578441         | 0.997394817    | 0.000000000201   |

|           |              |              |             |              |               |
|-----------|--------------|--------------|-------------|--------------|---------------|
| 101122631 | MRPS11       | 0.506053542  | 0.135594303 | 0.997349134  | 0.00000000215 |
| 101106848 | RPLP1        | 0.521182648  | 0.122388735 | 0.997332671  | 0.00000000221 |
| 101103086 | TOP1         | -0.760389972 | 0.010674371 | -0.724169078 | 0.01786795    |
| 101120124 | GBE1         | -0.757374985 | 0.011177455 | -0.75456196  | 0.011661648   |
| 101115969 | LOC101115969 | -0.754115283 | 0.011739864 | -0.781918489 | 0.007534123   |
| 105603777 | LOC105603777 | 0.751666177  | 0.012175269 | 0.604998626  | 0.063861745   |
| 101114953 | SPATA24      | 0.748679377  | 0.012721436 | 0.68309645   | 0.029460457   |
| 101119684 | ST14         | 0.482343455  | 0.157985127 | 0.997311345  | 0.00000000228 |
| 106991032 | -            | 0.748056084  | 0.012837537 | 0.653152331  | 0.040584482   |
| 101110516 | WTAP         | -0.747816888 | 0.012882289 | -0.745049654 | 0.013407985   |
| 105608579 | LOC105608579 | 0.743276628  | 0.013752586 | 0.629717691  | 0.05104042    |
| 101119685 | PTPRCAP      | 0.472268223  | 0.168132647 | 0.99715832   | 0.00000000284 |
| 101123646 | AFMID        | 0.738598571  | 0.014691437 | 0.504316712  | 0.137163956   |
| 101106887 | ARPP21       | -0.737344204 | 0.014950585 | -0.62033134  | 0.055686191   |
| 443519    | HIF1A        | -0.735806657 | 0.015272565 | -0.606032594 | 0.063287115   |
| 101109127 | UBR2         | -0.735379466 | 0.015362874 | -0.658370668 | 0.03847069    |
| 105602038 | LOC105602038 | 0.734569403  | 0.015535144 | 0.680785858  | 0.030234257   |
| 101123096 | PLEKHA3      | -0.734196846 | 0.015614823 | -0.90273219  | 0.000347728   |
| 101106827 | HTR2B        | 0.732368009  | 0.016010088 | 0.680239589  | 0.030419202   |
| 101118832 | OSBPL5       | 0.732368009  | 0.016010088 | 0.680239589  | 0.030419202   |
| 100101234 | CHID1        | 0.495349192  | 0.14544525  | 0.997089502  | 0.00000000313 |
| 443277    | CEBPB        | 0.490971985  | 0.149595523 | 0.997088428  | 0.00000000313 |
| 101108073 | ADM5         | 0.454609218  | 0.186835159 | 0.996979292  | 0.00000000363 |
| 101102511 | PLEKHB1      | 0.725399982  | 0.017579947 | 0.642461254  | 0.04515612    |
| 101103437 | CCDC85B      | 0.501826481  | 0.139433866 | 0.996706318  | 0.00000000513 |
| 101105152 | DLD          | -0.724703359 | 0.017742542 | -0.864853922 | 0.001235841   |
| 105602975 | LOC105602975 | 0.71992277   | 0.018886604 | 0.662803803  | 0.036734343   |
| 101123565 | -            | -0.715523272 | 0.019983716 | -0.705050915 | 0.022770972   |
| 101118775 | CLEC1A       | -0.713613076 | 0.020473495 | -0.376661161 | 0.283335394   |
| 105604154 | POLR2L       | 0.497389958  | 0.143534543 | 0.996605394  | 0.00000000579 |
| 101103196 | RPLP2        | 0.479067604  | 0.161242892 | 0.996575654  | 0.00000000599 |
| 101108904 | C3H12orf57   | 0.451160777  | 0.190623949 | 0.996325972  | 0.00000000794 |
| 105616104 | LOC105616104 | 0.710222113  | 0.021363265 | 0.472368309  | 0.168029976   |

|           |              |              |             |              |               |
|-----------|--------------|--------------|-------------|--------------|---------------|
| 101122265 | NCKAP5L      | 0.709009378  | 0.021687851 | 0.580646805  | 0.078397859   |
| 101111579 | TM6SF1       | -0.708702388 | 0.021770552 | -0.625619864 | 0.05303565    |
| 101111447 | LRRK2        | -0.708196515 | 0.021907306 | -0.869204052 | 0.001090206   |
| 106991575 | -            | 0.70661166   | 0.022339573 | 0.690156477  | 0.027179987   |
| 101104014 | BAZ1A        | -0.705776334 | 0.022569756 | -0.708024418 | 0.021953963   |
| 101116783 | FADD         | 0.42386885   | 0.222184691 | 0.996095156  | 0.0000000101  |
| 101113141 | LOC101113141 | 0.460780803  | 0.180165925 | 0.995746518  | 0.0000000142  |
| 101116108 | DPM3         | 0.455443844  | 0.185924871 | 0.995573493  | 0.0000000167  |
| 101122675 | -            | 0.476400059  | 0.163925297 | 0.995472816  | 0.0000000183  |
| 105608232 | -            | -0.701254141 | 0.023844301 | -0.368468896 | 0.2947814     |
| 101114714 | NATD1        | 0.46019703   | 0.18079065  | 0.995396235  | 0.0000000195  |
| 105604767 | LOC105604767 | 0.697519285  | 0.024933561 | 0.676732527  | 0.031624932   |
| 101103448 | ATXN7L2      | 0.697519285  | 0.024933561 | 0.676732527  | 0.031624932   |
| 105604388 | LOC105604388 | 0.697160757  | 0.025039887 | 0.683210362  | 0.029422662   |
| 101119166 | FAM177A1     | -0.697020886 | 0.025081452 | -0.727234934 | 0.017156618   |
| 101117149 | MTLN         | 0.475528399  | 0.164807575 | 0.995382046  | 0.0000000198  |
| 101112463 | LOC101112463 | 0.47365942   | 0.166708894 | 0.995372206  | 0.000000002   |
| 101117497 | PTPN12       | -0.691815606 | 0.026662161 | -0.670933243 | 0.033689337   |
| 105604618 | LOC105604618 | 0.687682904  | 0.027964718 | 0.60702349   | 0.062739617   |
| 101111201 | PARP10       | 0.466472214  | 0.174142256 | 0.995319821  | 0.0000000209  |
| 101108092 | LOC101108092 | 0.684716945  | 0.028925897 | 0.539431205  | 0.107564131   |
| 101112935 | NDUFS8       | 0.458085943  | 0.183060501 | 0.995249225  | 0.0000000222  |
| 105610551 | LOC105610551 | -0.682831519 | 0.029548487 | -0.422630168 | 0.223683391   |
| 101113745 | LOC101113745 | 0.682601718  | 0.02962499  | 0.672110541  | 0.033263061   |
| 101122188 | MXD3         | 0.479955405  | 0.160356037 | 0.995206559  | 0.0000000023  |
| 101110890 | PITPNM1      | 0.520270171  | 0.123161546 | 0.995137322  | 0.00000000243 |
| 101119562 | HERC5        | -0.677874387 | 0.031228855 | -0.626398893 | 0.052652425   |
| 106991482 | LOC106991482 | -0.676237383 | 0.031797739 | -0.479528197 | 0.160782423   |
| 101113696 | LOC101113696 | 0.509161779  | 0.132812915 | 0.995045044  | 0.00000000262 |
| 101105879 | C2H9orf43    | -0.672926706 | 0.032969702 | -0.718378311 | 0.019266871   |
| 105605853 | -            | -0.672416112 | 0.033153021 | -0.356121292 | 0.312490482   |
| 101110586 | CCDC124      | 0.454765228  | 0.186664807 | 0.995044392  | 0.00000000262 |
| 100125354 | PLIN2        | 0.670424184  | 0.033874798 | 0.519361001  | 0.123934566   |



|           |              |              |             |              |               |
|-----------|--------------|--------------|-------------|--------------|---------------|
| 780466    | MIF          | 0.440461801  | 0.202663159 | 0.994637437  | 0.00000000359 |
| 101123116 | LOC101123116 | 0.443904349  | 0.198742453 | 0.994540611  | 0.00000000386 |
| 443470    | IGFBP4       | 0.458793664  | 0.182297692 | 0.994475934  | 0.00000000405 |
| 101111148 | ANTKMT       | 0.458962011  | 0.182116518 | 0.99439275   | 0.0000000043  |
| 101116953 | AMDHD2       | 0.458774638  | 0.182318174 | 0.994282268  | 0.00000000464 |
| 101114741 | FBXL15       | 0.432168839  | 0.212290698 | 0.994270273  | 0.00000000468 |
| 101113725 | CTSL         | 0.662248051  | 0.036949055 | 0.681154081  | 0.030110025   |
| 101103529 | ZNF500       | 0.49709445   | 0.143810264 | 0.994266577  | 0.0000000047  |
| 101109691 | -            | 0.49709445   | 0.143810264 | 0.994266577  | 0.0000000047  |
| 101109464 | RECQL5       | 0.49709445   | 0.143810264 | 0.994266577  | 0.0000000047  |
| 101114547 | AKTIP        | -0.656836892 | 0.039084085 | -0.6991754   | 0.024446435   |
| 101103833 | KLHL36       | 0.474644158  | 0.165705489 | 0.9941297    | 0.00000000516 |
| 101114160 | INTS1        | 0.44002382   | 0.203165166 | 0.9940695    | 0.00000000537 |
| 101121636 | PDCD1        | 0.484061924  | 0.156292146 | 0.993896343  | 0.00000000603 |
| 101119766 | TREX1        | 0.425335656  | 0.220417408 | 0.993807078  | 0.00000000639 |
| 101104198 | CAPN10       | 0.497758983  | 0.143190682 | 0.99328053   | 0.00000000885 |
| 101114106 | TPGS1        | 0.444528394  | 0.198036496 | 0.992876045  | 0.0000000112  |
| 106991813 | -            | 0.653745208  | 0.040340484 | 0.507984861  | 0.133861902   |
| 101103141 | LOC101103141 | 0.651898195  | 0.041103889 | 0.490828715  | 0.149732566   |
| 105613233 | MS4A3        | 0.651645991  | 0.041208877 | 0.631520481  | 0.050178682   |
| 101109189 | LOC101109189 | 0.651645991  | 0.041208877 | 0.631520481  | 0.050178682   |
| 101117024 | RIPOR2       | -0.650168764 | 0.041827443 | -0.697395599 | 0.024970206   |
| 101108465 | MRPL41       | 0.497388661  | 0.143535753 | 0.992825404  | 0.0000000115  |
| 101109634 | PPDPF        | 0.473566041  | 0.166804232 | 0.992738953  | 0.0000000121  |
| 101105220 | EIF4G3       | -0.649495098 | 0.042111589 | -0.755544533 | 0.011490883   |
| 101122114 | TAB2         | -0.649099346 | 0.042279117 | -0.836220723 | 0.002570416   |
| 101109097 | CMYA5        | -0.648148236 | 0.042683563 | -0.509003888 | 0.132953348   |
| 101118496 | ELOB         | 0.451935069  | 0.189769349 | 0.992709781  | 0.0000000122  |
| 780444    | BAD          | 0.484291798  | 0.156066516 | 0.992667787  | 0.0000000125  |
| 443446    | THRA         | 0.391381213  | 0.263383944 | 0.992632694  | 0.0000000128  |
| 101112572 | LOC101112572 | 0.643298709  | 0.044786147 | 0.675711418  | 0.031982005   |
| 101119561 | PLA2G12A     | -0.642183952 | 0.045279076 | -0.616119511 | 0.057858699   |
| 100147789 | SLC25A6      | 0.478961436  | 0.161349143 | 0.99262883   | 0.0000000128  |

|           |              |              |             |              |              |
|-----------|--------------|--------------|-------------|--------------|--------------|
| 101110843 | RELL1        | -0.638995515 | 0.046708959 | -0.622371463 | 0.054653558  |
| 101117061 | GTPBP6       | 0.460746512  | 0.180202587 | 0.992622318  | 0.0000000128 |
| 101121367 | TMED6        | -0.636513692 | 0.047842602 | -0.678418788 | 0.031041213  |
| 101117771 | SLC52A2      | 0.526777988  | 0.117715799 | 0.992538669  | 0.0000000134 |
| 101113198 | FBP1         | 0.635807567  | 0.048168466 | 0.647767978  | 0.042845986  |
| 101105211 | ORAI3        | 0.633840872  | 0.049083854 | 0.645226524  | 0.043942197  |
| 101120878 | -            | 0.394751272  | 0.258928157 | 0.992527465  | 0.0000000135 |
| 100192427 | LOC100192427 | 0.419869297  | 0.227044472 | 0.992431552  | 0.0000000142 |
| 101117506 | ABHD17A      | 0.46035892   | 0.180617275 | 0.992378433  | 0.0000000146 |
| 101103941 | GPR35        | 0.465982507  | 0.174655776 | 0.99228435   | 0.0000000154 |
| 101103106 | DEAF1        | 0.430488353  | 0.21427307  | 0.992169106  | 0.0000000163 |
| 106991840 | LOC106991840 | 0.448143774  | 0.193975353 | 0.992147589  | 0.0000000165 |
| 101103316 | RPS28        | 0.461470371  | 0.179429633 | 0.992057056  | 0.0000000172 |
| 101121482 | ZNHIT1       | 0.480594865  | 0.159719081 | 0.992034398  | 0.0000000174 |
| 101111663 | MTFP1        | 0.50600996   | 0.135633555 | 0.992003761  | 0.0000000177 |
| 101104227 | TMEM184B     | 0.500936881  | 0.140250299 | 0.991971544  | 0.000000018  |
| 101105716 | HSD3B7       | 0.533282133  | 0.112425844 | 0.991964575  | 0.0000000181 |
| 101104173 | LIG1         | 0.534512017  | 0.111442634 | 0.991961688  | 0.0000000181 |
| 101123464 | PDLIM7       | 0.434722727  | 0.209298309 | 0.991890767  | 0.0000000187 |
| 101116037 | DCTN1        | 0.451163084  | 0.190621399 | 0.99178896   | 0.0000000197 |
| 101112372 | LFNG         | 0.403638887  | 0.247378581 | 0.991787172  | 0.0000000197 |
| 101117023 | MRPL14       | 0.492023843  | 0.148591713 | 0.991776839  | 0.0000000198 |
| 101123626 | ZYX          | 0.43234731   | 0.212080788 | 0.991725932  | 0.0000000203 |
| 101114949 | TRABD        | 0.422686548  | 0.223615052 | 0.991725328  | 0.0000000203 |
| 101112896 | ALG12        | 0.483869305  | 0.156481361 | 0.991703496  | 0.0000000205 |
| 101110018 | BTBD19       | 0.620788067  | 0.055453901 | 0.632044082  | 0.049930226  |
| 101102439 | AP5B1        | 0.458805734  | 0.182284699 | 0.991654267  | 0.000000021  |
| 101112238 | SPNS2        | 0.414420794  | 0.233761065 | 0.991637271  | 0.0000000212 |
| 101102122 | LOC101102122 | 0.551912218  | 0.09810882  | 0.991313429  | 0.0000000247 |
| 101115257 | -            | -0.61823223  | 0.056762068 | -0.823849324 | 0.003385577  |
| 101119858 | FANCF        | 0.618195561  | 0.056780983 | 0.631686511  | 0.05009981   |
| 101101844 | LRRFIP1      | -0.61731982  | 0.057233965 | -0.660637005 | 0.037576261  |
| 106991908 | -            | 0.616507951  | 0.057656035 | 0.60299862   | 0.064982943  |

|           |              |              |             |              |              |
|-----------|--------------|--------------|-------------|--------------|--------------|
| 100302318 | GATD3A       | 0.493481963  | 0.147206987 | 0.991283706  | 0.000000025  |
| 101105367 | LOC101105367 | 0.421383105  | 0.225198034 | 0.991128201  | 0.0000000268 |
| 101120024 | CLEC3B       | 0.454586934  | 0.186859499 | 0.991028939  | 0.000000028  |
| 101104621 | FAM53B       | 0.481365997  | 0.158952998 | 0.990943085  | 0.0000000291 |
| 105601982 | LOC105601982 | 0.61255821   | 0.059738716 | 0.672492609  | 0.033125512  |
| 101120662 | ZFYVE16      | -0.611443226 | 0.060335483 | -0.833738286 | 0.002721199  |
| 101108347 | RPP21        | 0.496504645  | 0.144361542 | 0.990889098  | 0.0000000298 |
| 101104417 | RBM38        | 0.486039004  | 0.154357996 | 0.990690817  | 0.0000000325 |
| 101119657 | GALK1        | 0.452172533  | 0.189507706 | 0.990687727  | 0.0000000325 |
| 101123166 | PNPLA2       | 0.43857654   | 0.204829138 | 0.990628966  | 0.0000000334 |
| 105603818 | LOC105603818 | 0.608059433  | 0.062170564 | 0.58606851   | 0.074992865  |
| 101119259 | CISH         | 0.405506654  | 0.244988628 | 0.990551612  | 0.0000000345 |
| 101121826 | KAT6A        | -0.606930515 | 0.062790855 | -0.829277224 | 0.003008018  |
| 101115712 | CCNB2        | 0.606447772  | 0.063057337 | 0.62484874   | 0.053416803  |
| 101114695 | ARID5A       | 0.399386868  | 0.252867647 | 0.990459069  | 0.0000000358 |
| 101115720 | MCRIP1       | 0.438705436  | 0.204680625 | 0.990412758  | 0.0000000365 |
| 101103676 | INF2         | 0.495979644  | 0.144853331 | 0.990368972  | 0.0000000372 |
| 101115705 | CFD          | 0.441466256  | 0.20151459  | 0.990193055  | 0.00000004   |
| 101116066 | NAXD         | 0.474773346  | 0.165574121 | 0.990189816  | 0.00000004   |
| 101121189 | C13H20orf27  | 0.406321769  | 0.243949686 | 0.990159589  | 0.0000000405 |
| 101102967 | LOC101102967 | 0.605332542  | 0.063675797 | 0.663983055  | 0.036281541  |
| 101111462 | PLEC         | 0.500855691  | 0.140324957 | 0.990150712  | 0.0000000407 |
| 101118537 | LOC101118537 | 0.500855691  | 0.140324957 | 0.990150712  | 0.0000000407 |
| 101105453 | SAC3D1       | 0.500855691  | 0.140324957 | 0.990150712  | 0.0000000407 |
| 101110073 | MAPK7        | 0.49890327   | 0.142127621 | 0.990148772  | 0.0000000407 |
| 105616381 | LOC105616381 | 0.603310066  | 0.064807505 | 0.344322846  | 0.329919614  |
| 105603009 | -            | 0.603166122  | 0.06488855  | 0.625402965  | 0.053142677  |
| 105603532 | -            | 0.603166122  | 0.06488855  | 0.625402965  | 0.053142677  |
| 101120874 | GSTP1        | 0.397641375  | 0.255140351 | 0.990074217  | 0.000000042  |
| 101113512 | ITPKB        | 0.423864931  | 0.222189424 | 0.989937846  | 0.0000000443 |
| 105604257 | LOC105604257 | 0.600766718  | 0.066249281 | 0.650508951  | 0.041684446  |
| 101120122 | TSSC4        | 0.48785925   | 0.152590137 | 0.989876009  | 0.0000000454 |
| 101116327 | CARS2        | 0.540567668  | 0.106680358 | 0.989816234  | 0.0000000465 |

|           |              |              |             |              |              |
|-----------|--------------|--------------|-------------|--------------|--------------|
| 100270712 | FABP5        | 0.599514339  | 0.066966878 | 0.699612672  | 0.024318915  |
| 101109175 | REX1BD       | 0.433302495  | 0.210959373 | 0.989745175  | 0.0000000478 |
| 101119138 | SH3TC1       | 0.421780508  | 0.224714729 | 0.989683091  | 0.000000049  |
| 101120439 | SLC43A1      | 0.450172974  | 0.191717474 | 0.989632059  | 0.0000000499 |
| 101106717 | SIVA1        | 0.453158469  | 0.188423649 | 0.989478314  | 0.0000000529 |
| 101112013 | LOC101112013 | 0.490292308  | 0.150246336 | 0.989460193  | 0.0000000533 |
| 101115992 | SDF2L1       | 0.457332671  | 0.183874472 | 0.989416621  | 0.0000000542 |
| 101103507 | MRPL36       | 0.389393883  | 0.266031146 | 0.989302576  | 0.0000000566 |
| 101107225 | GAS2L1       | 0.478889714  | 0.161420946 | 0.989297032  | 0.0000000567 |
| 101111258 | RAP2C        | -0.592737738 | 0.070937956 | -0.84023947  | 0.00233922   |
| 101110355 | JOSD2        | 0.462672099  | 0.178150741 | 0.989179241  | 0.0000000592 |
| 101106762 | LCN6         | 0.507322041  | 0.134454911 | 0.989156787  | 0.0000000597 |
| 106991959 | LOC106991959 | 0.507322041  | 0.134454911 | 0.989156787  | 0.0000000597 |
| 101107688 | C1S          | 0.507322041  | 0.134454911 | 0.989156787  | 0.0000000597 |
| 101104132 | -            | 0.507322041  | 0.134454911 | 0.989156787  | 0.0000000597 |
| 101122385 | TRMT2A       | 0.456490314  | 0.18478723  | 0.989145964  | 0.0000000599 |
| 101112952 | LOC101112952 | 0.587635911  | 0.074026693 | 0.428672493  | 0.216427039  |
| 101109325 | BCAS2        | -0.587232181 | 0.074274781 | -0.544390533 | 0.103741158  |
| 101103150 | LOC101103150 | 0.49177474   | 0.148829066 | 0.989127436  | 0.0000000603 |
| 101113686 | HDAC5        | 0.394265787  | 0.259567467 | 0.989110125  | 0.0000000607 |
| 101109472 | DBNDD2       | 0.586033899  | 0.075014291 | 0.539803991  | 0.107273727  |
| 101120817 | -            | 0.488990733  | 0.151497426 | 0.988899657  | 0.0000000655 |
| 105612994 | LOC105612994 | 0.446742488  | 0.195543585 | 0.988895042  | 0.0000000657 |
| 101120377 | MPG          | 0.415641136  | 0.232247064 | 0.988856045  | 0.0000000666 |
| 101115250 | YPEL3        | 0.404856219  | 0.24581944  | 0.988817002  | 0.0000000675 |
| 100305129 | MRPL32       | -0.582773444 | 0.077050587 | -0.797520962 | 0.005713219  |
| 101114563 | ZXDC         | 0.42009721   | 0.226765931 | 0.988757544  | 0.000000069  |
| 443117    | JUNB         | 0.396871944  | 0.256145762 | 0.988505933  | 0.0000000753 |
| 101115745 | DUSP23       | 0.4073762    | 0.242609379 | 0.988466668  | 0.0000000763 |
| 101102104 | GATD1        | 0.462203176  | 0.178649129 | 0.988436415  | 0.0000000771 |
| 101109841 | CORO1B       | 0.428352939  | 0.216807372 | 0.988239039  | 0.0000000825 |
| 101113072 | LOC101113072 | 0.415913069  | 0.231910451 | 0.988144216  | 0.0000000852 |
| 101103806 | MARCHF2      | 0.438228066  | 0.205230962 | 0.988013221  | 0.000000089  |

|           |              |              |             |              |              |
|-----------|--------------|--------------|-------------|--------------|--------------|
| 101105213 | FAM207A      | 0.50010424   | 0.141017103 | 0.987910516  | 0.0000000921 |
| 101107260 | LOC101107260 | 0.476157025  | 0.164171006 | 0.98779404   | 0.0000000957 |
| 101113423 | NT5M         | 0.374352467  | 0.286536393 | 0.987741086  | 0.0000000974 |
| 101116329 | AMZ2         | 0.57889797   | 0.079517129 | 0.680236932  | 0.030420103  |
| 101119489 | PARK7        | 0.57862431   | 0.079693202 | 0.426159726  | 0.219428062  |
| 101112159 | CHST1        | 0.487283801  | 0.153147692 | 0.987728939  | 0.0000000977 |
| 101108492 | SGPP1        | -0.577361683 | 0.08050884  | -0.778788621 | 0.007943553  |
| 101104370 | CHMP5        | -0.577317856 | 0.080537248 | -0.750977194 | 0.012299769  |
| 105614924 | -            | 0.43804013   | 0.205447859 | 0.987541909  | 0.000000104  |
| 101107594 | COPE         | 0.463980938  | 0.176764022 | 0.987515228  | 0.000000105  |
| 101109968 | ALKBH7       | 0.392237918  | 0.262247266 | 0.987512777  | 0.000000105  |
| 101112474 | LOC101112474 | 0.454869715  | 0.186550766 | 0.987501558  | 0.000000105  |
| 101110655 | NECAP2       | 0.575219681  | 0.081904828 | 0.647560066  | 0.042934969  |
| 101110136 | EP300        | -0.57488106  | 0.082126933 | -0.74884379  | 0.012690933  |
| 101119103 | NUDT1        | 0.500286393  | 0.140849135 | 0.987442642  | 0.000000107  |
| 101115229 | NCAPD3       | 0.574011773  | 0.082698882 | 0.631180959  | 0.050340229  |
| 101117189 | EPN1         | 0.478729907  | 0.161581    | 0.98744242   | 0.000000107  |
| 101117762 | ADAT3        | 0.484549038  | 0.155814258 | 0.987221905  | 0.000000115  |
| 101108361 | LOC101108361 | 0.500590223  | 0.140569236 | 0.987163932  | 0.000000117  |
| 101110110 | SLC19A1      | 0.501251395  | 0.139961319 | 0.987132738  | 0.000000118  |
| 101112458 | TMEM18       | 0.35445834   | 0.314917192 | 0.986926541  | 0.000000126  |
| 101114511 | AGPAT2       | 0.523772928  | 0.120211381 | 0.986920021  | 0.000000126  |
| 101106791 | LOC101106791 | 0.464508493  | 0.176206892 | 0.986914004  | 0.000000126  |
| 101115122 | MVB12A       | 0.474049203  | 0.166311289 | 0.98686448   | 0.000000128  |
| 101117328 | CLTB         | 0.437198994  | 0.206420241 | 0.986819966  | 0.00000013   |
| 101121000 | ERC1         | 0.571074993  | 0.084650096 | 0.54934676   | 0.100007499  |
| 101123490 | BBC3         | 0.521107688  | 0.122452107 | 0.986776638  | 0.000000132  |
| 101120239 | CSNK1G2      | 0.484534415  | 0.155828591 | 0.986707293  | 0.000000134  |
| 101114329 | MOSMO        | 0.569485086  | 0.085718679 | 0.407816049  | 0.242051501  |
| 101108076 | TFPT         | 0.532713586  | 0.112882192 | 0.986704727  | 0.000000135  |
| 105604619 | FLYWCH1      | 0.509774703  | 0.132268628 | 0.986673383  | 0.000000136  |
| 101103837 | ABTB2        | 0.44103871   | 0.202003016 | 0.986518767  | 0.000000142  |
| 101117254 | GSDMD        | 0.391208721  | 0.263613134 | 0.986488035  | 0.000000143  |

|           |              |              |             |              |             |
|-----------|--------------|--------------|-------------|--------------|-------------|
| 101123281 | LOC101123281 | 0.45191203   | 0.189794744 | 0.986364566  | 0.000000149 |
| 101116740 | RAB20        | 0.391371509  | 0.263396834 | 0.986282377  | 0.000000152 |
| 100294652 | AKT1         | 0.42556592   | 0.220140706 | 0.986277944  | 0.000000153 |
| 101104932 | UCP2         | 0.389655818  | 0.265681406 | 0.986261487  | 0.000000153 |
| 101123002 | EMILIN2      | 0.528335208  | 0.116435417 | 0.986232205  | 0.000000155 |
| 101106700 | RPL38        | 0.564822082  | 0.088902533 | 0.541323072  | 0.106095458 |
| 105611679 | -            | 0.500474328  | 0.140675962 | 0.986208545  | 0.000000156 |
| 101121851 | NDUFB7       | 0.397169809  | 0.255756284 | 0.986190981  | 0.000000156 |
| 443417    | TGFB1        | 0.414442582  | 0.233733985 | 0.986190573  | 0.000000156 |
| 101110745 | PPP1R16A     | 0.516209962  | 0.126636996 | 0.986179623  | 0.000000157 |
| 101122898 | NKAPL        | 0.562277346  | 0.090671546 | 0.50827451   | 0.133603266 |
| 105613844 | -            | 0.516209962  | 0.126636996 | 0.986179623  | 0.000000157 |
| 101102849 | VAR51        | 0.560995236  | 0.091571286 | 0.698965771  | 0.02450773  |
| 101118553 | CEBPA        | 0.516209962  | 0.126636996 | 0.986179623  | 0.000000157 |
| 101116724 | -            | 0.559934432  | 0.092320018 | 0.508837004  | 0.133101879 |
| 100174903 | NR1D1        | 0.47111149   | 0.169321962 | 0.986164393  | 0.000000158 |
| 101118551 | PLD3         | 0.520922872  | 0.122608441 | 0.986105579  | 0.00000016  |
| 101113996 | SYTL1        | 0.512146159  | 0.130175698 | 0.98581767   | 0.000000174 |
| 101120606 | MZT2B        | 0.456919073  | 0.184322304 | 0.985797745  | 0.000000175 |
| 101123545 | EHMT1        | 0.45948071   | 0.181558966 | 0.985768619  | 0.000000176 |
| 101110230 | LOC101110230 | 0.472311204  | 0.168088551 | 0.985583317  | 0.000000186 |
| 105608442 | LOC105608442 | 0.420490887  | 0.226285262 | 0.985515742  | 0.000000189 |
| 101106011 | BDH2         | -0.555674369 | 0.095366148 | -0.547418019 | 0.101450178 |
| 101116642 | MCAT         | 0.49420351   | 0.146524673 | 0.985398101  | 0.000000195 |
| 101118997 | SACM1L       | -0.555341448 | 0.09560686  | -0.655866468 | 0.039475565 |
| 101114619 | GRINA        | 0.413757934  | 0.234585762 | 0.985361068  | 0.000000197 |
| 101121289 | KMT5C        | 0.490998886  | 0.149569799 | 0.985308024  | 0.0000002   |
| 101119171 | ATG2A        | 0.426000687  | 0.2196188   | 0.985211351  | 0.000000206 |
| 101110633 | TMEM134      | 0.487051917  | 0.153372714 | 0.98517423   | 0.000000208 |
| 101111647 | CSRP1        | 0.491449288  | 0.149139514 | 0.985169755  | 0.000000208 |
| 105614996 | LOC105614996 | 0.432564477  | 0.211825527 | 0.985167893  | 0.000000208 |
| 105607861 | LOC105607861 | 0.464352033  | 0.176372014 | 0.985099653  | 0.000000212 |
| 101105692 | GPR132       | 0.501828407  | 0.139432101 | 0.984980895  | 0.000000219 |

|           |              |              |             |              |             |
|-----------|--------------|--------------|-------------|--------------|-------------|
| 105614076 | LOC105614076 | 0.55316502   | 0.097190013 | 0.680694005  | 0.030265302 |
| 101122706 | TMEM11       | 0.450115071  | 0.191781688 | 0.984936991  | 0.000000221 |
| 101103231 | MRPL55       | 0.416607948  | 0.231051549 | 0.984926166  | 0.000000222 |
| 101109655 | LOC101109655 | 0.437593137  | 0.205964268 | 0.984892441  | 0.000000224 |
| 101108527 | ANKRD13D     | 0.478058118  | 0.162254876 | 0.984793482  | 0.00000023  |
| 101107304 | MBOAT7       | 0.376048446  | 0.284183031 | 0.984786819  | 0.00000023  |
| 101119304 | LTC4S        | 0.458637604  | 0.182465738 | 0.984698667  | 0.000000235 |
| 101106012 | PDGFRA       | -0.550886618 | 0.09886509  | -0.788775184 | 0.006689788 |
| 101123600 | CREBBP       | -0.550765868 | 0.098954373 | -0.78107117  | 0.007643452 |
| 101114566 | RANBP9       | -0.550701668 | 0.099001863 | -0.692088748 | 0.026577564 |
| 101111994 | RPS5         | 0.397670355  | 0.255102526 | 0.984697935  | 0.000000235 |
| 101105105 | CRYBA4       | 0.548964999  | 0.100292014 | 0.659169268  | 0.038153895 |
| 101120012 | ISOC2        | 0.437928998  | 0.205576179 | 0.984526818  | 0.000000246 |
| 105615377 | LOC105615377 | 0.510369587  | 0.131741677 | 0.984442717  | 0.000000252 |
| 105610494 | MISP3        | 0.480045404  | 0.160266299 | 0.984434928  | 0.000000252 |
| 101112814 | YJU2         | 0.548173258  | 0.100883707 | 0.677282832  | 0.031433624 |
| 101108171 | LOC101108171 | 0.476046945  | 0.16428237  | 0.98434685   | 0.000000258 |
| 101105488 | EDF1         | 0.498278383  | 0.142707551 | 0.984166332  | 0.00000027  |
| 101112263 | RIN3         | 0.439254484  | 0.204048711 | 0.984154977  | 0.000000271 |
| 105611364 | -            | 0.473792452  | 0.166573129 | 0.984085521  | 0.000000275 |
| 101115666 | AVPI1        | 0.436785056  | 0.206899742 | 0.983977325  | 0.000000283 |
| 101103115 | MCRIP2       | 0.41288729   | 0.235671464 | 0.98396632   | 0.000000284 |
| 101118722 | MON1B        | 0.474889536  | 0.165456023 | 0.983922391  | 0.000000287 |
| 101103418 | NOP53        | 0.472356156  | 0.168042441 | 0.983861499  | 0.000000291 |
| 101121558 | PTGDR2       | 0.421147884  | 0.225484377 | 0.983825308  | 0.000000294 |
| 101101937 | SIPA1        | 0.388848322  | 0.266760397 | 0.983671748  | 0.000000305 |
| 100190977 | CKB          | 0.422895467  | 0.223361919 | 0.983668026  | 0.000000305 |
| 101117865 | ROMO1        | 0.456515804  | 0.184759571 | 0.983605285  | 0.00000031  |
| 101109080 | -            | 0.407755312  | 0.242128493 | 0.983555115  | 0.000000314 |
| 101103616 | LOC101103616 | 0.473058605  | 0.16732288  | 0.983516461  | 0.000000317 |
| 101119721 | LOC101119721 | 0.484142228  | 0.156213302 | 0.983351615  | 0.000000329 |
| 101122954 | CEBPE        | 0.453443727  | 0.188110683 | 0.983300226  | 0.000000333 |
| 101121678 | LEAP2        | -0.543874027 | 0.104135246 | -0.653456242 | 0.040459284 |



|           |              |              |             |              |             |
|-----------|--------------|--------------|-------------|--------------|-------------|
| 101116560 | CARD9        | 0.40954135   | 0.239870181 | 0.983296229  | 0.000000334 |
| 101104451 | ANKMY1       | 0.462598377  | 0.17822904  | 0.983100284  | 0.00000035  |
| 443466    | PRLH         | 0.462598377  | 0.17822904  | 0.983100284  | 0.00000035  |
| 443051    | COL6A3       | 0.462598377  | 0.17822904  | 0.983100284  | 0.00000035  |
| 101113454 | NGEF         | 0.462598377  | 0.17822904  | 0.983100284  | 0.00000035  |
| 105615733 | LOC105615733 | 0.462598377  | 0.17822904  | 0.983100284  | 0.00000035  |
| 101111757 | PDE4B        | -0.541122547 | 0.106250524 | -0.858867621 | 0.001458715 |
| 101105789 | S100A16      | 0.462598377  | 0.17822904  | 0.983100284  | 0.00000035  |
| 106990787 | -            | 0.462598377  | 0.17822904  | 0.983100284  | 0.00000035  |
| 101106557 | NES          | 0.462598377  | 0.17822904  | 0.983100284  | 0.00000035  |
| 101108266 | INSRR        | 0.462598377  | 0.17822904  | 0.983100284  | 0.00000035  |
| 105608968 | ETV3L        | 0.462598377  | 0.17822904  | 0.983100284  | 0.00000035  |
| 101116526 | IGSF9        | 0.462598377  | 0.17822904  | 0.983100284  | 0.00000035  |
| 105612162 | LOC105612162 | 0.462598377  | 0.17822904  | 0.983100284  | 0.00000035  |
| 101123569 | SUPT4H1      | 0.5377499    | 0.108880032 | 0.643032484  | 0.044903539 |
| 105606224 | LOC105606224 | 0.537313907  | 0.109222915 | 0.678259354  | 0.031096086 |
| 101106565 | ADAMTS4      | 0.462598377  | 0.17822904  | 0.983100284  | 0.00000035  |
| 443370    | POU1F1       | 0.462598377  | 0.17822904  | 0.983100284  | 0.00000035  |
| 101120424 | RNF213       | -0.536569592 | 0.109809841 | -0.609614885 | 0.061322529 |
| 101120035 | TMPRSS7      | 0.462598377  | 0.17822904  | 0.983100284  | 0.00000035  |
| 105605206 | LOC105605206 | 0.462598377  | 0.17822904  | 0.983100284  | 0.00000035  |
| 105602871 | -            | 0.534838195  | 0.111182785 | 0.428641271  | 0.216464182 |
| 101113459 | SVEP1        | 0.462598377  | 0.17822904  | 0.983100284  | 0.00000035  |
| 101120217 | CCL19        | 0.462598377  | 0.17822904  | 0.983100284  | 0.00000035  |
| 101122581 | LGI3         | 0.462598377  | 0.17822904  | 0.983100284  | 0.00000035  |
| 101116452 | -            | 0.462598377  | 0.17822904  | 0.983100284  | 0.00000035  |
| 101103123 | TRPM3        | 0.462598377  | 0.17822904  | 0.983100284  | 0.00000035  |
| 101107766 | SCARA3       | 0.462598377  | 0.17822904  | 0.983100284  | 0.00000035  |
| 101107834 | FILIP1L      | 0.533974342  | 0.111871803 | 0.675350425  | 0.032108894 |
| 101115683 | PNOC         | 0.462598377  | 0.17822904  | 0.983100284  | 0.00000035  |
| 101110914 | XKR6         | 0.462598377  | 0.17822904  | 0.983100284  | 0.00000035  |
| 105610586 | -            | 0.462598377  | 0.17822904  | 0.983100284  | 0.00000035  |
| 105601905 | -            | 0.462598377  | 0.17822904  | 0.983100284  | 0.00000035  |

|           |              |              |             |              |             |
|-----------|--------------|--------------|-------------|--------------|-------------|
| 101111646 | SLC26A9      | 0.532665286  | 0.112921014 | 0.694389718  | 0.025872194 |
| 101109421 | AKR7A2       | 0.462598377  | 0.17822904  | 0.983100284  | 0.00000035  |
| 101109254 | CROCC        | 0.462598377  | 0.17822904  | 0.983100284  | 0.00000035  |
| 106990978 | -            | 0.462598377  | 0.17822904  | 0.983100284  | 0.00000035  |
| 101116818 | GPSM1        | 0.462598377  | 0.17822904  | 0.983100284  | 0.00000035  |
| 101115521 | NTMT1        | 0.462598377  | 0.17822904  | 0.983100284  | 0.00000035  |
| 101107182 | WDR34        | 0.462598377  | 0.17822904  | 0.983100284  | 0.00000035  |
| 443143    | ITGAV        | -0.530503652 | 0.114667026 | -0.813536018 | 0.004194896 |
| 105607466 | LOC105607466 | 0.462598377  | 0.17822904  | 0.983100284  | 0.00000035  |
| 443212    | POMC         | 0.462598377  | 0.17822904  | 0.983100284  | 0.00000035  |
| 101113576 | TOGARAM2     | 0.462598377  | 0.17822904  | 0.983100284  | 0.00000035  |
| 101108731 | SMYD1        | 0.462598377  | 0.17822904  | 0.983100284  | 0.00000035  |
| 106991019 | LOC106991019 | 0.462598377  | 0.17822904  | 0.983100284  | 0.00000035  |
| 101111446 | LOC101111446 | 0.462598377  | 0.17822904  | 0.983100284  | 0.00000035  |
| 101114768 | KCNK12       | 0.462598377  | 0.17822904  | 0.983100284  | 0.00000035  |
| 101116471 | PROM2        | 0.462598377  | 0.17822904  | 0.983100284  | 0.00000035  |
| 105611974 | -            | 0.462598377  | 0.17822904  | 0.983100284  | 0.00000035  |
| 105614699 | LOC105614699 | 0.462598377  | 0.17822904  | 0.983100284  | 0.00000035  |
| 101107946 | ALX1         | 0.462598377  | 0.17822904  | 0.983100284  | 0.00000035  |
| 105614796 | -            | 0.462598377  | 0.17822904  | 0.983100284  | 0.00000035  |
| 101105069 | LOC101105069 | 0.462598377  | 0.17822904  | 0.983100284  | 0.00000035  |
| 101104343 | PTGER4       | -0.527594884 | 0.117043038 | -0.6308705   | 0.05048825  |
| 106991037 | LOC106991037 | 0.462598377  | 0.17822904  | 0.983100284  | 0.00000035  |
| 101112975 | TEAD4        | 0.462598377  | 0.17822904  | 0.983100284  | 0.00000035  |
| 101114265 | DDX11        | 0.462598377  | 0.17822904  | 0.983100284  | 0.00000035  |
| 101111621 | CSDC2        | 0.462598377  | 0.17822904  | 0.983100284  | 0.00000035  |
| 101113279 | LOC101113279 | 0.526749374  | 0.117739408 | 0.570427191  | 0.085084446 |
| 101105651 | LOC101105651 | 0.462598377  | 0.17822904  | 0.983100284  | 0.00000035  |
| 100037704 | FBLN1        | 0.462598377  | 0.17822904  | 0.983100284  | 0.00000035  |
| 101113671 | LOC101113671 | 0.462598377  | 0.17822904  | 0.983100284  | 0.00000035  |
| 101114186 | MLC1         | 0.462598377  | 0.17822904  | 0.983100284  | 0.00000035  |
| 101117495 | LMF2         | 0.462598377  | 0.17822904  | 0.983100284  | 0.00000035  |
| 105609617 | LOC105609617 | 0.462598377  | 0.17822904  | 0.983100284  | 0.00000035  |

|           |              |              |             |              |             |
|-----------|--------------|--------------|-------------|--------------|-------------|
| 101123549 | LOC101123549 | 0.462598377  | 0.17822904  | 0.983100284  | 0.00000035  |
| 101104655 | FLNC         | 0.462598377  | 0.17822904  | 0.983100284  | 0.00000035  |
| 105609822 | LOC105609822 | 0.462598377  | 0.17822904  | 0.983100284  | 0.00000035  |
| 101104760 | LACTB2       | -0.525359719 | 0.118889548 | -0.875497127 | 0.000902171 |
| 101104575 | YJEFN3       | 0.462598377  | 0.17822904  | 0.983100284  | 0.00000035  |
| 101107353 | GDF1         | 0.462598377  | 0.17822904  | 0.983100284  | 0.00000035  |
| 101108387 | KLHL26       | 0.462598377  | 0.17822904  | 0.983100284  | 0.00000035  |
| 443102    | JUND         | 0.462598377  | 0.17822904  | 0.983100284  | 0.00000035  |
| 101111628 | LOC101111628 | 0.462598377  | 0.17822904  | 0.983100284  | 0.00000035  |
| 102465821 | MIR23A       | 0.462598377  | 0.17822904  | 0.983100284  | 0.00000035  |
| 102465824 | MIR27A       | 0.462598377  | 0.17822904  | 0.983100284  | 0.00000035  |
| 101103719 | NFIX         | 0.462598377  | 0.17822904  | 0.983100284  | 0.00000035  |
| 101120080 | TSPAN16      | 0.462598377  | 0.17822904  | 0.983100284  | 0.00000035  |
| 443517    | CNN1         | 0.462598377  | 0.17822904  | 0.983100284  | 0.00000035  |
| 101121854 | LOC101121854 | 0.462598377  | 0.17822904  | 0.983100284  | 0.00000035  |
| 101112564 | FSD1         | 0.462598377  | 0.17822904  | 0.983100284  | 0.00000035  |
| 101101785 | -            | 0.523631465  | 0.120329666 | 0.698461677  | 0.024655559 |
| 101116907 | ZFR2         | 0.462598377  | 0.17822904  | 0.983100284  | 0.00000035  |
| 105608683 | LOC105608683 | 0.462598377  | 0.17822904  | 0.983100284  | 0.00000035  |
| 101122946 | PRR7         | 0.462598377  | 0.17822904  | 0.983100284  | 0.00000035  |
| 101101781 | -            | 0.462598377  | 0.17822904  | 0.983100284  | 0.00000035  |
| 101115458 | APC2         | 0.462598377  | 0.17822904  | 0.983100284  | 0.00000035  |
| 101109876 | GFRA3        | 0.462598377  | 0.17822904  | 0.983100284  | 0.00000035  |
| 101115622 | C1QTNF2      | 0.462598377  | 0.17822904  | 0.983100284  | 0.00000035  |
| 105613852 | -            | 0.462598377  | 0.17822904  | 0.983100284  | 0.00000035  |
| 101111286 | LOC101111286 | 0.462598377  | 0.17822904  | 0.983100284  | 0.00000035  |
| 101112060 | LOC101112060 | 0.462598377  | 0.17822904  | 0.983100284  | 0.00000035  |
| 101123558 | DMP1         | 0.462598377  | 0.17822904  | 0.983100284  | 0.00000035  |
| 106991243 | -            | 0.462598377  | 0.17822904  | 0.983100284  | 0.00000035  |
| 101103648 | NSD2         | 0.462598377  | 0.17822904  | 0.983100284  | 0.00000035  |
| 101113761 | LOC101113761 | 0.462598377  | 0.17822904  | 0.983100284  | 0.00000035  |
| 101114446 | FOXB1        | 0.462598377  | 0.17822904  | 0.983100284  | 0.00000035  |
| 105615794 | -            | 0.462598377  | 0.17822904  | 0.983100284  | 0.00000035  |

|           |              |              |             |              |             |
|-----------|--------------|--------------|-------------|--------------|-------------|
| 105611043 | -            | 0.462598377  | 0.17822904  | 0.983100284  | 0.00000035  |
| 105611045 | -            | 0.462598377  | 0.17822904  | 0.983100284  | 0.00000035  |
| 101111811 | LOC101111811 | 0.462598377  | 0.17822904  | 0.983100284  | 0.00000035  |
| 100620047 | BTG2         | -0.519189243 | 0.124080939 | -0.398142138 | 0.254487183 |
| 105615913 | -            | 0.462598377  | 0.17822904  | 0.983100284  | 0.00000035  |
| 101107530 | LOC101107530 | 0.462598377  | 0.17822904  | 0.983100284  | 0.00000035  |
| 105615969 | -            | 0.462598377  | 0.17822904  | 0.983100284  | 0.00000035  |
| 101118030 | C9H8orf82    | 0.462598377  | 0.17822904  | 0.983100284  | 0.00000035  |
| 105615980 | -            | 0.462598377  | 0.17822904  | 0.983100284  | 0.00000035  |
| 101113248 | TIGD5        | 0.462598377  | 0.17822904  | 0.983100284  | 0.00000035  |
| 101119647 | THEM6        | 0.462598377  | 0.17822904  | 0.983100284  | 0.00000035  |
| 101117854 | TSNARE1      | 0.462598377  | 0.17822904  | 0.983100284  | 0.00000035  |
| 101110246 | ZFHX4        | 0.462598377  | 0.17822904  | 0.983100284  | 0.00000035  |
| 101114786 | CALB1        | 0.462598377  | 0.17822904  | 0.983100284  | 0.00000035  |
| 101109190 | OXGR1        | 0.462598377  | 0.17822904  | 0.983100284  | 0.00000035  |
| 105616226 | -            | 0.462598377  | 0.17822904  | 0.983100284  | 0.00000035  |
| 105616295 | -            | 0.462598377  | 0.17822904  | 0.983100284  | 0.00000035  |
| 101112746 | SMTNL2       | 0.462598377  | 0.17822904  | 0.983100284  | 0.00000035  |
| 105607800 | NTN1         | 0.462598377  | 0.17822904  | 0.983100284  | 0.00000035  |
| 101104413 | MYOCD        | 0.462598377  | 0.17822904  | 0.983100284  | 0.00000035  |
| 106991422 | LOC106991422 | 0.462598377  | 0.17822904  | 0.983100284  | 0.00000035  |
| 101111562 | NXPH3        | 0.462598377  | 0.17822904  | 0.983100284  | 0.00000035  |
| 105610170 | LOC105610170 | 0.462598377  | 0.17822904  | 0.983100284  | 0.00000035  |
| 100141298 | KRT27        | 0.462598377  | 0.17822904  | 0.983100284  | 0.00000035  |
| 101118459 | LOC101118459 | 0.462598377  | 0.17822904  | 0.983100284  | 0.00000035  |
| 101110525 | CAVIN1       | 0.462598377  | 0.17822904  | 0.983100284  | 0.00000035  |
| 101105588 | LAMC1        | 0.513702109  | 0.128813673 | 0.503999456  | 0.137451874 |
| 106991404 | -            | 0.462598377  | 0.17822904  | 0.983100284  | 0.00000035  |
| 105616467 | TMEM235      | 0.462598377  | 0.17822904  | 0.983100284  | 0.00000035  |
| 101116847 | UBE2O        | 0.462598377  | 0.17822904  | 0.983100284  | 0.00000035  |
| 101120933 | CASKIN2      | 0.462598377  | 0.17822904  | 0.983100284  | 0.00000035  |
| 101123478 | HID1         | 0.462598377  | 0.17822904  | 0.983100284  | 0.00000035  |
| 101111414 | SMAD7        | 0.512252095  | 0.130082684 | 0.63893361   | 0.046737016 |

|           |              |              |             |              |             |
|-----------|--------------|--------------|-------------|--------------|-------------|
| 101102657 | FADS6        | 0.462598377  | 0.17822904  | 0.983100284  | 0.00000035  |
| 101108503 | LOC101108503 | 0.462598377  | 0.17822904  | 0.983100284  | 0.00000035  |
| 101122042 | GPR153       | 0.462598377  | 0.17822904  | 0.983100284  | 0.00000035  |
| 101123315 | TMEM52       | 0.462598377  | 0.17822904  | 0.983100284  | 0.00000035  |
| 101117093 | LOC101117093 | 0.462598377  | 0.17822904  | 0.983100284  | 0.00000035  |
| 101109907 | MPEG1        | 0.51013275   | 0.131951313 | 0.491904612  | 0.148705291 |
| 101112408 | PTPN14       | 0.462598377  | 0.17822904  | 0.983100284  | 0.00000035  |
| 101115892 | FRMD4A       | 0.462598377  | 0.17822904  | 0.983100284  | 0.00000035  |
| 443477    | AVP          | 0.462598377  | 0.17822904  | 0.983100284  | 0.00000035  |
| 105616788 | C13H20orf204 | 0.462598377  | 0.17822904  | 0.983100284  | 0.00000035  |
| 101117352 | TNFRSF6B     | 0.462598377  | 0.17822904  | 0.983100284  | 0.00000035  |
| 101110435 | BIRC7        | 0.462598377  | 0.17822904  | 0.983100284  | 0.00000035  |
| 101109469 | SNTA1        | 0.462598377  | 0.17822904  | 0.983100284  | 0.00000035  |
| 101120595 | LOC101120595 | 0.462598377  | 0.17822904  | 0.983100284  | 0.00000035  |
| 101106450 | LPIN3        | 0.462598377  | 0.17822904  | 0.983100284  | 0.00000035  |
| 100127216 | TNNC2        | 0.462598377  | 0.17822904  | 0.983100284  | 0.00000035  |
| 101123359 | EI24         | 0.507854914  | 0.133978035 | 0.617891242  | 0.056938124 |
| 101107201 | TBPL1        | -0.507645097 | 0.134165679 | -0.761359302 | 0.01051607  |
| 101117693 | BCAR1        | 0.462598377  | 0.17822904  | 0.983100284  | 0.00000035  |
| 101106278 | ZFPM1        | 0.462598377  | 0.17822904  | 0.983100284  | 0.00000035  |
| 101109036 | RGS9BP       | 0.462598377  | 0.17822904  | 0.983100284  | 0.00000035  |
| 101122717 | LOC101122717 | 0.462598377  | 0.17822904  | 0.983100284  | 0.00000035  |
| 106991536 | -            | 0.462598377  | 0.17822904  | 0.983100284  | 0.00000035  |
| 101115152 | PAK4         | 0.462598377  | 0.17822904  | 0.983100284  | 0.00000035  |
| 101105272 | LOC101105272 | 0.462598377  | 0.17822904  | 0.983100284  | 0.00000035  |
| 101107624 | -            | 0.462598377  | 0.17822904  | 0.983100284  | 0.00000035  |
| 101115564 | -            | 0.462598377  | 0.17822904  | 0.983100284  | 0.00000035  |
| 101103177 | EHD2         | 0.462598377  | 0.17822904  | 0.983100284  | 0.00000035  |
| 101121794 | SYNGR4       | 0.462598377  | 0.17822904  | 0.983100284  | 0.00000035  |
| 101116251 | KCNC3        | 0.462598377  | 0.17822904  | 0.983100284  | 0.00000035  |
| 101119583 | ACP4         | 0.462598377  | 0.17822904  | 0.983100284  | 0.00000035  |
| 101119751 | ZNF628       | 0.462598377  | 0.17822904  | 0.983100284  | 0.00000035  |
| 105601888 | LOC105601888 | 0.505533919  | 0.136062747 | 0.40147077   | 0.250169096 |

|           |              |              |             |              |             |
|-----------|--------------|--------------|-------------|--------------|-------------|
| 101102936 | WDR20        | -0.50551144  | 0.136083034 | -0.518238123 | 0.124893437 |
| 101117205 | DOCK1        | 0.505104257  | 0.136450841 | 0.698749167  | 0.024571176 |
| 101111997 | ZIM2         | 0.462598377  | 0.17822904  | 0.983100284  | 0.00000035  |
| 101122381 | LOC101122381 | 0.462598377  | 0.17822904  | 0.983100284  | 0.00000035  |
| 105602149 | -            | 0.462598377  | 0.17822904  | 0.983100284  | 0.00000035  |
| 101122219 | HSPA4L       | -0.504303163 | 0.137176245 | -0.622720588 | 0.054478124 |
| 101107895 | HSPB2        | 0.462598377  | 0.17822904  | 0.983100284  | 0.00000035  |
| 101109209 | TTC12        | 0.462598377  | 0.17822904  | 0.983100284  | 0.00000035  |
| 101120522 | ABCC8        | 0.462598377  | 0.17822904  | 0.983100284  | 0.00000035  |
| 101112085 | OLFML1       | 0.462598377  | 0.17822904  | 0.983100284  | 0.00000035  |
| 101102175 | LOC101102175 | 0.462598377  | 0.17822904  | 0.983100284  | 0.00000035  |
| 101123662 | LOC101123662 | 0.462598377  | 0.17822904  | 0.983100284  | 0.00000035  |
| 101113882 | CREB3L1      | 0.462598377  | 0.17822904  | 0.983100284  | 0.00000035  |
| 106991626 | -            | 0.462598377  | 0.17822904  | 0.983100284  | 0.00000035  |
| 101119671 | TNKS1BP1     | 0.462598377  | 0.17822904  | 0.983100284  | 0.00000035  |
| 105611415 | RTN4RL2      | 0.462598377  | 0.17822904  | 0.983100284  | 0.00000035  |
| 101103182 | LOC101103182 | 0.462598377  | 0.17822904  | 0.983100284  | 0.00000035  |
| 101105358 | RGS7BP       | 0.462598377  | 0.17822904  | 0.983100284  | 0.00000035  |
| 105602559 | LOC105602559 | 0.462598377  | 0.17822904  | 0.983100284  | 0.00000035  |
| 101110873 | LOC101110873 | 0.462598377  | 0.17822904  | 0.983100284  | 0.00000035  |
| 443306    | FGF2         | 0.462598377  | 0.17822904  | 0.983100284  | 0.00000035  |
| 101108257 | -            | 0.462598377  | 0.17822904  | 0.983100284  | 0.00000035  |
| 101117536 | LOC101117536 | 0.462598377  | 0.17822904  | 0.983100284  | 0.00000035  |
| 105603291 | -            | 0.462598377  | 0.17822904  | 0.983100284  | 0.00000035  |
| 101102516 | -            | 0.462598377  | 0.17822904  | 0.983100284  | 0.00000035  |
| 101113627 | LOC101113627 | 0.462598377  | 0.17822904  | 0.983100284  | 0.00000035  |
| 101114142 | ADAMTS7      | 0.462598377  | 0.17822904  | 0.983100284  | 0.00000035  |
| 101103270 | ISL2         | 0.462598377  | 0.17822904  | 0.983100284  | 0.00000035  |
| 101111492 | GPR68        | 0.462598377  | 0.17822904  | 0.983100284  | 0.00000035  |
| 101114907 | CHGA         | 0.462598377  | 0.17822904  | 0.983100284  | 0.00000035  |
| 105603225 | LOC105603225 | 0.462598377  | 0.17822904  | 0.983100284  | 0.00000035  |
| 105601847 | -            | 0.462598377  | 0.17822904  | 0.983100284  | 0.00000035  |
| 101102182 | TRMT61A      | 0.462598377  | 0.17822904  | 0.983100284  | 0.00000035  |

|           |              |             |             |              |             |
|-----------|--------------|-------------|-------------|--------------|-------------|
| 101108429 | PXK          | -0.50041931 | 0.140726645 | -0.651330643 | 0.041340404 |
| 105603311 | XRCC3        | 0.462598377 | 0.17822904  | 0.983100284  | 0.00000035  |
| 105603281 | AHNAK2       | 0.462598377 | 0.17822904  | 0.983100284  | 0.00000035  |
| 105610561 | LOC105610561 | 0.462598377 | 0.17822904  | 0.983100284  | 0.00000035  |
| 101112092 | TTC21A       | 0.462598377 | 0.17822904  | 0.983100284  | 0.00000035  |
| 101119338 | ZBTB47       | 0.462598377 | 0.17822904  | 0.983100284  | 0.00000035  |
| 101119258 | C19H3orf86   | 0.462598377 | 0.17822904  | 0.983100284  | 0.00000035  |
| 105603438 | -            | 0.462598377 | 0.17822904  | 0.983100284  | 0.00000035  |
| 101119261 | COL7A1       | 0.462598377 | 0.17822904  | 0.983100284  | 0.00000035  |
| 101112006 | EFCC1        | 0.462598377 | 0.17822904  | 0.983100284  | 0.00000035  |
| 101114819 | SLC41A3      | 0.462598377 | 0.17822904  | 0.983100284  | 0.00000035  |
| 105603655 | -            | 0.462598377 | 0.17822904  | 0.983100284  | 0.00000035  |
| 101103274 | DAAM2        | 0.462598377 | 0.17822904  | 0.983100284  | 0.00000035  |
| 105603708 | LOC105603708 | 0.462598377 | 0.17822904  | 0.983100284  | 0.00000035  |
| 101106292 | LOC101106292 | 0.462598377 | 0.17822904  | 0.983100284  | 0.00000035  |
| 101105036 | LOC101105036 | 0.462598377 | 0.17822904  | 0.983100284  | 0.00000035  |
| 101110711 | LOC101110711 | 0.462598377 | 0.17822904  | 0.983100284  | 0.00000035  |
| 105603946 | -            | 0.462598377 | 0.17822904  | 0.983100284  | 0.00000035  |
| 106990154 | -            | 0.462598377 | 0.17822904  | 0.983100284  | 0.00000035  |
| 105604163 | LOC105604163 | 0.462598377 | 0.17822904  | 0.983100284  | 0.00000035  |
| 101120120 | ANO5         | 0.462598377 | 0.17822904  | 0.983100284  | 0.00000035  |
| 101116360 | KCNK4        | 0.462598377 | 0.17822904  | 0.983100284  | 0.00000035  |
| 101108175 | SLC25A45     | 0.462598377 | 0.17822904  | 0.983100284  | 0.00000035  |
| 101121388 | SYT8         | 0.462598377 | 0.17822904  | 0.983100284  | 0.00000035  |
| 106991827 | TOLLIP       | 0.462598377 | 0.17822904  | 0.983100284  | 0.00000035  |
| 101116947 | INSYN2A      | 0.462598377 | 0.17822904  | 0.983100284  | 0.00000035  |
| 101109756 | -            | 0.462598377 | 0.17822904  | 0.983100284  | 0.00000035  |
| 101105461 | GNAL         | 0.462598377 | 0.17822904  | 0.983100284  | 0.00000035  |
| 101123172 | LOC101123172 | 0.462598377 | 0.17822904  | 0.983100284  | 0.00000035  |
| 101120129 | SERPINB13    | 0.462598377 | 0.17822904  | 0.983100284  | 0.00000035  |
| 105604659 | LOC105604659 | 0.462598377 | 0.17822904  | 0.983100284  | 0.00000035  |
| 101112971 | LRP6         | 0.496667382 | 0.144209307 | 0.548607045  | 0.100559251 |
| 105604700 | -            | 0.462598377 | 0.17822904  | 0.983100284  | 0.00000035  |

|           |              |              |             |              |             |
|-----------|--------------|--------------|-------------|--------------|-------------|
| 101104957 | FBXL19       | 0.462598377  | 0.17822904  | 0.983100284  | 0.00000035  |
| 101114236 | FZD9         | 0.462598377  | 0.17822904  | 0.983100284  | 0.00000035  |
| 101114746 | LOC101114746 | 0.462598377  | 0.17822904  | 0.983100284  | 0.00000035  |
| 101117815 | SH2B2        | 0.462598377  | 0.17822904  | 0.983100284  | 0.00000035  |
| 101114925 | GPR146       | 0.462598377  | 0.17822904  | 0.983100284  | 0.00000035  |
| 101121567 | ADO          | 0.462598377  | 0.17822904  | 0.983100284  | 0.00000035  |
| 101122571 | LOC101122571 | 0.462598377  | 0.17822904  | 0.983100284  | 0.00000035  |
| 101107841 | HKDC1        | 0.462598377  | 0.17822904  | 0.983100284  | 0.00000035  |
| 100145877 | RIT1         | -0.496132338 | 0.144710192 | -0.71037213  | 0.021323348 |
| 101106391 | PLAC9        | 0.462598377  | 0.17822904  | 0.983100284  | 0.00000035  |
| 101102872 | MYOM2        | 0.462598377  | 0.17822904  | 0.983100284  | 0.00000035  |
| 101119723 | PCYOX1L      | 0.495932276  | 0.144897753 | 0.691090007  | 0.026887787 |
| 105601914 | -            | 0.462598377  | 0.17822904  | 0.983100284  | 0.00000035  |
| 105611964 | ASMTL        | 0.462598377  | 0.17822904  | 0.983100284  | 0.00000035  |
| 101102784 | LOC101102784 | 0.462598377  | 0.17822904  | 0.983100284  | 0.00000035  |
| 101120990 | EDA          | 0.462598377  | 0.17822904  | 0.983100284  | 0.00000035  |
| 101105981 | RTL8C        | 0.462598377  | 0.17822904  | 0.983100284  | 0.00000035  |
| 101113311 | CHRD1        | 0.462598377  | 0.17822904  | 0.983100284  | 0.00000035  |
| 100233168 | BSP5L        | 0.462598377  | 0.17822904  | 0.983100284  | 0.00000035  |
| 101116713 | -            | 0.462598377  | 0.17822904  | 0.983100284  | 0.00000035  |
| 101111169 | ABCA2        | 0.462598377  | 0.17822904  | 0.983100284  | 0.00000035  |
| 101104154 | REM2         | -0.493490894 | 0.147198529 | -0.564864223 | 0.088873425 |
| 105605780 | LOC105605780 | 0.462598377  | 0.17822904  | 0.983100284  | 0.00000035  |
| 101115103 | -            | 0.462598377  | 0.17822904  | 0.983100284  | 0.00000035  |
| 101106314 | -            | 0.462598377  | 0.17822904  | 0.983100284  | 0.00000035  |
| 105605880 | -            | 0.462598377  | 0.17822904  | 0.983100284  | 0.00000035  |
| 105605891 | -            | 0.462598377  | 0.17822904  | 0.983100284  | 0.00000035  |
| 101123615 | -            | 0.462598377  | 0.17822904  | 0.983100284  | 0.00000035  |
| 105605954 | LOC105605954 | 0.462598377  | 0.17822904  | 0.983100284  | 0.00000035  |
| 101104726 | LOC101104726 | 0.462598377  | 0.17822904  | 0.983100284  | 0.00000035  |
| 101119804 | -            | 0.462598377  | 0.17822904  | 0.983100284  | 0.00000035  |
| 101102799 | SPSB2        | 0.462598377  | 0.17822904  | 0.983100284  | 0.00000035  |
| 105606098 | -            | 0.462598377  | 0.17822904  | 0.983100284  | 0.00000035  |



|           |              |              |             |              |             |
|-----------|--------------|--------------|-------------|--------------|-------------|
| 105606140 | -            | 0.462598377  | 0.17822904  | 0.983100284  | 0.00000035  |
| 101106245 | MICALL2      | 0.462598377  | 0.17822904  | 0.983100284  | 0.00000035  |
| 101108597 | KCNN4        | 0.496738345  | 0.144142954 | 0.983045324  | 0.000000354 |
| 101110154 | TP53I13      | 0.447105456  | 0.195136666 | 0.983014518  | 0.000000357 |
| 101117761 | S1PR5        | 0.52194845   | 0.121742479 | 0.982986853  | 0.000000359 |
| 105606118 | -            | 0.458787944  | 0.18230385  | 0.982738964  | 0.00000038  |
| 101117529 | EMC10        | 0.402464988  | 0.248887304 | 0.982653689  | 0.000000388 |
| 101117537 | CRKL         | 0.481248644  | 0.159069441 | 0.982645489  | 0.000000389 |
| 101120352 | UBE2S        | 0.435860157  | 0.207973461 | 0.982627659  | 0.00000039  |
| 101114121 | ANAPC11      | 0.458441465  | 0.182677071 | 0.982443802  | 0.000000407 |
| 101114723 | C15H11orf71  | 0.486338031  | 0.154066729 | 0.98240443   | 0.000000411 |
| 101122842 | FAM160B2     | 0.477918136  | 0.162395504 | 0.982398006  | 0.000000411 |
| 101103935 | RASSF7       | 0.400330531  | 0.251643656 | 0.982314498  | 0.000000419 |
| 100579169 | GSN          | 0.377996548  | 0.281492738 | 0.982236322  | 0.000000426 |
| 106991688 | -            | 0.454961055  | 0.186451107 | 0.982178594  | 0.000000432 |
| 101122286 | LOC101122286 | 0.457847033  | 0.183318432 | 0.982096551  | 0.00000044  |
| 101115287 | GLI4         | 0.499013487  | 0.142025483 | 0.982019741  | 0.000000447 |
| 443200    | TJP1         | -0.489108965 | 0.15138352  | -0.716766543 | 0.019669327 |
| 101105714 | PPP1R35      | 0.386038693  | 0.270533347 | 0.981906155  | 0.000000459 |
| 101114831 | SPINDOC      | 0.472196586  | 0.168206156 | 0.981808037  | 0.000000469 |
| 101105148 | IER5L        | 0.430106062  | 0.214725515 | 0.981788099  | 0.000000471 |
| 101114282 | RHPN1        | 0.516797852  | 0.126130059 | 0.98172845   | 0.000000477 |
| 101117526 | E2F1         | 0.50033416   | 0.140805107 | 0.981576743  | 0.000000493 |
| 101102078 | LOC101102078 | -0.487844384 | 0.152604524 | -0.670475157 | 0.033856196 |
| 101107795 | LOC101107795 | -0.487593765 | 0.152847213 | -0.53957011  | 0.107455864 |
| 101109908 | DCHS1        | 0.50033416   | 0.140805107 | 0.981576743  | 0.000000493 |
| 101106385 | TGFB111      | 0.50033416   | 0.140805107 | 0.981576743  | 0.000000493 |
| 101123196 | -            | 0.50033416   | 0.140805107 | 0.981576743  | 0.000000493 |
| 101109641 | ZNF787       | 0.50033416   | 0.140805107 | 0.981576743  | 0.000000493 |
| 101114495 | AKAP17A      | 0.50033416   | 0.140805107 | 0.981576743  | 0.000000493 |
| 105609798 | LOC105609798 | 0.50033416   | 0.140805107 | 0.981576743  | 0.000000493 |
| 101112869 | NUBP2        | 0.436660028  | 0.2070447   | 0.9815193    | 0.000000499 |
| 101112926 | ADORA2A      | 0.452055494  | 0.189636636 | 0.981426103  | 0.000000509 |

|           |              |              |             |              |             |
|-----------|--------------|--------------|-------------|--------------|-------------|
| 101114728 | TOP3B        | 0.455610935  | 0.185742946 | 0.98126015   | 0.000000528 |
| 101105235 | TRAF2        | 0.455610935  | 0.185742946 | 0.98126015   | 0.000000528 |
| 101112798 | GFI1B        | 0.501979351  | 0.139293862 | 0.981038131  | 0.000000553 |
| 105603312 | ZFYVE21      | 0.375101265  | 0.285496062 | 0.981004313  | 0.000000557 |
| 780454    | FURIN        | 0.432029306  | 0.212454894 | 0.98065115   | 0.000000599 |
| 101108996 | ATP13A2      | 0.521977691  | 0.121717845 | 0.980646784  | 0.0000006   |
| 101116998 | ING1         | 0.471144703  | 0.169287743 | 0.980589185  | 0.000000607 |
| 101115236 | LOC101115236 | 0.568316776  | 0.086509402 | 0.980496484  | 0.000000618 |
| 101122334 | BMP1         | 0.385352197  | 0.271459624 | 0.980444414  | 0.000000625 |
| 101119750 | BLVRB        | 0.350233796  | 0.321126161 | 0.980287149  | 0.000000645 |
| 101117502 | ATP5F1D      | 0.42195498   | 0.22450273  | 0.98016341   | 0.000000661 |
| 101106539 | ABHD12       | 0.377800052  | 0.281763468 | 0.98014933   | 0.000000663 |
| 101110527 | LOC101110527 | 0.401919834  | 0.249589688 | 0.980102262  | 0.00000067  |
| 101101973 | ARRDC1       | 0.474766111  | 0.165581477 | 0.979855677  | 0.000000703 |
| 101119378 | RHOT2        | 0.540218337  | 0.106951527 | 0.979769678  | 0.000000715 |
| 101113335 | LOC101113335 | 0.463486248  | 0.177287392 | 0.979757774  | 0.000000717 |
| 101111625 | CERK         | 0.457076476  | 0.184151797 | 0.979626452  | 0.000000736 |
| 101109746 | LOC101109746 | 0.482874635  | 0.15746065  | 0.691232661  | 0.026843326 |
| 101104038 | CLN8         | 0.418539774  | 0.228673199 | 0.979552123  | 0.000000746 |
| 101111585 | B3GALT4      | 0.449755555  | 0.192180671 | 0.979513808  | 0.000000752 |
| 101122673 | ABCD1        | 0.594853071  | 0.069682331 | 0.979418639  | 0.000000766 |
| 101107836 | CTDP1        | 0.466986549  | 0.173603879 | 0.979413823  | 0.000000766 |
| 101109923 | NDUFC2       | 0.481944126  | 0.158380109 | 0.587993552  | 0.073807376 |
| 101120808 | PGAP1        | -0.481927162 | 0.158396901 | -0.622502459 | 0.054587689 |
| 105605699 | -            | 0.430140065  | 0.21468525  | 0.979267125  | 0.000000788 |
| 101115549 | GPIHBP1      | 0.430140065  | 0.21468525  | 0.979267125  | 0.000000788 |
| 101119587 | SMPD4        | 0.430140065  | 0.21468525  | 0.979267125  | 0.000000788 |
| 101116550 | PLCXD1       | 0.430140065  | 0.21468525  | 0.979267125  | 0.000000788 |
| 105602000 | TMEM238      | 0.430140065  | 0.21468525  | 0.979267125  | 0.000000788 |
| 101119391 | RFX1         | 0.430140065  | 0.21468525  | 0.979267125  | 0.000000788 |
| 101110841 | ELANE        | 0.519028962  | 0.12421763  | 0.979255723  | 0.00000079  |
| 101115834 | PSMB9        | 0.428362301  | 0.216796224 | 0.979220813  | 0.000000795 |
| 101102135 | MPST         | 0.51566428   | 0.127108664 | 0.979203019  | 0.000000798 |

|           |              |             |             |             |             |
|-----------|--------------|-------------|-------------|-------------|-------------|
| 101111426 | EIF4EBP1     | 0.412652414 | 0.235964841 | 0.978942089 | 0.000000839 |
| 101115474 | ACOT8        | 0.373549275 | 0.287654558 | 0.978935246 | 0.00000084  |
| 105612424 | SSNA1        | 0.387388124 | 0.268717625 | 0.978754166 | 0.000000869 |
| 101102772 | LOC101102772 | 0.393515228 | 0.260557552 | 0.978448367 | 0.00000092  |
| 101113558 | ARPC1B       | 0.383798902 | 0.273561834 | 0.978347161 | 0.000000937 |
| 101105615 | B4GALNT4     | 0.586575385 | 0.074679528 | 0.97832766  | 0.00000094  |
| 101111911 | LOC101111911 | 0.405085325 | 0.245526618 | 0.978298952 | 0.000000945 |
| 443390    | OXT          | 0.461331054 | 0.179578246 | 0.978041848 | 0.000000991 |
| 101119612 | DOK2         | 0.426657452 | 0.218831743 | 0.978034496 | 0.000000992 |
| 101117439 | FAM171A1     | 0.478524586 | 0.161786781 | 0.591478904 | 0.071692126 |
| 101106897 | MGMT         | 0.47899301  | 0.16131754  | 0.977973159 | 0.000001    |
| 101111705 | SLC2A6       | 0.381024077 | 0.277339233 | 0.977949638 | 0.00000101  |
| 101111737 | ACTN4        | 0.337211803 | 0.340660865 | 0.977925495 | 0.00000101  |
| 100302072 | RABAC1       | 0.361102248 | 0.305280925 | 0.977724587 | 0.00000105  |
| 101118219 | ARHGAP1      | 0.523442982 | 0.120487378 | 0.977593948 | 0.00000107  |
| 105606828 | -            | 0.51698997  | 0.125964669 | 0.977572871 | 0.00000108  |
| 100302099 | CD93         | 0.492524226 | 0.148115627 | 0.977438735 | 0.0000011   |
| 101115274 | B4GALNT3     | 0.528798794 | 0.116055935 | 0.977400559 | 0.00000111  |
| 101122371 | DPT          | 0.528798794 | 0.116055935 | 0.977400559 | 0.00000111  |
| 105606890 | LOC105606890 | 0.528798794 | 0.116055935 | 0.977400559 | 0.00000111  |
| 101111903 | PRDM11       | 0.528798794 | 0.116055935 | 0.977400559 | 0.00000111  |
| 105604490 | LOC105604490 | 0.528798794 | 0.116055935 | 0.977400559 | 0.00000111  |
| 101117012 | POLD1        | 0.407503465 | 0.242447889 | 0.977354338 | 0.00000112  |
| 101119148 | UNC13D       | 0.390636241 | 0.264374572 | 0.977312766 | 0.00000113  |
| 101104910 | CTBP1        | 0.444783915 | 0.197747859 | 0.977312042 | 0.00000113  |
| 101118349 | KCNT1        | 0.434914208 | 0.209074936 | 0.977211106 | 0.00000115  |
| 101101968 | CAPG         | 0.385424721 | 0.271361686 | 0.977184079 | 0.00000115  |
| 101110452 | SF3A1        | 0.475024252 | 0.165319159 | 0.484588792 | 0.155775296 |
| 101118471 | ZNF524       | 0.471043854 | 0.169391657 | 0.976685058 | 0.00000126  |
| 101113469 | EIPR1        | 0.467088959 | 0.1734968   | 0.976531535 | 0.00000129  |
| 101115557 | LOC101115557 | 0.365656008 | 0.298767496 | 0.976447632 | 0.00000131  |
| 101115330 | FERMT3       | 0.405471591 | 0.245033373 | 0.976378542 | 0.00000132  |
| 101112239 | ENGASE       | 0.462331925 | 0.178512207 | 0.976212764 | 0.00000136  |

|           |              |              |             |              |             |
|-----------|--------------|--------------|-------------|--------------|-------------|
| 443003    | ATP6VOC      | 0.49267533   | 0.147972044 | 0.976205374  | 0.00000136  |
| 101120652 | TOM1         | 0.472004293  | 0.16840357  | 0.976178719  | 0.00000137  |
| 101116929 | PSMB10       | 0.437458005  | 0.206120532 | 0.976067001  | 0.00000139  |
| 101118605 | TUBA8        | 0.496536     | 0.144332203 | 0.975949323  | 0.00000142  |
| 101110884 | CNPY3        | 0.404653905  | 0.246078178 | 0.975934627  | 0.00000143  |
| 100145878 | BLOC1S4      | 0.485254108  | 0.155124107 | 0.975834273  | 0.00000145  |
| 101114915 | ZBTB7B       | 0.419901296  | 0.227005353 | 0.975789153  | 0.00000146  |
| 101112854 | PCBP4        | 0.525803456  | 0.118521534 | 0.975457718  | 0.00000154  |
| 101123013 | RPE          | -0.473749862 | 0.166616586 | -0.713045556 | 0.020620591 |
| 101102074 | SEPTIN9      | 0.563025436  | 0.090149184 | 0.975450865  | 0.00000154  |
| 101121665 | TMEM187      | 0.357468673  | 0.310531505 | 0.975383413  | 0.00000156  |
| 106991188 | -            | 0.424607294  | 0.221293969 | 0.975166485  | 0.00000161  |
| 101121516 | PLEKHJ1      | 0.428527863  | 0.21659913  | 0.975141097  | 0.00000162  |
| 101119064 | NGFR         | 0.370618184  | 0.291754938 | 0.975122071  | 0.00000163  |
| 101108672 | TNFRSF18     | 0.408897321  | 0.240683139 | 0.975000096  | 0.00000166  |
| 100216476 | HTT          | 0.55550617   | 0.095487713 | 0.974905576  | 0.00000168  |
| 101102696 | QPRT         | 0.367166202  | 0.296623877 | 0.974888468  | 0.00000169  |
| 101112506 | TCF25        | 0.48495213   | 0.155419469 | 0.974885612  | 0.00000169  |
| 101116427 | CCDC92       | 0.534713882  | 0.111281773 | 0.974843071  | 0.0000017   |
| 101114205 | RNPEP        | 0.569550585  | 0.085674486 | 0.974815939  | 0.00000171  |
| 101122205 | LOC101122205 | 0.461938438  | 0.178930866 | 0.974806216  | 0.00000171  |
| 105609429 | -            | 0.390608736  | 0.264411186 | 0.974758468  | 0.00000172  |
| 101105648 | CRAT         | 0.451957769  | 0.189744328 | 0.974724292  | 0.00000173  |
| 101120676 | MIEF2        | 0.346477515  | 0.326699951 | 0.97469631   | 0.00000174  |
| 105616536 | FNDC10       | 0.526954714  | 0.117570051 | 0.974692141  | 0.00000174  |
| 101108086 | LOC101108086 | 0.403790965  | 0.247183501 | 0.974649268  | 0.00000175  |
| 101115815 | TCEA2        | 0.450410678  | 0.191453995 | 0.974537529  | 0.00000178  |
| 101107484 | PC           | 0.506867656  | 0.134862369 | 0.974443247  | 0.00000181  |
| 105604611 | -            | 0.477938804  | 0.162374736 | 0.974306977  | 0.00000185  |
| 101106688 | GAK          | 0.437847466  | 0.205670351 | 0.974294289  | 0.00000185  |
| 101119679 | LOC101119679 | 0.41932024   | 0.227716291 | 0.974237321  | 0.00000187  |
| 101119469 | MBD3         | 0.451465671  | 0.190287163 | 0.974129152  | 0.0000019   |
| 101122599 | PEX11G       | 0.384249392  | 0.272951236 | 0.974104919  | 0.00000191  |

|           |              |              |             |             |             |
|-----------|--------------|--------------|-------------|-------------|-------------|
| 101116964 | LOC101116964 | -0.469801197 | 0.170675212 | -0.7294613  | 0.01665256  |
| 101112190 | ABHD11       | 0.346560227  | 0.326576683 | 0.974091077 | 0.00000191  |
| 101113505 | NAPRT        | 0.351424741  | 0.319369378 | 0.974075388 | 0.00000192  |
| 101106672 | ZDHC12       | 0.512637792  | 0.129744383 | 0.974017031 | 0.00000193  |
| 101105718 | POFUT2       | 0.446279297  | 0.196063581 | 0.973821026 | 0.00000199  |
| 101111035 | LOC101111035 | 0.474046201  | 0.166314349 | 0.973784172 | 0.000002    |
| 101103285 | BCL7C        | 0.458296835  | 0.182832997 | 0.973586829 | 0.00000206  |
| 101114955 | GAMT         | 0.492828366  | 0.14782671  | 0.973576997 | 0.00000207  |
| 101113325 | SLC4A2       | 0.472105813  | 0.168299329 | 0.973559501 | 0.00000207  |
| 101106872 | NOSIP        | 0.47143292   | 0.168990975 | 0.973378008 | 0.00000213  |
| 101113408 | USHBP1       | 0.45599092   | 0.18532962  | 0.973352533 | 0.00000214  |
| 101122370 | TBKBP1       | 0.43853685   | 0.204874882 | 0.972835721 | 0.00000231  |
| 101104521 | FBXO31       | 0.499253448  | 0.141803266 | 0.972669637 | 0.00000236  |
| 101104150 | SOD3         | 0.483674071  | 0.156673285 | 0.97256603  | 0.0000024   |
| 101112677 | GUCD1        | 0.557324922  | 0.094178448 | 0.972499771 | 0.00000242  |
| 101114699 | F2RL3        | 0.460193501  | 0.18079443  | 0.972419938 | 0.00000245  |
| 105610127 | LOC105610127 | 0.330353768  | 0.351186488 | 0.972408445 | 0.00000245  |
| 101108289 | WDTC1        | 0.432543685  | 0.211849958 | 0.9723363   | 0.00000248  |
| 101103232 | LOC101103232 | 0.46369211   | 0.177069483 | 0.972332719 | 0.00000248  |
| 101112901 | ARHGAP45     | 0.440458938  | 0.202666438 | 0.972190819 | 0.00000253  |
| 106991165 | -            | 0.395313061  | 0.258189453 | 0.972092938 | 0.00000257  |
| 101114605 | MYO1G        | 0.472559502  | 0.167833952 | 0.972023049 | 0.00000259  |
| 101107513 | LOC101107513 | 0.38011862   | 0.278577934 | 0.971978238 | 0.00000261  |
| 101122855 | LOC101122855 | 0.403847689  | 0.247110759 | 0.971863869 | 0.00000265  |
| 443048    | DCN          | 0.500264732  | 0.140869103 | 0.971811314 | 0.00000267  |
| 101120572 | ELOF1        | 0.444444309  | 0.198131533 | 0.971696578 | 0.00000271  |
| 105612923 | LOC105612923 | 0.432746611  | 0.21161158  | 0.971644329 | 0.00000273  |
| 101115904 | C15H11orf96  | 0.482250829  | 0.158076691 | 0.971509054 | 0.00000279  |
| 101117698 | DGKZ         | 0.39359207   | 0.260456092 | 0.971476814 | 0.0000028   |
| 101122598 | GUK1         | 0.52471962   | 0.119421669 | 0.97147312  | 0.0000028   |
| 101118542 | SLC38A10     | 0.396950119  | 0.256043511 | 0.971402142 | 0.00000283  |
| 101114245 | SYN1         | 0.410732141  | 0.238371113 | 0.971392855 | 0.00000283  |
| 101104538 | SORT1        | 0.466747657  | 0.173853814 | 0.581765706 | 0.077687127 |

|           |              |             |             |             |            |
|-----------|--------------|-------------|-------------|-------------|------------|
| 101121210 | APOM         | 0.46595899  | 0.174680459 | 0.971300654 | 0.00000287 |
| 105605091 | LOC105605091 | 0.504077649 | 0.137380877 | 0.971279031 | 0.00000288 |
| 106992016 | -            | 0.518875503 | 0.124348589 | 0.971212301 | 0.0000029  |
| 101116237 | COMMD5       | 0.341649545 | 0.333936909 | 0.971190137 | 0.00000291 |
| 101120936 | SPEF1        | 0.521387979 | 0.122215248 | 0.971173977 | 0.00000292 |
| 101117260 | OXLD1        | 0.394090574 | 0.25979841  | 0.971086294 | 0.00000295 |
| 101110140 | IFFO1        | 0.440075665 | 0.203105705 | 0.970728324 | 0.0000031  |
| 101113846 | MAP2K2       | 0.427740645 | 0.217537194 | 0.970679548 | 0.00000312 |
| 101111491 | PXN          | 0.409435446 | 0.240003757 | 0.970604879 | 0.00000315 |
| 101104079 | CST3         | 0.404462935 | 0.24632255  | 0.970572062 | 0.00000317 |
| 101116972 | LOC101116972 | 0.355572645 | 0.313290023 | 0.970491948 | 0.0000032  |
| 101107475 | LOC101107475 | 0.473944197 | 0.166418346 | 0.970474232 | 0.00000321 |
| 101106905 | NINJ1        | 0.414846654 | 0.233232095 | 0.970465701 | 0.00000321 |
| 101121395 | LRCH4        | 0.33810491  | 0.339302135 | 0.9704554   | 0.00000322 |
| 101116568 | ABCA7        | 0.340291341 | 0.33598753  | 0.970412407 | 0.00000324 |
| 101114044 | RIPOR1       | 0.541279507 | 0.106129134 | 0.970402719 | 0.00000324 |
| 101105208 | LOC101105208 | 0.381861424 | 0.276196377 | 0.97034801  | 0.00000326 |
| 101119403 | LAMP1        | 0.46942683  | 0.171063033 | 0.970271731 | 0.0000033  |
| 101122460 | AP2S1        | 0.551370499 | 0.09850782  | 0.970202059 | 0.00000333 |
| 101107687 | LOC101107687 | 0.367126998 | 0.296679421 | 0.970166457 | 0.00000334 |
| 101109130 | LYRM4        | 0.514604206 | 0.128028059 | 0.97014925  | 0.00000335 |
| 101120934 | -            | 0.448720104 | 0.193332502 | 0.96998854  | 0.00000342 |
| 100286806 | -            | 0.479982726 | 0.160328793 | 0.969970251 | 0.00000343 |
| 101114706 | GCNT3        | 0.412973124 | 0.235564302 | 0.969760221 | 0.00000353 |
| 101104145 | GADD45GIP1   | 0.375765845 | 0.284574446 | 0.969514345 | 0.00000364 |
| 101121122 | TANGO2       | 0.524623922 | 0.119501352 | 0.969470596 | 0.00000366 |
| 101112312 | STAP2        | 0.465353132 | 0.175317076 | 0.968956023 | 0.00000391 |
| 100145857 | BCKDHA       | 0.407595839 | 0.242330711 | 0.968940426 | 0.00000392 |
| 101122299 | MLYCD        | 0.478052423 | 0.162260595 | 0.968892545 | 0.00000395 |
| 101108823 | NDOR1        | 0.489246465 | 0.151251116 | 0.968785467 | 0.000004   |
| 101107290 | MFSD3        | 0.343849888 | 0.330628526 | 0.968771121 | 0.00000401 |
| 105616427 | SMIM5        | 0.381259574 | 0.277017556 | 0.968715884 | 0.00000404 |
| 101113936 | GSTZ1        | 0.420768056 | 0.225947194 | 0.968655637 | 0.00000407 |

|           |              |             |             |             |            |
|-----------|--------------|-------------|-------------|-------------|------------|
| 101121258 | ZNF358       | 0.423281262 | 0.222894907 | 0.968638756 | 0.00000407 |
| 101114469 | LOC101114469 | 0.428344098 | 0.2168179   | 0.96854786  | 0.00000412 |
| 101102814 | LOC101102814 | 0.383323053 | 0.274207611 | 0.968481254 | 0.00000416 |
| 101123066 | GP6          | 0.482125206 | 0.158200927 | 0.968376767 | 0.00000421 |
| 105612995 | LOC105612995 | 0.467000584 | 0.173589201 | 0.96832217  | 0.00000424 |
| 101108184 | TSR3         | 0.423633124 | 0.222469457 | 0.968282127 | 0.00000426 |
| 101102417 | KPTN         | 0.464478724 | 0.176238302 | 0.968140145 | 0.00000434 |
| 780524    | RPS2         | 0.393924914 | 0.260016866 | 0.967950002 | 0.00000444 |
| 101109632 | PLEKHM2      | 0.434451164 | 0.209615336 | 0.967920438 | 0.00000446 |
| 101113240 | LTB4R        | 0.305732936 | 0.390294875 | 0.967866949 | 0.00000449 |
| 101115547 | GPR31        | 0.470923267 | 0.169515959 | 0.967582495 | 0.00000465 |
| 443445    | THRB         | 0.470923267 | 0.169515959 | 0.967582495 | 0.00000465 |
| 101102094 | CDHR4        | 0.423121243 | 0.223088545 | 0.96740992  | 0.00000474 |
| 101114132 | VAC14        | 0.456564317 | 0.184706936 | 0.967244824 | 0.00000484 |
| 101109108 | FAAP100      | 0.536853991 | 0.109585347 | 0.967177175 | 0.00000488 |
| 101120627 | NPRL3        | 0.465085509 | 0.175598724 | 0.967081609 | 0.00000494 |
| 101115743 | GAB2         | 0.38245969  | 0.275381401 | 0.966973271 | 0.000005   |
| 101111643 | SLC16A3      | 0.29831182  | 0.402478968 | 0.966949306 | 0.00000502 |
| 101107698 | WDR83        | 0.438570935 | 0.204835598 | 0.966736366 | 0.00000515 |
| 101120509 | THAP3        | 0.428703144 | 0.216390577 | 0.966699865 | 0.00000517 |
| 106991439 | -            | 0.399361322 | 0.252900826 | 0.966687112 | 0.00000518 |
| 101105263 | SPHK1        | 0.405698658 | 0.244743678 | 0.966485155 | 0.0000053  |
| 105604105 | MACROD1      | 0.364858282 | 0.29990313  | 0.966477898 | 0.00000531 |
| 101120711 | VPS51        | 0.378720478 | 0.280496526 | 0.96646488  | 0.00000531 |
| 101107721 | FAM110A      | 0.316149041 | 0.37350047  | 0.966233843 | 0.00000546 |
| 101109132 | LOC101109132 | 0.389585493 | 0.26577528  | 0.966186023 | 0.00000549 |
| 101120561 | -            | 0.508127154 | 0.133734806 | 0.966082223 | 0.00000556 |
| 101103463 | -            | 0.39707469  | 0.255880623 | 0.966081406 | 0.00000556 |
| 101117069 | HDHD5        | 0.44319145  | 0.199550717 | 0.965741995 | 0.00000578 |
| 101121484 | RABEP2       | 0.458677593 | 0.182422669 | 0.96572695  | 0.00000579 |
| 101104955 | TSC22D4      | 0.373755424 | 0.287367344 | 0.96565448  | 0.00000584 |
| 101116843 | LOC101116843 | 0.573626095 | 0.08295346  | 0.965238216 | 0.00000613 |
| 101109819 | TMCC2        | 0.394303909 | 0.259517235 | 0.965072994 | 0.00000624 |

|           |              |             |             |             |            |
|-----------|--------------|-------------|-------------|-------------|------------|
| 101109782 | SZRD1        | 0.505889292 | 0.135742269 | 0.965070036 | 0.00000624 |
| 101103799 | PLA2G6       | 0.519568727 | 0.123757683 | 0.965031939 | 0.00000627 |
| 101121737 | ZNF771       | 0.317376053 | 0.371545977 | 0.964973508 | 0.00000631 |
| 101112143 | ADCK5        | 0.654370524 | 0.040084206 | 0.964958342 | 0.00000632 |
| 101115451 | TUBGCP6      | 0.473237556 | 0.167139866 | 0.964813492 | 0.00000643 |
| 101114815 | LIMK2        | 0.383122376 | 0.274480199 | 0.964798171 | 0.00000644 |
| 101105512 | UBALD2       | 0.337144758 | 0.340762975 | 0.964773307 | 0.00000646 |
| 101114408 | LOC101114408 | 0.424140751 | 0.221856483 | 0.964497783 | 0.00000666 |
| 101116942 | INKA1        | 0.31027428  | 0.382928237 | 0.964390565 | 0.00000674 |
| 101106374 | LOC101106374 | 0.525369854 | 0.118881135 | 0.964258517 | 0.00000684 |
| 101114029 | ZC3H3        | 0.502393471 | 0.138915031 | 0.964183571 | 0.00000689 |
| 101111182 | POLR3H       | 0.469374927 | 0.171116843 | 0.96416817  | 0.00000691 |
| 101103186 | SMTN         | 0.449494483 | 0.192470706 | 0.964154875 | 0.00000692 |
| 101108868 | LOC101108868 | 0.393597281 | 0.260449212 | 0.964082727 | 0.00000697 |
| 101118272 | ATG4D        | 0.428764021 | 0.216318172 | 0.963979551 | 0.00000705 |
| 101111530 | UBAC1        | 0.465799507 | 0.174847906 | 0.963659531 | 0.0000073  |
| 105602100 | LOC105602100 | 0.394732085 | 0.258953407 | 0.963571843 | 0.00000737 |
| 494436    | -            | 0.384397254 | 0.272750985 | 0.963523858 | 0.00000741 |
| 105614819 | LOC105614819 | 0.571102117 | 0.084631941 | 0.963409587 | 0.0000075  |
| 101106039 | VGLL4        | 0.464001193 | 0.176742611 | 0.963407567 | 0.0000075  |
| 101102760 | MLXIP        | 0.374332556 | 0.286564083 | 0.963336602 | 0.00000756 |
| 101108216 | ARHGAP8      | 0.521739723 | 0.121918412 | 0.963299143 | 0.00000759 |
| 101118268 | NCLN         | 0.304125855 | 0.392918088 | 0.963292527 | 0.0000076  |
| 443130    | CAPN1        | 0.428639806 | 0.216465925 | 0.96309741  | 0.00000776 |
| 105605712 | -            | 0.441401    | 0.201589094 | 0.962822125 | 0.00000799 |
| 101113646 | NTHL1        | 0.501769559 | 0.139486018 | 0.962699491 | 0.0000081  |
| 101113369 | LOC101113369 | 0.366251905 | 0.297920678 | 0.962597387 | 0.00000818 |
| 101114722 | NUP62        | 0.46078606  | 0.180160305 | 0.962391099 | 0.00000836 |
| 101106991 | LAMTOR4      | 0.378500359 | 0.280799233 | 0.962330452 | 0.00000842 |
| 101105595 | SDHAF1       | 0.503823786 | 0.137611458 | 0.962161393 | 0.00000857 |
| 101119691 | PAGR1        | 0.355183919 | 0.313857159 | 0.962150023 | 0.00000858 |
| 100147798 | CCND3        | 0.380200483 | 0.278465819 | 0.962115753 | 0.00000861 |
| 101107239 | RCE1         | 0.494941495 | 0.145828811 | 0.962053569 | 0.00000866 |



|           |              |             |             |             |            |
|-----------|--------------|-------------|-------------|-------------|------------|
| 101121135 | TNNI2        | 0.318326179 | 0.370036015 | 0.961921742 | 0.00000878 |
| 101122437 | KLF1         | 0.547912591 | 0.101078995 | 0.961811584 | 0.00000889 |
| 101102612 | RAB40C       | 0.496412881 | 0.144447427 | 0.96173926  | 0.00000895 |
| 101119273 | KREMEN2      | 0.532095322 | 0.11337976  | 0.961687626 | 0.000009   |
| 101103631 | -            | 0.426532827 | 0.218980967 | 0.961627756 | 0.00000906 |
| 101119407 | UNK          | 0.535821352 | 0.110401857 | 0.961604193 | 0.00000908 |
| 105613208 | LOC105613208 | 0.435712119 | 0.208145616 | 0.961543671 | 0.00000913 |
| 101111571 | NR1H2        | 0.498367649 | 0.142624618 | 0.961490154 | 0.00000918 |
| 101114252 | PLPP7        | 0.440281332 | 0.202869923 | 0.96122304  | 0.00000944 |
| 100135441 | TALDO1       | 0.319144211 | 0.368738421 | 0.961078755 | 0.00000958 |
| 101109794 | MPV17L2      | 0.447958127 | 0.194182694 | 0.960947195 | 0.00000971 |
| 101109786 | RAPGEF3      | 0.419389281 | 0.227631751 | 0.960696461 | 0.00000996 |
| 101120598 | RPL28        | 0.436327274 | 0.207430782 | 0.960569486 | 0.0000101  |
| 101105898 | ESPL1        | 0.441956974 | 0.200954844 | 0.96054841  | 0.0000101  |
| 101110952 | CBX4         | 0.458135213 | 0.183007335 | 0.960527864 | 0.0000101  |
| 101116821 | IL17RA       | 0.487141595 | 0.153285666 | 0.960261039 | 0.0000104  |
| 101109193 | CRYBA1       | 0.380231044 | 0.27842397  | 0.96016119  | 0.0000105  |
| 101114702 | NDUFS7       | 0.488483246 | 0.151986934 | 0.960136783 | 0.0000105  |
| 101108261 | NDUFAF3      | 0.423962922 | 0.222071107 | 0.959954643 | 0.0000107  |
| 101122982 | TBC1D10A     | 0.489148016 | 0.15134591  | 0.959823115 | 0.0000109  |
| 105603154 | -            | 0.501289613 | 0.139926229 | 0.959796587 | 0.0000109  |
| 101106938 | PLPP2        | 0.581611563 | 0.07778479  | 0.959426308 | 0.0000113  |
| 101120852 | TOR3A        | 0.391311899 | 0.263476029 | 0.959362272 | 0.0000114  |
| 101113608 | VAT1         | 0.524636963 | 0.119490491 | 0.95935347  | 0.0000114  |
| 101121920 | -            | 0.41742488  | 0.23004409  | 0.959307342 | 0.0000114  |
| 100307048 | SPARC        | 0.546905615 | 0.101835654 | 0.959260776 | 0.0000115  |
| 101108793 | UBTD1        | 0.314465474 | 0.376190437 | 0.959060993 | 0.0000117  |
| 101107948 | LOC101107948 | 0.4114301   | 0.237494919 | 0.958956051 | 0.0000118  |
| 101119818 | DOCK6        | 0.54060637  | 0.106650342 | 0.958843961 | 0.0000119  |
| 101111799 | UBXN6        | 0.386587745 | 0.269793766 | 0.958734513 | 0.0000121  |
| 101111395 | NDUFS6       | 0.455056006 | 0.186347543 | 0.958426379 | 0.0000124  |
| 101108484 | NDUFA11      | 0.356380517 | 0.312113089 | 0.958320604 | 0.0000126  |
| 101115027 | DNM2         | 0.324480118 | 0.360330014 | 0.958064782 | 0.0000129  |

|           |              |             |             |             |           |
|-----------|--------------|-------------|-------------|-------------|-----------|
| 101116596 | PPP1R13L     | 0.380225253 | 0.278431901 | 0.958011779 | 0.0000129 |
| 101106839 | KCTD17       | 0.35141483  | 0.319383979 | 0.95781407  | 0.0000132 |
| 105605819 | ADAM8        | 0.353478548 | 0.316351587 | 0.957792004 | 0.0000132 |
| 101108272 | RHBDF1       | 0.406987754 | 0.243102659 | 0.957724469 | 0.0000133 |
| 101114562 | ABHD14A      | 0.386636341 | 0.269728359 | 0.95762228  | 0.0000134 |
| 101106412 | ASL          | 0.497886421 | 0.14307205  | 0.957526054 | 0.0000135 |
| 101114353 | BSG          | 0.453221896 | 0.188354035 | 0.957289754 | 0.0000138 |
| 101103427 | SELENOM      | 0.525749281 | 0.118566425 | 0.957042602 | 0.0000141 |
| 101106041 | LOC101106041 | 0.448840352 | 0.193198532 | 0.957027176 | 0.0000142 |
| 101104764 | NAA38        | 0.368143737 | 0.295240718 | 0.956635447 | 0.0000147 |
| 101113934 | MIDN         | 0.525385403 | 0.118868227 | 0.956454949 | 0.0000149 |
| 101112562 | DDA1         | 0.398727697 | 0.253724589 | 0.95628561  | 0.0000152 |
| 101120195 | YDJC         | 0.630602515 | 0.050616252 | 0.956236278 | 0.0000152 |
| 101102751 | LENG1        | 0.451120651 | 0.190668298 | 0.956199821 | 0.0000153 |
| 101113304 | ANKAR        | 0.554925401 | 0.095908218 | 0.956162708 | 0.0000153 |
| 101118541 | HEXIM2       | 0.430876522 | 0.213814228 | 0.956099084 | 0.0000154 |
| 101104277 | MRPS25       | 0.495889039 | 0.144938308 | 0.956036156 | 0.0000155 |
| 101112123 | MAPRE3       | 0.418110459 | 0.229200542 | 0.956025213 | 0.0000155 |
| 105606262 | LOC105606262 | 0.24888633  | 0.488051137 | 0.955962303 | 0.0000156 |
| 443123    | TSPO         | 0.316067669 | 0.373630265 | 0.955595653 | 0.0000161 |
| 100820742 | GPX1         | 0.313426398 | 0.377855394 | 0.9555406   | 0.0000162 |
| 101120390 | FLNA         | 0.466539622 | 0.174071641 | 0.955286912 | 0.0000166 |
| 101111635 | INSYN1       | 0.435702577 | 0.208156716 | 0.955183308 | 0.0000167 |
| 101122546 | PPP1R12C     | 0.320542226 | 0.36652607  | 0.954912513 | 0.0000171 |
| 101112333 | PHOSPHO1     | 0.381056065 | 0.277295528 | 0.954617649 | 0.0000176 |
| 101107049 | FES          | 0.309942573 | 0.383463993 | 0.954314391 | 0.000018  |
| 101107297 | CENPX        | 0.468934726 | 0.171573621 | 0.954309856 | 0.000018  |
| 101107153 | LOC101107153 | 0.502906413 | 0.138446674 | 0.954199326 | 0.0000182 |
| 105610424 | WDR24        | 0.503030038 | 0.13833394  | 0.954159275 | 0.0000183 |
| 101114606 | CHPF2        | 0.393206616 | 0.260965254 | 0.953952775 | 0.0000186 |
| 101110783 | HSF4         | 0.445706184 | 0.196708097 | 0.953643763 | 0.0000191 |
| 101102700 | TBC1D2       | 0.527986247 | 0.116721581 | 0.953632529 | 0.0000191 |
| 101113184 | TCIRG1       | 0.436981707 | 0.206671864 | 0.953616249 | 0.0000191 |

|           |              |             |             |             |           |
|-----------|--------------|-------------|-------------|-------------|-----------|
| 101103783 | RPL15        | 0.411193355 | 0.237791917 | 0.953607139 | 0.0000192 |
| 100302028 | ZGPAT        | 0.363151904 | 0.302339999 | 0.95357956  | 0.0000192 |
| 105609445 | TGFBR3L      | 0.403957935 | 0.246969417 | 0.953577621 | 0.0000192 |
| 101118712 | LOC101118712 | 0.403957935 | 0.246969417 | 0.953577621 | 0.0000192 |
| 101108328 | ANKEF1       | 0.403957935 | 0.246969417 | 0.953577621 | 0.0000192 |
| 101106883 | LOC101106883 | 0.403957935 | 0.246969417 | 0.953577621 | 0.0000192 |
| 105610928 | LOC105610928 | 0.403957935 | 0.246969417 | 0.953577621 | 0.0000192 |
| 101108299 | ANAPC2       | 0.403957935 | 0.246969417 | 0.953577621 | 0.0000192 |
| 105616534 | -            | 0.403957935 | 0.246969417 | 0.953577621 | 0.0000192 |
| 105609432 | LOC105609432 | 0.403957935 | 0.246969417 | 0.953577621 | 0.0000192 |
| 101101833 | -            | 0.403957935 | 0.246969417 | 0.953577621 | 0.0000192 |
| 101102508 | ERF          | 0.403957935 | 0.246969417 | 0.953577621 | 0.0000192 |
| 101122951 | MFSD10       | 0.403957935 | 0.246969417 | 0.953577621 | 0.0000192 |
| 105615790 | -            | 0.403957935 | 0.246969417 | 0.953577621 | 0.0000192 |
| 100147800 | SLC25A10     | 0.403957935 | 0.246969417 | 0.953577621 | 0.0000192 |
| 101111917 | B3GAT3       | 0.389553049 | 0.265818595 | 0.953358286 | 0.0000196 |
| 101105095 | MYBL2        | 0.415863793 | 0.231971428 | 0.953337776 | 0.0000196 |
| 101123008 | MAPK3        | 0.355951801 | 0.312737367 | 0.953334955 | 0.0000196 |
| 101118784 | TBC1D9B      | 0.275536977 | 0.440976239 | 0.953212466 | 0.0000198 |
| 101104725 | MRPL23       | 0.472753253 | 0.167635444 | 0.95319495  | 0.0000198 |
| 101113157 | MAF1         | 0.398008479 | 0.25466143  | 0.953150942 | 0.0000199 |
| 101120164 | TRMT44       | 0.524818637 | 0.119339258 | 0.952926048 | 0.0000203 |
| 101119851 | KLHL22       | 0.33055769  | 0.350871167 | 0.952814072 | 0.0000205 |
| 101121704 | MZF1         | 0.621481145 | 0.05510263  | 0.952759958 | 0.0000206 |
| 100913171 | ATG9A        | 0.363532303 | 0.301795846 | 0.952736645 | 0.0000206 |
| 101106321 | MYH9         | 0.495761986 | 0.14505752  | 0.952642694 | 0.0000208 |
| 101120386 | LOC101120386 | 0.46839726  | 0.172132311 | 0.952483091 | 0.0000211 |
| 100294595 | SOCS3        | 0.329982116 | 0.351761532 | 0.952443298 | 0.0000211 |
| 101118647 | LOC101118647 | 0.523657674 | 0.120307745 | 0.952431899 | 0.0000211 |
| 101107161 | CARD19       | 0.305972906 | 0.389903906 | 0.952426917 | 0.0000212 |
| 101120369 | TSPAN32      | 0.340134747 | 0.33622437  | 0.952024161 | 0.0000219 |
| 101122490 | THAP4        | 0.468466043 | 0.172060752 | 0.951885311 | 0.0000221 |
| 101103192 | FGD2         | 0.555693684 | 0.095352194 | 0.951869081 | 0.0000221 |

|           |              |             |             |             |           |
|-----------|--------------|-------------|-------------|-------------|-----------|
| 101113841 | TBRG4        | 0.407047607 | 0.243026616 | 0.951865143 | 0.0000222 |
| 101108969 | MAP3K11      | 0.36597609  | 0.298312475 | 0.951786466 | 0.0000223 |
| 554319    | PPIB         | 0.529899354 | 0.115158137 | 0.951770634 | 0.0000223 |
| 101103267 | CAMKK2       | 0.52804776  | 0.116671106 | 0.951749323 | 0.0000224 |
| 101115232 | PIK3IP1      | 0.346630121 | 0.326472536 | 0.95155032  | 0.0000227 |
| 101117866 | GMEB2        | 0.466516543 | 0.174095816 | 0.951328285 | 0.0000231 |
| 101113949 | TIMM17A      | 0.565182014 | 0.088654119 | 0.951063615 | 0.0000236 |
| 101120095 | CISD3        | 0.435084804 | 0.208876044 | 0.951060416 | 0.0000237 |
| 101108482 | FKBP8        | 0.483439631 | 0.156903938 | 0.95074889  | 0.0000243 |
| 101106280 | -            | 0.27101818  | 0.448807724 | 0.950672487 | 0.0000244 |
| 101111266 | LOC101111266 | 0.63901162  | 0.046701662 | 0.950669002 | 0.0000244 |
| 101120406 | PICK1        | 0.53468731  | 0.111302939 | 0.950538521 | 0.0000247 |
| 101101871 | -            | 0.546230534 | 0.102344923 | 0.950514093 | 0.0000247 |
| 101115548 | EXOSC4       | 0.28543631  | 0.424041125 | 0.950329625 | 0.0000251 |
| 101123544 | PDXP         | 0.265086008 | 0.459183267 | 0.950297452 | 0.0000251 |
| 101102766 | SAYSD1       | 0.589393316 | 0.072953056 | 0.950228074 | 0.0000253 |
| 101105738 | PSD4         | 0.406815051 | 0.243322151 | 0.950195287 | 0.0000253 |
| 101109888 | MROH1        | 0.463226162 | 0.177562925 | 0.950124195 | 0.0000255 |
| 101107515 | HDAC7        | 0.474320179 | 0.166035209 | 0.950008024 | 0.0000257 |
| 101123589 | NBEAL2       | 0.38850346  | 0.267221938 | 0.949859473 | 0.000026  |
| 101108831 | LOC101108831 | 0.559086475 | 0.092921321 | 0.949840815 | 0.0000261 |
| 101108956 | CSK          | 0.372867682 | 0.288605276 | 0.949753613 | 0.0000262 |
| 101105700 | BET1L        | 0.413240108 | 0.235231155 | 0.94968163  | 0.0000264 |
| 677670    | BGLAP        | 0.450276928 | 0.191602221 | 0.94966895  | 0.0000264 |
| 101103562 | RAB11B       | 0.566926202 | 0.087456638 | 0.949506526 | 0.0000268 |
| 105615315 | -            | 0.549630771 | 0.099796167 | 0.949273936 | 0.0000272 |
| 101110022 | LOC101110022 | 0.483220845 | 0.157119375 | 0.949271135 | 0.0000272 |
| 101104859 | TBC1D9       | 0.392407117 | 0.262023093 | 0.949217128 | 0.0000274 |
| 101122026 | IZUMO4       | 0.452836868 | 0.188776855 | 0.949167134 | 0.0000275 |
| 105601911 | -            | 0.291490277 | 0.413836585 | 0.949093787 | 0.0000276 |
| 101107345 | RPS19BP1     | 0.285152405 | 0.424522529 | 0.949089157 | 0.0000276 |
| 101106403 | TFE3         | 0.401650196 | 0.2499375   | 0.949061602 | 0.0000277 |
| 101106780 | LRRC14       | 0.415003449 | 0.233037508 | 0.94876201  | 0.0000283 |

|           |              |             |             |             |           |
|-----------|--------------|-------------|-------------|-------------|-----------|
| 101110857 | FLII         | 0.3882882   | 0.26751025  | 0.94865068  | 0.0000286 |
| 101111852 | MAST2        | 0.40399627  | 0.246920279 | 0.948641046 | 0.0000286 |
| 101102716 | PNPLA7       | 0.496895779 | 0.143995814 | 0.948527176 | 0.0000289 |
| 101111336 | SPSB3        | 0.411214229 | 0.237765722 | 0.948448681 | 0.000029  |
| 105609279 | -            | 0.573648794 | 0.082938462 | 0.948388678 | 0.0000292 |
| 101113539 | RPL29        | 0.328727836 | 0.353705743 | 0.948228051 | 0.0000295 |
| 105604794 | LOC105604794 | 0.450096485 | 0.191802303 | 0.947967597 | 0.0000301 |
| 443331    | TIMP1        | 0.405572216 | 0.244904971 | 0.94793613  | 0.0000302 |
| 101120430 | OGFR         | 0.439293981 | 0.204003296 | 0.947903602 | 0.0000303 |
| 100302312 | ARL4C        | 0.52595992  | 0.118391939 | 0.947879565 | 0.0000303 |
| 101117955 | LOC101117955 | 0.361812543 | 0.30426006  | 0.947872463 | 0.0000303 |
| 101121783 | LOC101121783 | 0.449712338 | 0.192228664 | 0.94766626  | 0.0000308 |
| 101112277 | CASTOR2      | 0.56268531  | 0.090386441 | 0.947644466 | 0.0000309 |
| 101105775 | TIMM10       | 0.345450688 | 0.328232274 | 0.947521322 | 0.0000311 |
| 443269    | AGRP         | 0.259182998 | 0.469612857 | 0.947319582 | 0.0000316 |
| 101109965 | LONP1        | 0.507135047 | 0.134622501 | 0.947302812 | 0.0000317 |
| 443133    | IGFBP5       | 0.545674133 | 0.102765871 | 0.947162671 | 0.000032  |
| 101101791 | -            | 0.545674133 | 0.102765871 | 0.947162671 | 0.000032  |
| 101118379 | DMPK         | 0.545674133 | 0.102765871 | 0.947162671 | 0.000032  |
| 443278    | UCP3         | 0.545674133 | 0.102765871 | 0.947162671 | 0.000032  |
| 101103099 | VWA7         | 0.545674133 | 0.102765871 | 0.947162671 | 0.000032  |
| 443033    | SFTPA1       | 0.545674133 | 0.102765871 | 0.947162671 | 0.000032  |
| 101114289 | SYNGR2       | 0.35991048  | 0.306997846 | 0.947111812 | 0.0000321 |
| 101107924 | LMNA         | 0.501670861 | 0.139576476 | 0.947087241 | 0.0000322 |
| 101106225 | CARHSP1      | 0.326325446 | 0.357444663 | 0.947031003 | 0.0000323 |
| 101118800 | NDUFAF8      | 0.390683997 | 0.264311008 | 0.946678074 | 0.0000332 |
| 101123065 | MEGF8        | 0.340195502 | 0.336132471 | 0.946611645 | 0.0000333 |
| 101116402 | REC8         | 0.256923751 | 0.473631936 | 0.946551864 | 0.0000335 |
| 101121935 | LYL1         | 0.374115495 | 0.28686605  | 0.946375937 | 0.0000339 |
| 101111045 | YIF1B        | 0.490710907 | 0.149845311 | 0.946259418 | 0.0000342 |
| 101119168 | LEMD2        | 0.400611331 | 0.251280077 | 0.9462037   | 0.0000343 |
| 101101881 | TST          | 0.493444026 | 0.147242914 | 0.946123347 | 0.0000345 |
| 101122229 | SLC22A23     | 0.5159286   | 0.12688006  | 0.945902986 | 0.0000351 |

|           |              |              |             |              |             |
|-----------|--------------|--------------|-------------|--------------|-------------|
| 101120968 | ZNHIT2       | 0.358871281  | 0.308499117 | 0.945851191  | 0.0000352   |
| 101102753 | GSK3A        | 0.396897666  | 0.256112115 | 0.945821525  | 0.0000353   |
| 101110811 | MRPS34       | 0.383574815  | 0.27386584  | 0.945751855  | 0.0000355   |
| 101121405 | IRAK1        | 0.523621762  | 0.120337781 | 0.945570418  | 0.0000359   |
| 101105734 | -            | 0.417947998  | 0.229400278 | 0.945552608  | 0.000036    |
| 101110240 | GCHFR        | 0.275548095  | 0.440957048 | 0.945524226  | 0.0000361   |
| 101111056 | NT5DC2       | 0.313942337  | 0.377028231 | 0.945455028  | 0.0000362   |
| 101115077 | TMEM223      | 0.332048091  | 0.348570944 | 0.945453462  | 0.0000363   |
| 101115739 | EHMT2        | 0.602425299  | 0.065306707 | 0.945147452  | 0.0000371   |
| 101107982 | SPATA2L      | 0.431539062  | 0.213032368 | 0.945125705  | 0.0000371   |
| 101109129 | LOC101109129 | 0.41326421   | 0.235201094 | 0.944927247  | 0.0000376   |
| 101119072 | NAPA         | 0.517747134  | 0.125314153 | 0.944681965  | 0.0000383   |
| 105607128 | LOC105607128 | 0.465323035  | 0.175348736 | 0.944672775  | 0.0000383   |
| 105609580 | LOC105609580 | 0.461883571  | 0.17898929  | 0.694368542  | 0.025878627 |
| 101117217 | GPAT4        | 0.525807638  | 0.118518068 | 0.944522699  | 0.0000387   |
| 101107487 | RRNAD1       | 0.413253859  | 0.235214004 | 0.944458615  | 0.0000389   |
| 101117734 | NDUFB11      | 0.344016606  | 0.330378544 | 0.944391773  | 0.0000391   |
| 101114848 | ZNF81        | -0.461022187 | 0.179907983 | -0.576075825 | 0.081345004 |
| 101110967 | CAVIN3       | 0.504461993  | 0.137032234 | 0.944283666  | 0.0000394   |
| 101108850 | STMN3        | 0.456126023  | 0.185182792 | 0.944052362  | 0.0000401   |
| 101116753 | ZNF335       | 0.454548875  | 0.186901074 | 0.943991438  | 0.0000402   |
| 100302082 | MAP2K7       | 0.49242991   | 0.148205292 | 0.943591405  | 0.0000414   |
| 101122243 | ATG4B        | 0.416651691  | 0.230997541 | 0.943516744  | 0.0000416   |
| 101111541 | LOC101111541 | 0.269166159  | 0.452035502 | 0.943436032  | 0.0000418   |
| 101102529 | LOC101102529 | 0.337425355  | 0.340335725 | 0.94341605   | 0.0000419   |
| 780477    | CLDN4        | 0.336973211  | 0.341024317 | 0.943386002  | 0.000042    |
| 101116532 | DTX2         | 0.385885632  | 0.27073972  | 0.943341174  | 0.0000421   |
| 101107422 | CD99L2       | 0.49353883   | 0.147153142 | 0.943334266  | 0.0000421   |
| 101111024 | PPP1R14D     | 0.448065244  | 0.194063044 | 0.943281214  | 0.0000423   |
| 101114060 | SEC61A1      | 0.385789135  | 0.270869871 | 0.943252372  | 0.0000424   |
| 101102925 | BICRA        | 0.363913236  | 0.301251452 | 0.943217623  | 0.0000425   |
| 101121742 | ARID5B       | -0.459308476 | 0.181743989 | -0.755125465 | 0.011563498 |
| 101102864 | GNB2         | 0.350087033  | 0.321343002 | 0.943153206  | 0.0000426   |

|           |              |              |             |              |             |
|-----------|--------------|--------------|-------------|--------------|-------------|
| 105607221 | DNLZ         | 0.518849932  | 0.12437042  | 0.943115822  | 0.0000428   |
| 101121721 | ZNF76        | 0.456151441  | 0.185155176 | 0.943077716  | 0.0000429   |
| 101121166 | MAFF         | 0.295378374  | 0.407344639 | 0.943062719  | 0.0000429   |
| 443433    | TPSB2        | 0.458174977  | 0.182964433 | 0.943056798  | 0.0000429   |
| 101115161 | ITPK1        | 0.340000074  | 0.336428125 | 0.943056606  | 0.0000429   |
| 101121534 | MYL9         | 0.423746079  | 0.222332977 | 0.942991264  | 0.0000431   |
| 101105542 | S100A1       | 0.347141724  | 0.325710737 | 0.942990807  | 0.0000431   |
| 101109035 | LOC101109035 | 0.435962333  | 0.207854686 | 0.942595014  | 0.0000443   |
| 101104031 | ROGDI        | 0.409928556  | 0.239382154 | 0.942186167  | 0.0000456   |
| 101120279 | EXOSC7       | 0.439413781  | 0.203865583 | 0.942027136  | 0.0000461   |
| 101120442 | KREMEN1      | 0.458484098  | 0.182631123 | 0.623336099  | 0.054169743 |
| 105610305 | ZNF783       | 0.458484098  | 0.182631123 | 0.623336099  | 0.054169743 |
| 105611242 | LOC105611242 | 0.458484098  | 0.182631123 | 0.623336099  | 0.054169743 |
| 101112860 | CSKMT        | 0.408486491  | 0.241202535 | 0.941987131  | 0.0000462   |
| 101108230 | SLC49A3      | 0.362709083  | 0.302974099 | 0.941904826  | 0.0000464   |
| 101112294 | PRICKLE3     | 0.526934741  | 0.117586517 | 0.941832725  | 0.0000467   |
| 101119803 | PSMG4        | 0.349442846  | 0.322295678 | 0.941804751  | 0.0000468   |
| 101118488 | SSH3         | 0.38342396   | 0.2740706   | 0.941541853  | 0.0000476   |
| 105614324 | -            | 0.388154318  | 0.267689653 | 0.941240059  | 0.0000486   |
| 101106154 | MFSD5        | 0.328430342  | 0.35416767  | 0.941159784  | 0.0000488   |
| 101107364 | MTDH         | -0.457815943 | 0.183352013 | -0.708500787 | 0.021824981 |
| 101111954 | C3H12orf73   | 0.632094093  | 0.049906538 | 0.941139709  | 0.0000489   |
| 101117230 | LRRC8A       | 0.423803139  | 0.222264051 | 0.941118892  | 0.000049    |
| 101109235 | TMEM53       | 0.429445447  | 0.215508652 | 0.941022912  | 0.0000493   |
| 101109581 | MRPL28       | 0.444255872  | 0.19834461  | 0.941003295  | 0.0000493   |
| 101102252 | NAGLU        | 0.473382863  | 0.166991346 | 0.940965827  | 0.0000495   |
| 101114059 | ASB2         | 0.396126996  | 0.257121266 | 0.940946535  | 0.0000495   |
| 105608253 | LETM1        | 0.519153803  | 0.124111155 | 0.940905547  | 0.0000497   |
| 101122801 | TNFSF12      | 0.425657398  | 0.220030834 | 0.940793891  | 0.00005     |
| 101106587 | SLC25A42     | 0.349523172  | 0.322176805 | 0.940724656  | 0.0000503   |
| 106991663 | -            | 0.290907173  | 0.414814378 | 0.940531197  | 0.0000509   |
| 101106286 | UNC45A       | 0.466440585  | 0.174175396 | 0.940457801  | 0.0000512   |
| 101107370 | TEN1         | 0.422064673  | 0.224369503 | 0.94044669   | 0.0000512   |

|           |              |              |             |              |             |
|-----------|--------------|--------------|-------------|--------------|-------------|
| 101111544 | REEP2        | 0.347310423  | 0.325459738 | 0.940409424  | 0.0000513   |
| 101110684 | OPLAH        | 0.283761197  | 0.426885216 | 0.940401066  | 0.0000513   |
| 105604575 | -            | 0.455098313  | 0.186301408 | 0.685653875  | 0.028619867 |
| 101120718 | CD2BP2       | 0.234854218  | 0.513667255 | 0.940307488  | 0.0000517   |
| 101106452 | LOC101106452 | 0.262535113  | 0.463677491 | 0.940274429  | 0.0000518   |
| 101121449 | UBE2M        | 0.291336585  | 0.414094202 | 0.940240691  | 0.0000519   |
| 101104191 | SIGIRR       | 0.484085212  | 0.156269279 | 0.940167707  | 0.0000521   |
| 101108441 | BNIP3        | 0.66130748   | 0.037314368 | 0.940089992  | 0.0000524   |
| 101108500 | CAMTA2       | 0.445302893  | 0.197162372 | 0.939982927  | 0.0000528   |
| 101119652 | GRTP1        | 0.41124714   | 0.237724425 | 0.939952068  | 0.0000529   |
| 101123165 | BOLA1        | 0.556337044  | 0.094888163 | 0.939922059  | 0.000053    |
| 101108401 | FLOT2        | 0.290383117  | 0.415694082 | 0.939735122  | 0.0000536   |
| 101104826 | MYO1F        | 0.355227266  | 0.313793891 | 0.939711964  | 0.0000537   |
| 101115893 | PREX1        | 0.221889193  | 0.537817428 | 0.939686273  | 0.0000538   |
| 101120596 | SBSN         | 0.566115123  | 0.08801219  | 0.939538374  | 0.0000543   |
| 101109666 | SNN          | 0.325577503  | 0.358612745 | 0.939529024  | 0.0000544   |
| 101117780 | SLC35C2      | 0.452128251  | 0.18955648  | 0.939394952  | 0.0000548   |
| 101119385 | WASHC1       | 0.417948865  | 0.229399212 | 0.939311153  | 0.0000551   |
| 101122271 | LRRC61       | 0.54830933   | 0.100781859 | 0.939122172  | 0.0000558   |
| 101103925 | SFI1         | 0.382395633  | 0.275468599 | 0.939088028  | 0.0000559   |
| 105615257 | LOC105615257 | 0.477784095  | 0.162530234 | 0.938906219  | 0.0000566   |
| 101122350 | WDR91        | 0.543231989  | 0.10462643  | 0.938830432  | 0.0000569   |
| 101120162 | C5H19orf57   | 0.4363536    | 0.207400221 | 0.938766457  | 0.0000571   |
| 101115754 | HSPB1        | 0.298953819  | 0.401417815 | 0.938236966  | 0.0000591   |
| 101123368 | LOC101123368 | 0.530326124  | 0.114811166 | 0.938181749  | 0.0000593   |
| 101102126 | C1QA         | 0.464616448  | 0.176093013 | 0.938149414  | 0.0000594   |
| 101101972 | NOL12        | 0.462167742  | 0.178686823 | 0.938114515  | 0.0000595   |
| 101103607 | SIKE1        | -0.451719871 | 0.19000664  | -0.782584973 | 0.00744891  |
| 101120780 | DHX37        | 0.473964363  | 0.166397783 | 0.938051014  | 0.0000598   |
| 101103287 | ANKS3        | 0.476342944  | 0.163983021 | 0.93801044   | 0.0000599   |
| 101123244 | LOC101123244 | 0.451451424  | 0.190302892 | 0.590922571  | 0.072027082 |
| 106991551 | C14H16orf74  | 0.509970351  | 0.132095179 | 0.937971282  | 0.0000601   |
| 101111026 | LOC101111026 | 0.191525334  | 0.596071373 | 0.937908972  | 0.0000603   |



|           |              |              |             |              |             |
|-----------|--------------|--------------|-------------|--------------|-------------|
| 101102725 | C5H19orf53   | 0.312007732  | 0.380134414 | 0.93776547   | 0.0000609   |
| 101120284 | ADAMTS15     | 0.538226519  | 0.108505975 | 0.937585634  | 0.0000615   |
| 101108634 | MICOS10      | 0.427589998  | 0.217716972 | 0.937576639  | 0.0000616   |
| 101122584 | SBF1         | 0.595687382  | 0.069191113 | 0.937573258  | 0.0000616   |
| 100913152 | HSPA1A       | 0.353900215  | 0.315733857 | 0.937541908  | 0.0000617   |
| 101110561 | ARHGEF11     | 0.561615903  | 0.091135015 | 0.937536574  | 0.0000617   |
| 101108782 | DALRD3       | 0.541348701  | 0.106075648 | 0.93748708   | 0.0000619   |
| 101121898 | AP2A2        | 0.352217366  | 0.318202951 | 0.937468113  | 0.000062    |
| 101102990 | LOC101102990 | 0.417507437  | 0.229942417 | 0.937299381  | 0.0000627   |
| 101121994 | DTYMK        | 0.242978584  | 0.498768333 | 0.937290364  | 0.0000627   |
| 101113519 | TPPP3        | 0.422912621  | 0.223341142 | 0.937225958  | 0.000063    |
| 101103845 | CINP         | 0.449831259  | 0.192096615 | 0.690721895  | 0.02700275  |
| 101115302 | PPP2R1A      | 0.459300259  | 0.181752819 | 0.937202293  | 0.000063    |
| 101103370 | SMURF1       | 0.449720704  | 0.192219373 | 0.670847061  | 0.033720686 |
| 106990907 | -            | 0.580881097  | 0.078248688 | 0.937182143  | 0.0000631   |
| 101123204 | MGAT3        | 0.55138782   | 0.098495047 | 0.937144976  | 0.0000633   |
| 101122540 | DDRGK1       | 0.41251794   | 0.236132901 | 0.937039214  | 0.0000637   |
| 105608233 | LOC105608233 | 0.34670821   | 0.326356198 | 0.936873231  | 0.0000643   |
| 105603814 | LOC105603814 | 0.34670821   | 0.326356198 | 0.936873231  | 0.0000643   |
| 101114224 | MRPL11       | 0.33609436   | 0.342364795 | 0.936866166  | 0.0000644   |
| 101110306 | CTDSP1       | 0.264586968  | 0.46006095  | 0.936419313  | 0.0000662   |
| 101113342 | SLC46A3      | -0.448446167 | 0.193637901 | -0.667822267 | 0.034833555 |
| 101102467 | TARBP2       | 0.433837548  | 0.210332701 | 0.936308942  | 0.0000666   |
| 101115049 | TMC6         | 0.312892521  | 0.378712253 | 0.936241415  | 0.0000669   |
| 101116070 | VMO1         | 0.447433853  | 0.194768931 | 0.936076852  | 0.0000676   |
| 101121173 | LRPAP1       | 0.336284626  | 0.342074361 | 0.936016206  | 0.0000678   |
| 101102584 | USF2         | 0.485912507  | 0.154481311 | 0.935944443  | 0.0000681   |
| 101110774 | GGNBP2       | -0.447621843 | 0.194558604 | -0.903579147 | 0.000336128 |
| 101108998 | LOC101108998 | 0.301564406  | 0.397116639 | 0.935786501  | 0.0000688   |
| 101110813 | CARD11       | 0.465363133  | 0.175306556 | 0.935774446  | 0.0000689   |
| 101108390 | LOC101108390 | 0.491288938  | 0.149292615 | 0.935680574  | 0.0000693   |
| 101109216 | FAH          | 0.50943607   | 0.13256917  | 0.935571234  | 0.0000697   |
| 101104767 | OGFOD3       | 0.379391772  | 0.279574457 | 0.935533665  | 0.0000699   |

|           |              |              |             |              |             |
|-----------|--------------|--------------|-------------|--------------|-------------|
| 101102082 | B9D2         | 0.241984621  | 0.500581207 | 0.935516739  | 0.0000699   |
| 101112577 | FAM92A       | -0.446114233 | 0.196249084 | -0.735385443 | 0.015361608 |
| 101105444 | -            | 0.636349529  | 0.047918228 | 0.935489926  | 0.0000701   |
| 101112566 | RPL18A       | 0.432730389  | 0.211630631 | 0.935467273  | 0.0000702   |
| 101115149 | SAMD4B       | 0.323002085  | 0.362649439 | 0.935377396  | 0.0000705   |
| 101117299 | LOC101117299 | 0.445561968  | 0.196870474 | 0.682564684  | 0.029637331 |
| 100415775 | ID3          | 0.556962169  | 0.094438663 | 0.935375334  | 0.0000705   |
| 101104587 | RHBDF2       | 0.268118038  | 0.453866831 | 0.935201184  | 0.0000713   |
| 101119816 | SGTA         | 0.390884439  | 0.264044304 | 0.935042823  | 0.000072    |
| 101108562 | TPRN         | 0.469072558  | 0.171430521 | 0.934617695  | 0.0000738   |
| 105602361 | LOC105602361 | 0.395486141  | 0.257962102 | 0.93432433   | 0.0000752   |
| 101110295 | FOXK1        | 0.341051657  | 0.334838808 | 0.934106816  | 0.0000761   |
| 101103020 | KCNK5        | 0.36592892   | 0.298379508 | 0.934008557  | 0.0000766   |
| 101117430 | SP2          | -0.444037141 | 0.198592109 | -0.627651986 | 0.05203986  |
| 101108334 | TSKS         | 0.292023221  | 0.412943856 | 0.933677815  | 0.0000781   |
| 101111302 | JPT1         | 0.613291847  | 0.059348183 | 0.933572295  | 0.0000786   |
| 101114736 | MRPL21       | 0.332374221  | 0.34806863  | 0.933344424  | 0.0000796   |
| 101106640 | NLRP6        | 0.308670991  | 0.385521172 | 0.933300507  | 0.0000799   |
| 101121127 | CCDC86       | 0.323488134  | 0.361885879 | 0.933280293  | 0.0000799   |
| 101107446 | MAEA         | 0.47972921   | 0.160581712 | 0.933248208  | 0.0000801   |
| 101107535 | KIF1C        | 0.33718919   | 0.340695304 | 0.933247887  | 0.0000801   |
| 101119926 | FFAR2        | 0.442216785  | 0.200658852 | 0.68687925   | 0.028222969 |
| 100145870 | SLC66A2      | 0.422851461  | 0.223415225 | 0.93323727   | 0.0000801   |
| 101119246 | NUMA1        | 0.424628396  | 0.221268545 | 0.93322399   | 0.0000802   |
| 101111097 | MED16        | 0.43880714   | 0.204563485 | 0.933200127  | 0.0000803   |
| 101114732 | AARS2        | 0.452974748  | 0.188625377 | 0.933080931  | 0.0000809   |
| 101106029 | ZNF575       | 0.37567926   | 0.284694428 | 0.93290003   | 0.0000817   |
| 101120515 | ITPKC        | -0.441124189 | 0.201905309 | -0.47619121  | 0.164136431 |
| 101114573 | HOGA1        | 0.37567926   | 0.284694428 | 0.93290003   | 0.0000817   |
| 101110218 | PLEK         | -0.441013606 | 0.202031715 | -0.418128161 | 0.229178784 |
| 101117514 | PYCR3        | 0.311250681  | 0.381353329 | 0.932862239  | 0.0000819   |
| 101122656 | AXIN1        | 0.42587164   | 0.219773638 | 0.932760778  | 0.0000824   |
| 101107752 | POLR3K       | 0.370333468  | 0.292154892 | 0.932512825  | 0.0000836   |

|           |              |             |             |             |             |
|-----------|--------------|-------------|-------------|-------------|-------------|
| 101118854 | AKNA         | 0.459474595 | 0.181565533 | 0.932459344 | 0.0000839   |
| 101110113 | CLIP2        | 0.420105123 | 0.226756264 | 0.932347704 | 0.0000844   |
| 101102662 | NPEPL1       | 0.470074104 | 0.170392828 | 0.932269463 | 0.0000848   |
| 101120611 | POMGNT2      | 0.500789047 | 0.140386257 | 0.932225895 | 0.000085    |
| 101114351 | AP1M2        | 0.303209023 | 0.394418423 | 0.932162957 | 0.0000853   |
| 443351    | CENPB        | 0.223715034 | 0.534389166 | 0.932115641 | 0.0000856   |
| 101109701 | LOC101109701 | 0.359923903 | 0.306978479 | 0.931730562 | 0.0000875   |
| 100135695 | PSAP         | 0.409415636 | 0.240028749 | 0.931688419 | 0.0000877   |
| 101103257 | NDUFA3       | 0.487084862 | 0.153340731 | 0.931341144 | 0.0000894   |
| 101112660 | RAI1         | 0.546701466 | 0.101989491 | 0.931133712 | 0.0000905   |
| 101112687 | ALDH3B1      | 0.293790317 | 0.409990339 | 0.931129125 | 0.0000905   |
| 101107279 | DOK3         | 0.272885533 | 0.445563832 | 0.930976394 | 0.0000913   |
| 101108778 | LOC101108778 | 0.416342036 | 0.231380015 | 0.930972235 | 0.0000913   |
| 101112840 | SNX21        | 0.420209649 | 0.226628587 | 0.930893803 | 0.0000917   |
| 105610921 | PADI4        | 0.29021913  | 0.415969537 | 0.93081381  | 0.0000922   |
| 443046    | ATP7B        | 0.468787273 | 0.171726789 | 0.930589328 | 0.0000933   |
| 101105916 | IDUA         | 0.395978568 | 0.257315877 | 0.930512065 | 0.0000937   |
| 101103319 | JMJD4        | 0.326262115 | 0.357543495 | 0.930246809 | 0.0000952   |
| 101111103 | ISM2         | 0.295728935 | 0.406761704 | 0.930092185 | 0.000096    |
| 105604861 | -            | 0.295728935 | 0.406761704 | 0.930092185 | 0.000096    |
| 101111100 | CXCL13       | 0.437935737 | 0.205568397 | 0.317734706 | 0.370975639 |
| 101103471 | IER2         | 0.28902212  | 0.41798281  | 0.930026897 | 0.0000963   |
| 105610709 | LOC105610709 | 0.381310787 | 0.276947628 | 0.929921713 | 0.0000969   |
| 101120848 | SPEM1        | 0.4378224   | 0.205699307 | 0.520672446 | 0.122820471 |
| 101104353 | NFKBIL1      | 0.629652932 | 0.051071557 | 0.929527118 | 0.0000991   |
| 101114192 | FAM174C      | 0.294787867 | 0.408327472 | 0.929512429 | 0.0000991   |
| 101107019 | GRK6         | 0.40787989  | 0.241970588 | 0.929494215 | 0.0000992   |
| 105610931 | -            | 0.337637187 | 0.34001336  | 0.929116905 | 0.000101326 |
| 100036760 | RPL13A       | 0.407868078 | 0.241985557 | 0.928999398 | 0.000101985 |
| 101102937 | PPP1R13B     | 0.427493278 | 0.217832441 | 0.928909354 | 0.000102492 |
| 101106776 | LOC101106776 | -0.43676334 | 0.206924915 | -0.76167109 | 0.010465506 |
| 101108954 | PEBP1        | 0.543677032 | 0.1042858   | 0.928702847 | 0.000103661 |
| 101105150 | BLOC1S1      | 0.364964961 | 0.299751131 | 0.928702715 | 0.000103662 |

|           |              |              |             |              |             |
|-----------|--------------|--------------|-------------|--------------|-------------|
| 101102156 | LOC101102156 | 0.258646623  | 0.470565674 | 0.928623624  | 0.000104113 |
| 101105076 | ADAMTS10     | 0.54878974   | 0.100422801 | 0.928548541  | 0.000104542 |
| 105602913 | LOC105602913 | 0.436260163  | 0.207508698 | 0.538367197  | 0.108395724 |
| 101113713 | FMO5         | -0.43615946  | 0.207625648 | -0.49737645  | 0.14354714  |
| 106991831 | LOC106991831 | 0.478420379  | 0.16189128  | 0.92853618   | 0.000104613 |
| 101105195 | ZMYND12      | 0.435899672  | 0.207927522 | 0.604562661  | 0.064105056 |
| 101118905 | SLC25A29     | 0.459861593  | 0.181150196 | 0.928534186  | 0.000104624 |
| 443104    | -            | 0.358766154  | 0.308651203 | 0.92852999   | 0.000104648 |
| 101111605 | BCAP31       | 0.320292499  | 0.366920777 | 0.928423974  | 0.000105257 |
| 101106244 | TP53I3       | 0.435667552  | 0.20819746  | 0.654374831  | 0.040082445 |
| 100126570 | ASZ1         | 0.509901202  | 0.132156466 | 0.928228952  | 0.000106383 |
| 101118138 | EVL          | 0.609896659  | 0.061169723 | 0.928211799  | 0.000106482 |
| 101117378 | CSTF2T       | 0.353770841  | 0.315923319 | 0.928124185  | 0.000106992 |
| 101101924 | UBE2Q2       | -0.435294102 | 0.208632179 | -0.790850094 | 0.006448132 |
| 106991980 | LOC106991980 | 0.44390508   | 0.198741625 | 0.92800306   | 0.000107699 |
| 101110393 | AZIN2        | 0.575220228  | 0.08190447  | 0.927858216  | 0.000108548 |
| 101113227 | SURF2        | 0.440031     | 0.203156931 | 0.927789986  | 0.00010895  |
| 105602976 | LOC105602976 | 0.369697811  | 0.293048891 | 0.927759762  | 0.000109129 |
| 106991403 | -            | 0.434657578  | 0.209374339 | 0.591743106  | 0.071533411 |
| 101118845 | CHST12       | 0.365802867  | 0.298558678 | 0.927714529  | 0.000109396 |
| 101106548 | HDDC3        | 0.417434085  | 0.230032751 | 0.927594126  | 0.000110111 |
| 100187549 | HPCAL1       | 0.52316529   | 0.120719971 | 0.927503299  | 0.000110652 |
| 105602949 | LOC105602949 | 0.523653536  | 0.120311206 | 0.927458606  | 0.000110919 |
| 101111567 | AGTRAP       | 0.247030537  | 0.491406993 | 0.927430455  | 0.000111087 |
| 101122492 | ZNF768       | 0.4542674    | 0.187208719 | 0.927391712  | 0.000111319 |
| 101115137 | HOXB7        | -0.433263069 | 0.211005593 | -0.666584706 | 0.035295955 |
| 101108327 | SAMD11       | 0.393934925  | 0.260003661 | 0.927202565  | 0.000112458 |
| 100147781 | SLC39A3      | 0.295105146  | 0.407799258 | 0.927113736  | 0.000112995 |
| 106990325 | LOC106990325 | 0.542685925  | 0.10504534  | 0.92699568   | 0.000113713 |
| 101120041 | CUX1         | 0.49393783   | 0.146775683 | 0.926894624  | 0.000114329 |
| 101118855 | UBL4A        | 0.292435319  | 0.412254181 | 0.926817565  | 0.000114801 |
| 101109247 | EMD          | 0.458949507  | 0.182129971 | 0.926750527  | 0.000115213 |
| 101120043 | LOC101120043 | 0.54637277   | 0.102237489 | 0.926686223  | 0.000115609 |

|           |              |              |             |              |             |
|-----------|--------------|--------------|-------------|--------------|-------------|
| 101116615 | ESRRA        | 0.293368941  | 0.410693713 | 0.92657666   | 0.000116286 |
| 101110689 | TBC1D16      | 0.315213354  | 0.374994317 | 0.926446112  | 0.000117096 |
| 101102013 | ORAI1        | 0.455857026  | 0.185475201 | 0.926339959  | 0.000117758 |
| 101117651 | STPG1        | 0.643686564  | 0.044615489 | 0.926293477  | 0.000118049 |
| 100302637 | NR6A1        | 0.483823125  | 0.156526745 | 0.926086385  | 0.000119351 |
| 101111455 | ATP5ME       | 0.401304988  | 0.250383186 | 0.926021323  | 0.000119762 |
| 101102042 | LOC101102042 | 0.349265461  | 0.322558267 | 0.925961866  | 0.000120139 |
| 101114550 | TRAPPC6A     | 0.483770767  | 0.156578211 | 0.925900596  | 0.000120528 |
| 101113302 | FAM25A       | 0.627600662  | 0.052064856 | 0.925844133  | 0.000120887 |
| 101107545 | RRAS         | 0.408823024  | 0.240777024 | 0.925792232  | 0.000121218 |
| 101104511 | DPH1         | 0.491111187  | 0.149462444 | 0.92547582   | 0.000123251 |
| 101106414 | RARG         | 0.267100655  | 0.455647641 | 0.92526884   | 0.000124594 |
| 101122545 | LOC101122545 | 0.440296204  | 0.202852879 | 0.92511977   | 0.000125568 |
| 101102524 | PAQR6        | 0.419150381  | 0.227924357 | 0.925032604  | 0.00012614  |
| 101117276 | MADD         | 0.459601854  | 0.181428893 | 0.924654916  | 0.000128641 |
| 101104259 | DVL1         | 0.465422209  | 0.175244422 | 0.924329069  | 0.000130828 |
| 101106768 | FBXW9        | 0.465422209  | 0.175244422 | 0.924329069  | 0.000130828 |
| 101102089 | ADCY2        | 0.465422209  | 0.175244422 | 0.924329069  | 0.000130828 |
| 101117268 | NECAB3       | 0.250626234  | 0.484913837 | 0.924188172  | 0.000131783 |
| 101112553 | ACRBP        | 0.494759379  | 0.146000344 | 0.924183391  | 0.000131815 |
| 101111981 | SPNS3        | 0.238548999  | 0.506868751 | 0.923929125  | 0.00013355  |
| 101122645 | LOC101122645 | 0.36182969   | 0.304235438 | 0.923785645  | 0.000134537 |
| 101112813 | FDX2         | 0.525131359  | 0.119079216 | 0.92369466   | 0.000135165 |
| 101118996 | MAPKAPK3     | 0.307471745  | 0.387466238 | 0.923583135  | 0.000135939 |
| 101102302 | NECAP1       | -0.428759622 | 0.216323405 | -0.745424309 | 0.013335948 |
| 101101816 | -            | 0.268546169  | 0.453118377 | 0.923548859  | 0.000136177 |
| 101104265 | ARHGEF1      | 0.374691075  | 0.2860657   | 0.923536325  | 0.000136264 |
| 101103661 | TMEM9        | 0.564061919  | 0.089428636 | 0.923460955  | 0.000136789 |
| 101121366 | SCAND1       | 0.504501122  | 0.13699677  | 0.923302939  | 0.000137896 |
| 101118814 | PCSK7        | 0.399704944  | 0.252454713 | 0.923144088  | 0.000139014 |
| 101119235 | TPRG1L       | 0.306527308  | 0.389001378 | 0.92313344   | 0.00013909  |
| 101109052 | TBC1D10C     | 0.473376295  | 0.166998058 | 0.923041483  | 0.00013974  |
| 101118990 | LOC101118990 | 0.354390388  | 0.315016563 | 0.922953897  | 0.000140363 |

|           |              |             |             |             |             |
|-----------|--------------|-------------|-------------|-------------|-------------|
| 101117564 | -            | 0.428126032 | 0.217077669 | 0.584385626 | 0.076039291 |
| 101111644 | GID4         | 0.427771356 | 0.217500555 | 0.662636979 | 0.036798706 |
| 101107351 | FCHSD1       | 0.359850054 | 0.307085035 | 0.922934812 | 0.000140498 |
| 105602053 | LOC105602053 | 0.4050451   | 0.245578016 | 0.922882955 | 0.000140868 |
| 101122200 | TNFRSF13B    | 0.400615975 | 0.251274066 | 0.922851136 | 0.000141095 |
| 101104415 | UBE2T        | 0.584709517 | 0.075837162 | 0.922601144 | 0.000142889 |
| 105610092 | LOC105610092 | 0.264676246 | 0.459903878 | 0.922516331 | 0.000143501 |
| 101115917 | ACTN3        | 0.453359098 | 0.1882035   | 0.92249489  | 0.000143656 |
| 101112670 | BCL2L12      | 0.399671105 | 0.252498625 | 0.922366743 | 0.000144586 |
| 101109560 | LIN7B        | 0.278896012 | 0.435195544 | 0.922225853 | 0.000145613 |
| 101104386 | GALNT14      | 0.513877687 | 0.128660534 | 0.92215673  | 0.000146119 |
| 100302083 | CDKN1A       | 0.31606426  | 0.373635704 | 0.92206019  | 0.000146827 |
| 101115537 | PIP5K1C      | 0.389728055 | 0.265584999 | 0.92202215  | 0.000147107 |
| 101110170 | CEACAM20     | 0.37581163  | 0.284511012 | 0.921931515 | 0.000147776 |
| 101115252 | LOC101115252 | 0.262204865 | 0.464260753 | 0.921637691 | 0.000149959 |
| 101105086 | GSDMB        | 0.365962973 | 0.298331115 | 0.921541421 | 0.000150679 |
| 101119130 | LOC101119130 | 0.320204145 | 0.367060476 | 0.921351328 | 0.000152109 |
| 101103911 | ADIPOR1      | 0.442411318 | 0.200437395 | 0.921234034 | 0.000152996 |
| 101112923 | PDF          | 0.399520232 | 0.252694465 | 0.921218099 | 0.000153117 |
| 101120112 | ESS2         | 0.379601723 | 0.279286412 | 0.921197117 | 0.000153276 |
| 443504    | EEF1D        | 0.433723586 | 0.210466087 | 0.921192216 | 0.000153313 |
| 101106095 | STUM         | 0.436261925 | 0.207506652 | 0.921122479 | 0.000153843 |
| 105606095 | -            | 0.304535047 | 0.392249363 | 0.920919862 | 0.000155391 |
| 101113149 | GPX4         | 0.220891431 | 0.539694574 | 0.920854675 | 0.000155892 |
| 101105128 | ADAM15       | 0.240635227 | 0.503046794 | 0.920826457 | 0.000156109 |
| 101107909 | SMIM12       | 0.468979063 | 0.171527582 | 0.920388285 | 0.000159507 |
| 101110250 | ZNHIT3       | 0.457837477 | 0.183328754 | 0.920135074 | 0.000161496 |
| 101115985 | MYH14        | 0.328128999 | 0.354635883 | 0.920022186 | 0.000162388 |
| 101119527 | PAQR4        | 0.272011449 | 0.447080928 | 0.919688302 | 0.000165048 |
| 101102671 | LOC101102671 | 0.314064707 | 0.376832176 | 0.919655507 | 0.000165312 |
| 101114909 | LOC101114909 | 0.327462296 | 0.355672881 | 0.919544709 | 0.000166203 |
| 101104680 | LRFN3        | 0.360697569 | 0.305863356 | 0.919543597 | 0.000166211 |
| 101119242 | AKT2         | 0.376364614 | 0.28374547  | 0.919514153 | 0.000166449 |

|           |              |             |             |             |             |
|-----------|--------------|-------------|-------------|-------------|-------------|
| 101117837 | BID          | 0.338218882 | 0.339128942 | 0.919422698 | 0.000167188 |
| 443151    | EP4C         | 0.361574695 | 0.304601704 | 0.919265543 | 0.000168463 |
| 101104340 | RELT         | 0.231702974 | 0.519495336 | 0.918987117 | 0.00017074  |
| 101121963 | STRN4        | 0.395070507 | 0.258508249 | 0.918849789 | 0.000171872 |
| 101110513 | C7H15orf62   | 0.443393873 | 0.199321021 | 0.918345864 | 0.000176071 |
| 101110439 | C14H19orf33  | 0.313835071 | 0.377200127 | 0.918190854 | 0.000177378 |
| 101106256 | BORCS8       | 0.279380239 | 0.43436511  | 0.917980395 | 0.000179164 |
| 101105073 | FARSA        | 0.327921869 | 0.354957892 | 0.917949801 | 0.000179424 |
| 101103166 | NAT9         | 0.394650332 | 0.259061008 | 0.917939418 | 0.000179513 |
| 101116668 | TNFRSF25     | 0.416890377 | 0.230702969 | 0.917919709 | 0.000179681 |
| 101108595 | AP2A1        | 0.364448791 | 0.300486968 | 0.917809986 | 0.000180619 |
| 101115319 | KLF15        | 0.394159698 | 0.259707286 | 0.91777182  | 0.000180946 |
| 101117799 | LOC101117799 | 0.54878272  | 0.100428041 | 0.917610974 | 0.00018233  |
| 101119329 | SELENOW      | 0.22086498  | 0.539744372 | 0.917561758 | 0.000182755 |
| 101108532 | PGAM1        | 0.239397954 | 0.505312003 | 0.91743308  | 0.000183869 |
| 101112180 | LZTS2        | 0.356213733 | 0.312355875 | 0.917320521 | 0.000184848 |
| 105614838 | LOC105614838 | 0.42281929  | 0.223454199 | 0.612744214 | 0.059639541 |
| 101112442 | DGKD         | 0.247657254 | 0.490272588 | 0.917138077 | 0.000186443 |
| 105615848 | LOC105615848 | 0.422501112 | 0.223839869 | 0.597405991 | 0.06818638  |
| 101116814 | PHYHD1       | 0.406697228 | 0.24347196  | 0.916913374 | 0.000188421 |
| 101113536 | TMED3        | 0.396810337 | 0.256226358 | 0.916825913 | 0.000189195 |
| 101104618 | RNH1         | 0.427214785 | 0.218165113 | 0.916719676 | 0.000190139 |
| 101113669 | ANKRD39      | 0.629582188 | 0.051105585 | 0.916606304 | 0.00019115  |
| 101103609 | NPM3         | 0.421373402 | 0.225209841 | 0.618808874 | 0.056465158 |
| 101120127 | FAM131A      | 0.500618191 | 0.140543488 | 0.916569311 | 0.00019148  |
| 101102145 | RPS14        | 0.343541864 | 0.331090642 | 0.916276456 | 0.000194113 |
| 101104086 | KMT2B        | 0.400991979 | 0.250787682 | 0.916144865 | 0.000195304 |
| 101102320 | SEC14L1      | 0.313521742 | 0.377702469 | 0.916078918 | 0.000195903 |
| 101113275 | LOC101113275 | 0.373753716 | 0.287369723 | 0.916020154 | 0.000196438 |
| 101121436 | DRC3         | 0.373753716 | 0.287369723 | 0.916020154 | 0.000196438 |
| 101102006 | PAFAH1B3     | 0.326521462 | 0.357138857 | 0.915995871 | 0.000196659 |
| 100192428 | DBP          | 0.362146916 | 0.303780112 | 0.915875342 | 0.000197761 |
| 101106772 | SRD5A3       | 0.419895252 | 0.227012742 | 0.606717405 | 0.062908404 |

|           |              |             |             |             |             |
|-----------|--------------|-------------|-------------|-------------|-------------|
| 101103118 | GP5          | 0.49598275  | 0.144850419 | 0.915792822 | 0.000198518 |
| 101120054 | XPNPEP2      | 0.3106546   | 0.382314414 | 0.915739152 | 0.000199011 |
| 101107546 | RNF166       | 0.328964615 | 0.353338308 | 0.915649023 | 0.000199842 |
| 101102844 | RPUSD3       | 0.462044352 | 0.17881812  | 0.914856867 | 0.000207252 |
| 101108740 | KIAA0930     | 0.414698245 | 0.233416361 | 0.914701336 | 0.00020873  |
| 101115063 | ATG13        | 0.436837337 | 0.206839145 | 0.914669537 | 0.000209033 |
| 101104032 | ZNF646       | 0.426276961 | 0.21928752  | 0.914340528 | 0.000212189 |
| 101119725 | TLE6         | 0.417973562 | 0.229368842 | 0.602315323 | 0.065368933 |
| 100302341 | GNAI2        | 0.274485561 | 0.442792835 | 0.914073141 | 0.00021478  |
| 101116260 | AEN          | 0.359125951 | 0.308130852 | 0.913939291 | 0.000216086 |
| 443451    | ATOX1        | 0.390780204 | 0.264182978 | 0.913868168 | 0.000216782 |
| 101116579 | LOC101116579 | 0.571982047 | 0.084044318 | 0.913851567 | 0.000216944 |
| 105602374 | -            | 0.532659971 | 0.112925286 | 0.913779649 | 0.00021765  |
| 101123668 | UBA7         | 0.251546316 | 0.483258327 | 0.913762279 | 0.000217821 |
| 101103065 | SNAPC2       | 0.402562526 | 0.248761751 | 0.913600634 | 0.000219415 |
| 101117118 | RGL2         | 0.42815359  | 0.217044831 | 0.913333194 | 0.000222071 |
| 101114881 | RPH3AL       | 0.303467512 | 0.393995143 | 0.913140813 | 0.000223996 |
| 101106614 | PLEKHF1      | 0.459742477 | 0.181277974 | 0.913135784 | 0.000224046 |
| 101119152 | POLR2I       | 0.442504306 | 0.200331587 | 0.912899725 | 0.000226425 |
| 101119435 | MVP          | 0.256231427 | 0.474866553 | 0.91288397  | 0.000226585 |
| 105615565 | -            | 0.465140789 | 0.175540524 | 0.91274171  | 0.000228028 |
| 101105273 | TTYH1        | 0.285499878 | 0.42393337  | 0.912739386 | 0.000228052 |
| 101102301 | NAV3         | 0.426132561 | 0.219460635 | 0.912619652 | 0.000229272 |
| 100174905 | PSMB8        | 0.432117623 | 0.212350957 | 0.912606494 | 0.000229406 |
| 101118484 | LOC101118484 | 0.386408684 | 0.270034842 | 0.912537652 | 0.00023011  |
| 101109967 | SSBP4        | 0.525724695 | 0.118586802 | 0.91239863  | 0.000231537 |
| 101109238 | WIPI2        | 0.364838901 | 0.29993075  | 0.912393908 | 0.000231586 |
| 101122538 | KCNAB2       | 0.567785232 | 0.086870699 | 0.91227655  | 0.000232795 |
| 101122654 | TFAP4        | 0.371386041 | 0.290677753 | 0.912208903 | 0.000233495 |
| 101123327 | HIP1R        | 0.317658874 | 0.371096193 | 0.912189826 | 0.000233692 |
| 101120763 | LOC101120763 | 0.415284296 | 0.232689198 | 0.336837086 | 0.341231767 |
| 106991221 | -            | 0.500481284 | 0.140669555 | 0.9120562   | 0.000235079 |
| 101118183 | NOM1         | 0.385130348 | 0.27175933  | 0.911991763 | 0.00023575  |



|           |              |             |             |              |             |
|-----------|--------------|-------------|-------------|--------------|-------------|
| 101111735 | FBXL8        | 0.425524691 | 0.220190235 | 0.911874466  | 0.000236975 |
| 101113285 | LSM10        | 0.448133972 | 0.193986298 | 0.91183773   | 0.000237359 |
| 101103078 | LIMD2        | 0.325833485 | 0.358212756 | 0.911825172  | 0.000237491 |
| 101103013 | BCL7A        | 0.583027381 | 0.076890721 | 0.911643832  | 0.000239397 |
| 105604615 | PRSS33       | 0.513257362 | 0.129202086 | 0.911582318  | 0.000240046 |
| 105614865 | -            | 0.38710327  | 0.269100353 | 0.911399801  | 0.000241979 |
| 101118896 | FAM160A2     | 0.163450459 | 0.651852243 | 0.911015957  | 0.000246083 |
| 101115644 | GFOD2        | 0.377747894 | 0.281835355 | 0.910912883  | 0.000247193 |
| 101112608 | RAB3B        | 0.227724228 | 0.526892437 | 0.910629833  | 0.000250262 |
| 101110707 | TMEM116      | 0.413375804 | 0.235061933 | 0.493898245  | 0.146813104 |
| 105613076 | -            | 0.513481938 | 0.129005865 | 0.91034896   | 0.000253335 |
| 101123515 | LOC101123515 | 0.413771404 | 0.234568987 | 0.910222303  | 0.000254729 |
| 101118187 | NFIC         | 0.413771404 | 0.234568987 | 0.910222303  | 0.000254729 |
| 101109487 | SERF2        | 0.311349251 | 0.381194515 | 0.910064125  | 0.000256479 |
| 105608016 | -            | 0.534526673 | 0.11143095  | 0.910061408  | 0.000256509 |
| 101103171 | MEAK7        | 0.311888031 | 0.380327015 | 0.9098388    | 0.000258986 |
| 101117742 | WBP1         | 0.343491365 | 0.331166435 | 0.909732739  | 0.000260173 |
| 106991679 | LOC106991679 | 0.412634764 | 0.235986895 | 0.410351113  | 0.238850208 |
| 101102096 | LOC101102096 | 0.366897693 | 0.297004407 | 0.909335516  | 0.000264652 |
| 101116048 | TBXA2R       | 0.527154847 | 0.117405135 | 0.909257152  | 0.000265543 |
| 101115380 | CRK          | -0.41200711 | 0.23677193  | -0.663353257 | 0.036522894 |
| 101120592 | HOXB6        | 0.435615569 | 0.20825794  | 0.909180866  | 0.000266412 |
| 101108744 | LRRC25       | 0.263316496 | 0.462298761 | 0.908924079  | 0.000269352 |
| 101115914 | IFRD2        | 0.429838812 | 0.215042134 | 0.908889523  | 0.000269749 |
| 101120820 | CDPF1        | 0.262628709 | 0.463512248 | 0.908879634  | 0.000269863 |
| 101118977 | BCAS4        | 0.353591241 | 0.316186433 | 0.908811659  | 0.000270646 |
| 105606169 | C22H10orf143 | 0.46809357  | 0.172448472 | 0.908798378  | 0.000270799 |
| 101113874 | PCIF1        | 0.614217245 | 0.058857976 | 0.908702296  | 0.00027191  |
| 101113876 | GPR4         | 0.424509668 | 0.22141161  | 0.90866241   | 0.000272372 |
| 101106458 | COMMD9       | 0.300804676 | 0.398366068 | 0.908366639  | 0.000275816 |
| 101102211 | -            | 0.497750533 | 0.143198549 | 0.908284346  | 0.00027678  |
| 101113618 | NFKBIB       | 0.26011487  | 0.467959502 | 0.90813629   | 0.00027852  |
| 105603705 | -            | 0.31412083  | 0.376742275 | 0.908133827  | 0.000278549 |

|           |              |              |             |              |             |
|-----------|--------------|--------------|-------------|--------------|-------------|
| 101111783 | TLE4         | -0.409140053 | 0.240376557 | -0.501820117 | 0.139439696 |
| 101123416 | IL17RC       | 0.206304313  | 0.567431379 | 0.907807766  | 0.00028241  |
| 101113226 | CENPM        | 0.502746252  | 0.13859281  | 0.907712405  | 0.000283547 |
| 101103168 | ZNF281       | -0.408652203 | 0.240992956 | -0.633249081 | 0.049361552 |
| 101113845 | KEAP1        | 0.503030953  | 0.138333106 | 0.907637001  | 0.000284448 |
| 101115470 | GRN          | 0.233119734  | 0.516871741 | 0.907580995  | 0.000285119 |
| 101119104 | RORC         | 0.40821759   | 0.241542838 | 0.691020421  | 0.026909493 |
| 101120707 | MMACHC       | 0.516286263  | 0.126571131 | 0.907533467  | 0.000285689 |
| 101106408 | MUL1         | 0.390311949  | 0.264806438 | 0.907487365  | 0.000286243 |
| 100170327 | FASN         | 0.518782834  | 0.124427713 | 0.907296919  | 0.000288539 |
| 101105264 | CLUH         | 0.512030139  | 0.130277613 | 0.907227529  | 0.000289379 |
| 101111070 | GNA12        | 0.310782869  | 0.382107502 | 0.907121556  | 0.000290665 |
| 101123498 | RNF215       | 0.407703634  | 0.242194013 | 0.69052483   | 0.027064432 |
| 101112025 | TMEM8B       | 0.407684835  | 0.242217849 | 0.557453017  | 0.09408667  |
| 101115366 | ABHD8        | 0.270971051  | 0.448889733 | 0.907000703  | 0.000292137 |
| 101110881 | SMIM4        | 0.26083779   | 0.466678651 | 0.906929918  | 0.000293002 |
| 101106975 | LOC101106975 | 0.449385792  | 0.19259153  | 0.90688008   | 0.000293612 |
| 101111418 | CPPED1       | 0.367505426  | 0.296143503 | 0.906875263  | 0.000293671 |
| 101116448 | FAM20C       | 0.388433791  | 0.267315231 | 0.906674073  | 0.000296143 |
| 101114256 | ACTG2        | 0.555017556  | 0.095841414 | 0.906471558  | 0.000298646 |
| 101112435 | UNC93B1      | 0.293629032  | 0.410259493 | 0.906398848  | 0.000299549 |
| 101119902 | CC2D1A       | 0.767679421  | 0.009524174 | 0.906386796  | 0.000299699 |
| 105610832 | LOC105610832 | 0.621950867  | 0.054865401 | 0.905731692  | 0.000307926 |
| 101102931 | C7           | -0.406391472 | 0.243860958 | -0.600084917 | 0.066639317 |
| 101102340 | ARPIN        | 0.30158908   | 0.397076093 | 0.905462074  | 0.000311359 |
| 101111516 | PPIF         | 0.577154467  | 0.080643212 | 0.905356759  | 0.000312708 |
| 101101873 | ATP2B3       | 0.451645882  | 0.190088266 | 0.905332924  | 0.000313014 |
| 106990892 | -            | 0.555261178  | 0.095664955 | 0.905331308  | 0.000313035 |
| 101113178 | CDC25A       | 0.555261178  | 0.095664955 | 0.905331308  | 0.000313035 |
| 101114825 | B4GALT2      | 0.348672789  | 0.323436426 | 0.905244839  | 0.000314146 |
| 101122493 | AP1S1        | 0.302746791  | 0.395175881 | 0.905154971  | 0.000315305 |
| 105615522 | -            | 0.361392641  | 0.304863343 | 0.905086389  | 0.000316191 |
| 101103683 | IRF7         | 0.424092338  | 0.221914901 | 0.905014233  | 0.000317125 |

|           |              |             |             |             |             |
|-----------|--------------|-------------|-------------|-------------|-------------|
| 101121011 | MED28        | 0.404958124 | 0.24568917  | 0.447731339 | 0.194436159 |
| 105609034 | ANKRD16      | 0.404872939 | 0.245798062 | 0.640903461 | 0.045849754 |
| 101110862 | PEPD         | 0.294833072 | 0.408252195 | 0.904705297 | 0.000321147 |
| 105612430 | ENTPD8       | 0.552508804 | 0.097670598 | 0.904114823 | 0.00032894  |
| 105602735 | -            | 0.552508804 | 0.097670598 | 0.904114823 | 0.00032894  |
| 101101789 | -            | 0.552508804 | 0.097670598 | 0.904114823 | 0.00032894  |
| 101122558 | PTPN23       | 0.411089969 | 0.23792168  | 0.9040694   | 0.000329545 |
| 105604738 | VKORC1       | 0.246641014 | 0.492112623 | 0.904029727 | 0.000330074 |
| 105610540 | LOC105610540 | 0.528765936 | 0.116082806 | 0.903948    | 0.000331166 |
| 443166    | SLC2A8       | 0.393336949 | 0.26079303  | 0.903387698 | 0.000338725 |
| 101119270 | ZNF205       | 0.578600118 | 0.07970878  | 0.903217402 | 0.000341047 |
| 106991907 | PAM16        | 0.44447188  | 0.198100369 | 0.903091237 | 0.000342775 |
| 101103835 | RBM42        | 0.320173461 | 0.367108996 | 0.90306304  | 0.000343162 |
| 101116186 | ZDHHC24      | 0.387821417 | 0.268136028 | 0.902983542 | 0.000344255 |
| 101122808 | RPL18        | 0.371362845 | 0.290710262 | 0.902724517 | 0.000347835 |
| 101101820 | -            | 0.515670747 | 0.127103068 | 0.902684338 | 0.000348392 |
| 101103094 | DCLK2        | 0.42388585  | 0.222164162 | 0.902561062 | 0.000350107 |
| 101118292 | MAP1LC3A     | 0.271960437 | 0.447169539 | 0.902543667 | 0.00035035  |
| 101120767 | PRXL2B       | 0.261930401 | 0.464745741 | 0.902413175 | 0.000352173 |
| 101109981 | LOC101109981 | 0.182920856 | 0.612982656 | 0.902248801 | 0.000354479 |
| 101110146 | BATF         | 0.531344157 | 0.113986132 | 0.902211818 | 0.000354999 |
| 101117555 | EVA1B        | 0.382555497 | 0.275251011 | 0.902199132 | 0.000355178 |
| 101121461 | HYAL3        | 0.501736617 | 0.139516206 | 0.902009011 | 0.000357863 |
| 101121541 | CMIP         | 0.484906055 | 0.155464564 | 0.901821211 | 0.00036053  |
| 105616895 | -            | 0.402843294 | 0.248400537 | 0.414012009 | 0.23426946  |
| 101113123 | SNX8         | 0.687233129 | 0.028109051 | 0.901500902 | 0.000365113 |
| 101110896 | NME9         | 0.496440527 | 0.144421549 | 0.90101418  | 0.000372157 |
| 101119507 | UPB1         | 0.496440527 | 0.144421549 | 0.90101418  | 0.000372157 |
| 105610408 | -            | 0.496440527 | 0.144421549 | 0.90101418  | 0.000372157 |
| 105608456 | -            | 0.496440527 | 0.144421549 | 0.90101418  | 0.000372157 |
| 106990134 | S100A3       | 0.410118991 | 0.239142338 | 0.900968713 | 0.000372821 |
| 101108848 | SPEN         | 0.527676447 | 0.116975999 | 0.900742358 | 0.000376135 |
| 101110509 | TCOF1        | 0.698661326 | 0.024596937 | 0.900627015 | 0.000377832 |

|           |              |              |             |              |             |
|-----------|--------------|--------------|-------------|--------------|-------------|
| 101106160 | SERHL2       | 0.40091268   | 0.250890217 | 0.667183904  | 0.035071556 |
| 101119253 | SNRPD3       | 0.559039802  | 0.09295449  | 0.900606975  | 0.000378127 |
| 101110576 | SLC2A4RG     | 0.520553771  | 0.122921031 | 0.900603574  | 0.000378178 |
| 101106617 | RCN3         | 0.297192922  | 0.40433158  | 0.90035723   | 0.000381824 |
| 106991479 | -            | 0.400465541  | 0.251468809 | 0.576758351  | 0.080900479 |
| 101122930 | SLC6A8       | 0.65815112   | 0.038558092 | 0.900316335  | 0.000382431 |
| 443011    | BGN          | 0.565167419  | 0.088664184 | 0.900306844  | 0.000382572 |
| 101108454 | TIMM17B      | 0.327969694  | 0.35488353  | 0.900147773  | 0.000384944 |
| 101115982 | PLTP         | 0.533175459  | 0.112511379 | 0.899794684  | 0.000390246 |
| 101109549 | RGS9         | 0.399840771  | 0.252278494 | 0.565419371  | 0.088490547 |
| 101114752 | PDLIM2       | 0.399249777  | 0.253045737 | 0.899633142  | 0.000392689 |
| 101113264 | LOC101113264 | 0.64423524   | 0.044374813 | 0.899469098  | 0.000395182 |
| 101102873 | VEGFD        | 0.330044063  | 0.351665651 | 0.899287376  | 0.000397957 |
| 101112736 | VASH1        | 0.325594325  | 0.358586453 | 0.899082481  | 0.000401103 |
| 101113858 | LOC101113858 | 0.355021837  | 0.31409379  | 0.898958951  | 0.000403009 |
| 100820740 | TNXB         | 0.365408679  | 0.299119347 | 0.898949203  | 0.000403159 |
| 101122089 | LOC101122089 | 0.571578371  | 0.084313568 | 0.898625255  | 0.000408189 |
| 101119928 | MYPOP        | 0.196574702  | 0.586227308 | 0.898611043  | 0.000408411 |
| 101117073 | HIGD2A       | 0.362866271  | 0.302748932 | 0.89828697   | 0.000413491 |
| 101109204 | ZNF404       | -0.398870624 | 0.253538643 | -0.50974496  | 0.132295008 |
| 101108451 | OGN          | 0.530207721  | 0.114907364 | 0.898203963  | 0.000414799 |
| 101122988 | NQO2         | 0.307254586  | 0.387818959 | 0.89815378   | 0.000415592 |
| 101104048 | NANS         | 0.413083793  | 0.235426176 | 0.897936712  | 0.000419033 |
| 101106071 | -            | 0.531199451  | 0.114103178 | 0.89773201   | 0.000422297 |
| 101114628 | CCL1         | 0.397560851  | 0.255245468 | 0.477086881  | 0.163232107 |
| 101120093 | LOC101120093 | 0.310162383  | 0.383108925 | 0.897674665  | 0.000423215 |
| 101122819 | LOC101122819 | 0.570679352  | 0.084915203 | 0.897572428  | 0.000424854 |
| 101101780 | -            | 0.466952592  | 0.173639392 | 0.897453457  | 0.000426768 |
| 101123224 | SWT1         | -0.396946451 | 0.256048308 | -0.718279191 | 0.019291455 |
| 105605404 | -            | 0.372006602  | 0.289808761 | 0.897441588  | 0.00042696  |
| 100329218 | SREBF1       | 0.547991281  | 0.101020017 | 0.897241167  | 0.0004302   |
| 101120342 | TMEM256      | 0.302398451  | 0.395747168 | 0.896692561  | 0.00043916  |
| 101123535 | ACER2        | 0.394344892  | 0.259463239 | 0.896644559  | 0.00043995  |

|           |              |              |             |              |             |
|-----------|--------------|--------------|-------------|--------------|-------------|
| 101114820 | HMGA1        | 0.555172347  | 0.095729273 | 0.896501118  | 0.000442319 |
| 101123511 | EHBP1L1      | 0.187823199  | 0.603326786 | 0.896041791  | 0.000449965 |
| 101115424 | GET4         | 0.522767889  | 0.121053316 | 0.895431584  | 0.000460273 |
| 101115544 | GRAMD2A      | 0.395511555  | 0.257928729 | 0.483632972  | 0.156713705 |
| 101102052 | MFAP5        | 0.416976599  | 0.230596611 | 0.895314127  | 0.000462276 |
| 101121995 | DCTPP1       | 0.38161374   | 0.276534162 | 0.895229144  | 0.00046373  |
| 101111996 | NECTIN2      | 0.432980045  | 0.211337556 | 0.895139797  | 0.000465262 |
| 101116367 | KCTD5        | 0.394850728  | 0.258797297 | 0.608961955  | 0.061677575 |
| 443211    | G6PD         | 0.199692555  | 0.580179131 | 0.894985464  | 0.000467917 |
| 101114379 | LOC101114379 | 0.61973304   | 0.055991457 | 0.894815878  | 0.000470847 |
| 101117812 | STK40        | 0.295829248  | 0.406594969 | 0.894731132  | 0.000472317 |
| 101104797 | LOC101104797 | 0.632265392  | 0.049825458 | 0.894427487  | 0.000477609 |
| 101106756 | KDM3A        | -0.394392756 | 0.259400185 | -0.892523614 | 0.000511787 |
| 443541    | PGD          | 0.229448118  | 0.523682204 | 0.89435008   | 0.000478965 |
| 101118799 | MAP3K14      | 0.312133767  | 0.379931673 | 0.894319275  | 0.000479505 |
| 101110287 | CFAP46       | 0.475098354  | 0.165243905 | 0.893919108  | 0.000486566 |
| 101107029 | RECQL4       | 0.305070194  | 0.391375628 | 0.893558137  | 0.000493001 |
| 101116497 | PROSER2      | 0.400620468  | 0.251268251 | 0.893393627  | 0.000495954 |
| 101106884 | C18H15orf39  | 0.366805385  | 0.297135286 | 0.893172265  | 0.000499948 |
| 101111733 | LOC101111733 | 0.615880486  | 0.057983641 | 0.893011949  | 0.000502855 |
| 101104033 | PCOLCE       | 0.611434811  | 0.060340002 | 0.893010976  | 0.000502872 |
| 101112632 | ZNF593       | 0.329681632  | 0.352226809 | 0.892946225  | 0.00050405  |
| 105607079 | KLF16        | 0.324589316  | 0.36015895  | 0.892653512  | 0.000509399 |
| 101120887 | ITGB5        | 0.445332397  | 0.197129117 | 0.892633239  | 0.000509771 |
| 101123025 | GGA1         | 0.308626789  | 0.385592778 | 0.892631871  | 0.000509797 |
| 101109152 | SLC66A1      | 0.475458072  | 0.164878882 | 0.892511079  | 0.000512017 |
| 101117965 | LOC101117965 | 0.54018367   | 0.106978461 | 0.892424134  | 0.00051362  |
| 101102940 | MTCH1        | 0.412104482  | 0.236650047 | 0.891868666  | 0.000523947 |
| 101117811 | THOC6        | 0.315151988  | 0.375092391 | 0.891855863  | 0.000524187 |
| 100144766 | FCGRT        | 0.392062288  | 0.262480071 | 0.688244159  | 0.027785321 |
| 105604778 | -            | 0.619600472  | 0.056059245 | 0.891822283  | 0.000524816 |
| 101103741 | METRNL       | 0.238280569  | 0.507361395 | 0.891455894  | 0.000531719 |
| 101102330 | RPS9         | 0.26188085   | 0.464833324 | 0.891279239  | 0.000535071 |

|           |              |              |             |              |             |
|-----------|--------------|--------------|-------------|--------------|-------------|
| 101105179 | LOC101105179 | 0.375907409  | 0.284378337 | 0.89106645   | 0.000539129 |
| 101109696 | NUP42        | -0.391067414 | 0.26380097  | -0.782063648 | 0.007515505 |
| 105615175 | LOC105615175 | 0.391063104  | 0.2638067   | 0.625891471  | 0.05290183  |
| 101123086 | SLX4         | 0.464632292  | 0.176076304 | 0.890910967  | 0.000542108 |
| 101108518 | ZMAT5        | 0.590778158  | 0.072114196 | 0.890791621  | 0.000544403 |
| 101104103 | ADGRL2       | 0.525058618  | 0.119139672 | 0.890779557  | 0.000544636 |
| 101105403 | PTPA         | 0.300149832  | 0.399444517 | 0.890763024  | 0.000544954 |
| 105604846 | C24H16orf91  | 0.491929244  | 0.148681822 | 0.890730382  | 0.000545584 |
| 106990972 | -            | 0.662685617  | 0.036779933 | 0.89029752   | 0.00055398  |
| 101103747 | NXT1         | 0.213589563  | 0.553510861 | 0.890115097  | 0.000557547 |
| 101122959 | MAP2K3       | 0.296510405  | 0.405463651 | 0.890060111  | 0.000558626 |
| 101110973 | LOC101110973 | 0.256326107  | 0.474697628 | 0.88940861   | 0.00057152  |
| 101119624 | -            | 0.445794762  | 0.196608403 | 0.889330123  | 0.000573088 |
| 101113927 | ANKRD23      | 0.618854974  | 0.056441466 | 0.889074325  | 0.00057822  |
| 101118911 | EHD1         | 0.228928379  | 0.52464922  | 0.888845439  | 0.00058284  |
| 105608252 | TMEM129      | 0.286706005  | 0.421891279 | 0.888567095  | 0.000588495 |
| 101109335 | LOC101109335 | 0.274231149  | 0.44323291  | 0.88834715   | 0.000592992 |
| 101115767 | PHF19        | 0.241243143  | 0.501935389 | 0.888334633  | 0.000593248 |
| 101122793 | RBPM52       | 0.458629902  | 0.182474034 | 0.887935518  | 0.000601475 |
| 101117080 | STON2        | 0.416809936  | 0.23080222  | 0.887921344  | 0.000601769 |
| 101107229 | TKT          | 0.169004903  | 0.640681603 | 0.887840997  | 0.000603436 |
| 101104133 | -            | 0.605046702  | 0.063834951 | 0.887526746  | 0.000609987 |
| 100620046 | TOB2         | -0.387916235 | 0.268008849 | -0.605935511 | 0.063340924 |
| 101118018 | RNF44        | 0.387869217  | 0.26807191  | 0.652670841  | 0.040783368 |
| 101111400 | PEX6         | 0.314080004  | 0.376807672 | 0.887107887  | 0.0006188   |
| 101111511 | SPATA1       | 0.4282701    | 0.21690603  | 0.887048055  | 0.000620067 |
| 101106378 | TKFC         | 0.506757066  | 0.134961652 | 0.88672988   | 0.000626833 |
| 101118341 | LDLRAP1      | 0.579908214  | 0.078869313 | 0.886547189  | 0.000630743 |
| 101108888 | LIMS2        | 0.423961767  | 0.222072501 | 0.886341266  | 0.000635171 |
| 101109473 | CIAO2B       | 0.489891361  | 0.150631061 | 0.88631189   | 0.000635804 |
| 105603685 | -            | 0.26233258   | 0.464035153 | 0.88629279   | 0.000636216 |
| 101103102 | GPR137       | 0.409205662  | 0.240293727 | 0.885967412  | 0.000643268 |
| 105605471 | LOC105605471 | 0.216197187  | 0.548561003 | 0.885935758  | 0.000643957 |

|           |              |              |             |              |             |
|-----------|--------------|--------------|-------------|--------------|-------------|
| 101123371 | FAM131B      | 0.331318797  | 0.349695549 | 0.885823725  | 0.0006464   |
| 101121716 | SEMA3B       | 0.477240854  | 0.163076949 | 0.885767132  | 0.000647637 |
| 101115315 | LOC101115315 | 0.581236216  | 0.07802294  | 0.885734092  | 0.000648359 |
| 101101854 | HTRA1        | 0.385672375  | 0.271027398 | 0.658155392  | 0.03855639  |
| 678680    | LGMN         | 0.385532994  | 0.27121551  | 0.589964644  | 0.072606213 |
| 105607505 | LOC105607505 | 0.343060903  | 0.331812874 | 0.885488628  | 0.000653748 |
| 101120905 | SWI5         | 0.547333196  | 0.101513925 | 0.885388355  | 0.000655958 |
| 101117241 | MIOX         | 0.309220569  | 0.384631401 | 0.885147494  | 0.00066129  |
| 101118708 | CRYL1        | 0.257848881  | 0.471984359 | 0.884869834  | 0.000667476 |
| 101118002 | MORN2        | -0.385055797 | 0.271860085 | -0.684865392 | 0.028877261 |
| 101109726 | MINDY3       | 0.3848615    | 0.272122772 | 0.366185156  | 0.298015471 |
| 101122463 | SELENOH      | 0.508179982  | 0.133687639 | 0.884479933  | 0.000676233 |
| 101123583 | MORN3        | 0.384763554  | 0.272255245 | 0.503905332  | 0.137537365 |
| 101123041 | SPARCL1      | 0.384615081  | 0.272456125 | 0.3882542    | 0.267555804 |
| 101114989 | ZNF687       | 0.274823743  | 0.442208165 | 0.883937246  | 0.000688562 |
| 101114450 | NHSL1        | 0.348215138  | 0.324115374 | 0.883741755  | 0.000693043 |
| 101111082 | CLCNKA       | 0.45510901   | 0.186289745 | 0.883475149  | 0.000699189 |
| 101117701 | ULK1         | 0.208810195  | 0.562628131 | 0.883111011  | 0.000707646 |
| 105602272 | -            | 0.323537672  | 0.361808102 | 0.882965061  | 0.000711057 |
| 101106926 | PKN3         | 0.323537672  | 0.361808102 | 0.882965061  | 0.000711057 |
| 105606937 | -            | 0.323537672  | 0.361808102 | 0.882965061  | 0.000711057 |
| 101116674 | MED29        | 0.450126547  | 0.19176896  | 0.882723752  | 0.000716723 |
| 101115632 | LOC101115632 | 0.508619294  | 0.1332958   | 0.882442299  | 0.000723373 |
| 101117721 | TAOK2        | 0.638248727  | 0.047048168 | 0.882047344  | 0.00073278  |
| 101113354 | RTN2         | 0.365787523  | 0.298580492 | 0.881930192  | 0.000735588 |
| 101108302 | ATN1         | 0.520834541  | 0.122683204 | 0.881845852  | 0.000737614 |
| 101102298 | -            | 0.574429317  | 0.082423839 | 0.881838873  | 0.000737781 |
| 101121686 | TRAPPC9      | 0.417379222  | 0.23010033  | 0.881547078  | 0.000744824 |
| 105612811 | C17H22orf39  | 0.55635857   | 0.094872662 | 0.881251429  | 0.000752009 |
| 101112187 | SH2B1        | 0.40795108   | 0.241880379 | 0.880454102  | 0.000771638 |
| 101102338 | GATB         | 0.470960391  | 0.169477687 | 0.880073516  | 0.000781138 |
| 101113694 | MRPS12       | 0.154991699  | 0.668983606 | 0.879852302  | 0.000786699 |
| 101112531 | RCC1L        | 0.596387329  | 0.068780752 | 0.878814045  | 0.000813186 |

|           |              |              |             |              |             |
|-----------|--------------|--------------|-------------|--------------|-------------|
| 105603758 | GPSM3        | 0.235726547  | 0.51205874  | 0.8785156    | 0.000820919 |
| 101105185 | LOC101105185 | 0.285014132  | 0.424757085 | 0.878345724  | 0.000825344 |
| 101111913 | GLYCTK       | 0.46456789   | 0.176144231 | 0.878273809  | 0.000827223 |
| 101115735 | PPIL2        | 0.479784186  | 0.160526846 | 0.877782914  | 0.00084013  |
| 101117428 | MRPL57       | 0.649732295  | 0.042011394 | 0.877512487  | 0.000847302 |
| 100642181 | SRD5A1       | 0.231489684  | 0.519890786 | 0.876749126  | 0.00086779  |
| 101112850 | RITA1        | 0.430200705  | 0.214613453 | 0.876665755  | 0.000870049 |
| 105608522 | LOC105608522 | 0.440467437  | 0.202656704 | 0.876531624  | 0.000873693 |
| 101115381 | LOC101115381 | 0.267991732  | 0.454087745 | 0.876151106  | 0.000884091 |
| 101104951 | APCDD1       | 0.267991732  | 0.454087745 | 0.876151106  | 0.000884091 |
| 101114707 | ZNF219       | 0.267991732  | 0.454087745 | 0.876151106  | 0.000884091 |
| 101105557 | SHB          | 0.267991732  | 0.454087745 | 0.876151106  | 0.000884091 |
| 101107767 | RENBP        | 0.627105851  | 0.052306249 | 0.876060062  | 0.000886592 |
| 101112212 | GLT8D2       | 0.624983048  | 0.053350287 | 0.876014573  | 0.000887843 |
| 101112621 | TBL3         | 0.400279874  | 0.251709277 | 0.875863224  | 0.000892017 |
| 101112550 | OST4         | 0.649883428  | 0.041947638 | 0.875817275  | 0.000893286 |
| 101118176 | PARVB        | 0.367122226  | 0.296686182 | 0.875757336  | 0.000894945 |
| 101110137 | VAV2         | 0.423166545  | 0.223033716 | 0.875704422  | 0.000896411 |
| 101115266 | RNF144A      | 0.580432517  | 0.078534454 | 0.875564433  | 0.000900298 |
| 101110786 | PPP1R14A     | 0.40766489   | 0.24224314  | 0.875453204  | 0.000903395 |
| 101122497 | SIK1         | 0.475372699  | 0.16496547  | 0.875445016  | 0.000903623 |
| 101106601 | WDFY2        | 0.647888844  | 0.042794315 | 0.875382953  | 0.000905355 |
| 105610672 | -            | 0.656283306  | 0.039307086 | 0.87533602   | 0.000906666 |
| 101108149 | FAM107B      | -0.375315489 | 0.285198808 | -0.740756678 | 0.01425294  |
| 105614947 | -            | 0.656283306  | 0.039307086 | 0.87533602   | 0.000906666 |
| 101105455 | CD248        | 0.656283306  | 0.039307086 | 0.87533602   | 0.000906666 |
| 105606176 | NKX1-2       | 0.656283306  | 0.039307086 | 0.87533602   | 0.000906666 |
| 101120648 | EFEMP1       | 0.656283306  | 0.039307086 | 0.87533602   | 0.000906666 |
| 101108893 | CAPZB        | 0.43271068   | 0.211653778 | 0.875249193  | 0.000909095 |
| 101111979 | MED11        | 0.296642208  | 0.405244915 | 0.874721109  | 0.000923973 |
| 101111216 | CHMP4B       | 0.514988039  | 0.12769469  | 0.874348368  | 0.00093458  |
| 101121420 | LOC101121420 | 0.631025636  | 0.050414248 | 0.874082002  | 0.000942214 |
| 101116874 | CCDC88B      | 0.362269212  | 0.303604671 | 0.873994755  | 0.000944725 |



|           |              |              |             |              |             |
|-----------|--------------|--------------|-------------|--------------|-------------|
| 101122917 | TNK2         | 0.20679869   | 0.566482523 | 0.873193032  | 0.000968022 |
| 105605689 | -            | 0.20679869   | 0.566482523 | 0.873193032  | 0.000968022 |
| 101110710 | LOC101110710 | 0.369236795  | 0.293698186 | 0.873135061  | 0.000969723 |
| 105605967 | -            | 0.371611887  | 0.290361332 | 0.873097141  | 0.000970836 |
| 101122787 | HSD17B11     | 0.372687603  | 0.288856741 | 0.536368141  | 0.109969035 |
| 101104282 | MYBPHL       | 0.372455322  | 0.289181275 | 0.542689508  | 0.105042588 |
| 101118511 | LOC101118511 | -0.372374448 | 0.289294314 | -0.391036843 | 0.263841617 |
| 100913151 | FOXO3        | 0.375161905  | 0.285411901 | 0.872919913  | 0.000976053 |
| 101109713 | HNF4G        | 0.276161991  | 0.439897981 | 0.87269334   | 0.000982753 |
| 105603310 | LOC105603310 | 0.276161991  | 0.439897981 | 0.87269334   | 0.000982753 |
| 101111408 | NUDT8        | 0.313801275  | 0.377254295 | 0.872656952  | 0.000983832 |
| 101102254 | LOC101102254 | 0.391046855  | 0.263828305 | 0.872568401  | 0.000986461 |
| 101116898 | APLF         | -0.37128399  | 0.290820791 | -0.6705603   | 0.03382514  |
| 654329    | NUDT16       | 0.277157791  | 0.438182549 | 0.872460759  | 0.000989664 |
| 106991289 | -            | 0.16883997   | 0.641012383 | 0.872332643  | 0.000993487 |
| 101107006 | PTDSS2       | 0.695214475  | 0.025622519 | 0.872214722  | 0.000997014 |
| 443226    | TIMELESS     | 0.387623542  | 0.268401545 | 0.872127527  | 0.000999629 |
| 101116309 | HMG20B       | 0.43075781   | 0.213954494 | 0.871717796  | 0.00101198  |
| 101119470 | NDUFA2       | 0.477219874  | 0.163098086 | 0.871593374  | 0.001015753 |
| 101112132 | GTPBP3       | 0.385219559  | 0.271638789 | 0.870766583  | 0.001041084 |
| 101112099 | CALHM2       | 0.630094975  | 0.05085927  | 0.870740566  | 0.001041888 |
| 101121454 | SERPING1     | 0.368634186  | 0.294548058 | 0.637259814  | 0.047499881 |
| 101113261 | IL34         | 0.450263078  | 0.191617574 | 0.870441457  | 0.001051169 |
| 101118499 | FXVD4        | 0.399766694  | 0.252374591 | 0.870439579  | 0.001051228 |
| 101111251 | ZMIZ1        | 0.367796673  | 0.2957314   | 0.593874311  | 0.070261489 |
| 105602860 | -            | 0.694788262  | 0.025751338 | 0.870351112  | 0.001053985 |
| 101104745 | LOC101104745 | 0.367432203  | 0.296247159 | 0.486612467  | 0.153799708 |
| 101107041 | TSEN34       | 0.450011821  | 0.191896222 | 0.869887664  | 0.001068512 |
| 100145856 | HEXA         | 0.235332501  | 0.512785075 | 0.86987721   | 0.001068841 |
| 101115199 | RDH5         | 0.480038639  | 0.160273044 | 0.869789002  | 0.001071624 |
| 443076    | MET          | 0.478806751  | 0.161504025 | 0.86970188   | 0.001074377 |
| 101107424 | RCC2         | 0.299477767  | 0.400552782 | 0.869537495  | 0.001079585 |
| 101111728 | TMEM51       | 0.541807657  | 0.105721316 | 0.869251691  | 0.001088684 |

|           |              |              |             |              |             |
|-----------|--------------|--------------|-------------|--------------|-------------|
| 101105362 | SNX33        | 0.365982027  | 0.298304038 | 0.869111809  | 0.001093158 |
| 101112992 | ABR          | 0.260507344  | 0.467263934 | 0.869015051  | 0.00109626  |
| 101105013 | MNT          | 0.416655024  | 0.230993426 | 0.868490518  | 0.00111319  |
| 100462690 | CRISP2       | 0.415594836  | 0.232304404 | 0.867936938  | 0.001131262 |
| 101104146 | LOC101104146 | 0.415594836  | 0.232304404 | 0.867936938  | 0.001131262 |
| 101108900 | -            | 0.415594836  | 0.232304404 | 0.867936938  | 0.001131262 |
| 106991326 | -            | 0.415594836  | 0.232304404 | 0.867936938  | 0.001131262 |
| 101101812 | -            | 0.415594836  | 0.232304404 | 0.867936938  | 0.001131262 |
| 106991155 | -            | 0.415594836  | 0.232304404 | 0.867936938  | 0.001131262 |
| 101120100 | AP5S1        | 0.605402244  | 0.063637028 | 0.867879061  | 0.001133164 |
| 101109942 | PHC2         | 0.232736577  | 0.51758074  | 0.867670319  | 0.001140042 |
| 101123475 | EMC6         | 0.483541681  | 0.156803511 | 0.867358285  | 0.001150381 |
| 443411    | FXYD6        | 0.534627037  | 0.111350959 | 0.867307174  | 0.001152081 |
| 101109813 | ARL4D        | 0.464071623  | 0.176668179 | 0.867014227  | 0.001161859 |
| 101118390 | MAGI1        | 0.364596942  | 0.30027567  | 0.629233134  | 0.051273705 |
| 101120414 | SPTB         | 0.540164198  | 0.106993592 | 0.866536392  | 0.001177938 |
| 101119881 | -            | 0.221665535  | 0.53823798  | 0.866490391  | 0.001179494 |
| 101116736 | RNF146       | -0.363873894 | 0.301307652 | -0.761962177 | 0.010418453 |
| 101108703 | KCNK7        | 0.221665535  | 0.53823798  | 0.866490391  | 0.001179494 |
| 105604626 | LOC105604626 | 0.499427379  | 0.141642331 | 0.866316441  | 0.001185393 |
| 101117580 | BCL2L13      | 0.043413377  | 0.905212021 | 0.866152373  | 0.001190977 |
| 105604784 | LOC105604784 | 0.703826091  | 0.023113512 | 0.86608482   | 0.001193281 |
| 101110222 | CDCA3        | 0.537908106  | 0.108755781 | 0.865949124  | 0.00119792  |
| 101110364 | MMP11        | 0.249552621  | 0.486848688 | 0.865610204  | 0.001209563 |
| 101122030 | DNAAF4       | -0.362696715 | 0.302991819 | -0.740817786 | 0.014240659 |
| 101102938 | TMEM40       | 0.702007331  | 0.02362867  | 0.86543174   | 0.001215727 |
| 101113535 | NDN          | 0.475003867  | 0.165339865 | 0.865209449  | 0.001223437 |
| 105603536 | LOC105603536 | -0.362561516 | 0.303185565 | -0.686862231 | 0.028228456 |
| 101114290 | NUAK2        | 0.604400531  | 0.064195695 | 0.865170565  | 0.001224789 |
| 101117602 | SPSB1        | 0.604400531  | 0.064195695 | 0.865170565  | 0.001224789 |
| 105604881 | C24H7orf50   | 0.23790068   | 0.50805894  | 0.865067056  | 0.001228394 |
| 101112505 | CHMP2A       | 0.297583164  | 0.403684977 | 0.864987268  | 0.001231178 |
| 101113026 | PMVK         | 0.421268894  | 0.225337042 | 0.864915997  | 0.001233669 |

|           |              |              |             |              |             |
|-----------|--------------|--------------|-------------|--------------|-------------|
| 101112822 | LOC101112822 | 0.329260846  | 0.352878884 | 0.864864042  | 0.001235487 |
| 101109073 | GPBAR1       | 0.24779457   | 0.490024186 | 0.864709864  | 0.001240894 |
| 101109176 | SLC25A23     | 0.676031494  | 0.031869784 | 0.864417842  | 0.001251181 |
| 101102599 | PPP1R14B     | 0.179939948  | 0.618880415 | 0.864368907  | 0.001252911 |
| 101115487 | RPS10        | 0.303597752  | 0.393781956 | 0.864270911  | 0.00125638  |
| 105614765 | LOC105614765 | -0.361273408 | 0.305034763 | -0.649692106 | 0.042028359 |
| 101104925 | TFAP2C       | 0.361160244  | 0.305197504 | 0.429500743  | 0.215443036 |
| 101119880 | HSD17B10     | 0.301559424  | 0.397124827 | 0.864220124  | 0.001258181 |
| 101112206 | LOC101112206 | 0.489487808  | 0.151018888 | 0.864176594  | 0.001259726 |
| 101121337 | BRD1         | 0.229389009  | 0.523792144 | 0.864123038  | 0.001261629 |
| 101113953 | -            | 0.32927619   | 0.352855095 | 0.864019678  | 0.001265307 |
| 101104940 | ZFAND3       | 0.222995497  | 0.535739143 | 0.863942996  | 0.001268041 |
| 101115197 | HAAO         | 0.222428989  | 0.536802972 | 0.863720634  | 0.001275992 |
| 106990843 | LOC106990843 | 0.327116539  | 0.356211276 | 0.863711595  | 0.001276316 |
| 101116704 | SIT1         | 0.405412904  | 0.245108278 | 0.863444296  | 0.001285924 |
| 106991028 | -            | 0.359566992  | 0.307493635 | 0.675249861  | 0.032144303 |
| 101107815 | CNOT3        | 0.468780532  | 0.171733793 | 0.863195699  | 0.001294907 |
| 101102115 | SLC12A9      | 0.352000906  | 0.318521272 | 0.863169725  | 0.001295849 |
| 101114403 | POU2F1       | -0.358771002 | 0.308644189 | -0.569777581 | 0.085521445 |
| 101105422 | ALDOC        | 0.569250788  | 0.08587688  | 0.863145726  | 0.001296719 |
| 106991118 | -            | 0.357809343  | 0.310037226 | 0.662617472  | 0.036806237 |
| 101122137 | DGCR8        | 0.770633392  | 0.009084007 | 0.863139869  | 0.001296931 |
| 101110880 | OXSRI        | -0.35699252  | 0.311223052 | -0.63387625  | 0.049067286 |
| 101108250 | RIC3         | 0.348634733  | 0.323492856 | 0.862846614  | 0.001307598 |
| 100913160 | YAP1         | 0.356710827  | 0.311632552 | 0.667450664  | 0.034971967 |
| 101119939 | TM2D3        | 0.356562262  | 0.311848637 | 0.687820239  | 0.027920748 |
| 101102893 | NAGK         | 0.601204457  | 0.065999654 | 0.862504748  | 0.001320114 |
| 101119596 | KCNQ1        | 0.362140717  | 0.303789006 | 0.862402608  | 0.00132387  |
| 101114311 | CCDC197      | 0.362140717  | 0.303789006 | 0.862402608  | 0.00132387  |
| 101102139 | FAM83F       | 0.362140717  | 0.303789006 | 0.862402608  | 0.00132387  |
| 101104665 | MRPL52       | 0.657505137  | 0.038816033 | 0.862298191  | 0.001327718 |
| 101110078 | RABIF        | 0.595561792  | 0.069264912 | 0.86210031   | 0.001335033 |
| 101121684 | ZFP36L1      | 0.32523421   | 0.359149513 | 0.861845637  | 0.00134449  |

|           |              |             |             |             |             |
|-----------|--------------|-------------|-------------|-------------|-------------|
| 105616119 | -            | 0.354561331 | 0.314766613 | 0.616398475 | 0.057713105 |
| 106991597 | LOC106991597 | 0.301557767 | 0.39712755  | 0.861360374 | 0.001362643 |
| 101104839 | TSP0AP1      | 0.301557767 | 0.39712755  | 0.861360374 | 0.001362643 |
| 101107580 | TMEM222      | 0.193132564 | 0.59293146  | 0.861314706 | 0.001364361 |
| 494435    | SLC9A1       | 0.742469687 | 0.013911452 | 0.861023627 | 0.001375345 |
| 101122149 | TSPAN4       | 0.466492752 | 0.174120739 | 0.86092918  | 0.001378923 |
| 101106199 | LOC101106199 | 0.254413104 | 0.478115852 | 0.860835633 | 0.001382474 |
| 100125621 | PLIN3        | 0.158396651 | 0.662070569 | 0.860596868 | 0.001391566 |
| 101122311 | LOC101122311 | 0.352662468 | 0.317548915 | 0.490585879 | 0.149965021 |
| 101120560 | ZNF74        | 0.731459105 | 0.016209096 | 0.860564884 | 0.001392787 |
| 101109236 | TELO2        | 0.460422985 | 0.180548692 | 0.860522011 | 0.001394425 |
| 101117257 | UNC45B       | 0.353854568 | 0.315800698 | 0.859972517 | 0.001415546 |
| 101116871 | CHCHD6       | 0.280314092 | 0.432765644 | 0.859896291 | 0.001418494 |
| 100145868 | ERP29        | 0.351455936 | 0.31932343  | 0.68000142  | 0.030500077 |
| 100820747 | GATA1        | 0.388055703 | 0.267821839 | 0.859676918 | 0.001427003 |
| 101107806 | NOTUM        | 0.368066952 | 0.29534924  | 0.859309802 | 0.001441326 |
| 101108757 | ALDH8A1      | 0.479102297 | 0.161208181 | 0.858995239 | 0.001453681 |
| 101108351 | TMEM258      | 0.37308321  | 0.288304466 | 0.858988707 | 0.001453938 |
| 106991016 | LOC106991016 | 0.461569659 | 0.179323764 | 0.858800353 | 0.001461374 |
| 101119209 | HK3          | 0.144080771 | 0.691285058 | 0.858610835 | 0.001468883 |
| 101103509 | SETD1B       | 0.370310196 | 0.292187597 | 0.858403507 | 0.00147713  |
| 101119667 | BACE1        | 0.505739255 | 0.135877517 | 0.858008427 | 0.001492939 |
| 101115304 | EXOC3L2      | 0.349109123 | 0.322789792 | 0.32153843  | 0.364953622 |
| 101117179 | HES2         | 0.349079135 | 0.322834211 | 0.63871188  | 0.0468376   |
| 105602721 | LOC105602721 | 0.580064045 | 0.078769691 | 0.857941592 | 0.001495625 |
| 101103527 | STX4         | 0.311327555 | 0.381229468 | 0.857788717 | 0.001501783 |
| 106991156 | LOC106991156 | 0.382358881 | 0.275518634 | 0.857298867 | 0.001521638 |
| 101107434 | SCUBE1       | 0.403427067 | 0.247650439 | 0.857234558 | 0.001524259 |
| 101108506 | KIF21B       | 0.347478464 | 0.325209819 | 0.695553536 | 0.025520357 |
| 101115294 | TNRC6C       | 0.584591086 | 0.07591103  | 0.856495338 | 0.001554619 |
| 101104572 | LPAR2        | 0.368851946 | 0.294240795 | 0.856461022 | 0.001556039 |
| 101103332 | STARD3       | 0.300626371 | 0.398659575 | 0.85615561  | 0.001568718 |
| 101114421 | RETREG2      | 0.347287336 | 0.325494081 | 0.687749135 | 0.027943507 |

|           |              |              |             |              |             |
|-----------|--------------|--------------|-------------|--------------|-------------|
| 101108207 | TEX261       | 0.300963275  | 0.398105085 | 0.855836369  | 0.001582051 |
| 101113214 | SPACA9       | 0.506690186  | 0.135021717 | 0.855401177  | 0.001600358 |
| 101116590 | JCAD         | -0.347026165 | 0.325882728 | -0.716647505 | 0.01969928  |
| 101108553 | ZNF395       | 0.506690186  | 0.135021717 | 0.855401177  | 0.001600358 |
| 101121190 | LOC101121190 | 0.506690186  | 0.135021717 | 0.855401177  | 0.001600358 |
| 105616094 | -            | 0.346669201  | 0.326414312 | 0.504884762  | 0.136649363 |
| 101110640 | PCBP3        | 0.359707355  | 0.307290985 | 0.85488398   | 0.001622314 |
| 101111820 | WNK4         | 0.519690834  | 0.123653779 | 0.854754806  | 0.001627832 |
| 101115643 | LDHD         | 0.210036982  | 0.560282369 | 0.854591421  | 0.00163483  |
| 105606266 | LOC105606266 | 0.383225189  | 0.274340525 | 0.854570295  | 0.001635737 |
| 101102765 | LOC101102765 | 0.363383407  | 0.302008777 | 0.854350842  | 0.001645175 |
| 101111570 | TOMM40       | 0.608292701  | 0.062042898 | 0.854137505  | 0.001654388 |
| 101108523 | WDR6         | 0.726903114  | 0.017232639 | 0.854007179  | 0.001660034 |
| 780451    | CESSA        | 0.60599365   | 0.063308696 | 0.853600211  | 0.001677756 |
| 101107813 | PIEZO1       | 0.531182283  | 0.114117069 | 0.853247145  | 0.001693241 |
| 101113838 | TFPI2        | 0.343389277  | 0.331319686 | 0.443247493  | 0.199487108 |
| 101117853 | DLL1         | 0.343332488  | 0.331404951 | 0.674420984  | 0.032437167 |
| 101102793 | SEC61B       | 0.606050287  | 0.063277312 | 0.853114944  | 0.001699066 |
| 101116606 | NUBPL        | -0.34248346  | 0.332681058 | -0.706330526 | 0.022416861 |
| 101122452 | SLC16A5      | 0.122417823  | 0.736188175 | 0.853002268  | 0.001704042 |
| 101115420 | LOC101115420 | 0.365063543  | 0.299610705 | 0.852809711  | 0.00171257  |
| 101120343 | PCGF2        | 0.308506491  | 0.385787693 | 0.8527114    | 0.001716936 |
| 101104363 | SERPINB11    | 0.400260846  | 0.251733929 | 0.852438549  | 0.001729096 |
| 101120856 | PSENN        | 0.314610535  | 0.375958287 | 0.852308082  | 0.001734932 |
| 101121257 | RASGEF1C     | 0.33123823   | 0.3498199   | 0.851829757  | 0.001756451 |
| 101103943 | FBRS         | 0.245650677  | 0.493908597 | 0.851274515  | 0.001781672 |
| 101109872 | BRD3         | 0.339064614  | 0.337845181 | 0.640145754  | 0.046189696 |
| 101110964 | LOC101110964 | 0.339050466  | 0.337866636 | 0.400003128  | 0.252067944 |
| 101105839 | MIXL1        | 0.258423502  | 0.470962279 | 0.85097682   | 0.001795302 |
| 105605805 | LOC105605805 | 0.360858602  | 0.305631521 | 0.850939751  | 0.001797004 |
| 101110900 | LIMK1        | 0.446675979  | 0.195618201 | 0.850488295  | 0.001817832 |
| 101102224 | ZMYND19      | 0.371809802  | 0.290084196 | 0.849889268  | 0.001845736 |
| 101112930 | LOC101112930 | 0.443330203  | 0.199393253 | 0.849272753  | 0.001874778 |

|           |              |              |             |              |             |
|-----------|--------------|--------------|-------------|--------------|-------------|
| 101122622 | ZNF792       | -0.337277051 | 0.340561505 | -0.694124984 | 0.025952689 |
| 101119899 | MICALL1      | 0.74816263   | 0.012817639 | 0.849214178  | 0.001877554 |
| 106991838 | -            | 0.337195818  | 0.340685209 | 0.695737421  | 0.025465068 |
| 101114037 | COQ8A        | 0.60540056   | 0.063637964 | 0.849151027  | 0.001880551 |
| 101103928 | ADSS1        | 0.560206278  | 0.092127774 | 0.84852017   | 0.001910676 |
| 101120812 | LOXL2        | 0.731228982  | 0.016259754 | 0.848424939  | 0.001915253 |
| 101102365 | JTB          | 0.32057299   | 0.366477461 | 0.848376589  | 0.00191758  |
| 101117373 | ZBTB22       | 0.399265755  | 0.253024977 | 0.847874887  | 0.001941849 |
| 101114255 | NCK2         | 0.702876959  | 0.023381376 | 0.847827367  | 0.001944159 |
| 101118428 | ZER1         | 0.309573971  | 0.384059768 | 0.847443944  | 0.001962871 |
| 101106282 | LOC101106282 | 0.33510347   | 0.343879376 | 0.63465283   | 0.04870454  |
| 101119357 | PHLPP1       | 0.57960065   | 0.079066175 | 0.847259742  | 0.001971907 |
| 101102543 | LOC101102543 | 0.331117052  | 0.350006973 | 0.847106789  | 0.001979433 |
| 101106927 | CCDC142      | 0.43194988   | 0.212548391 | 0.846771507  | 0.001996002 |
| 101104888 | MAP3K15      | 0.333785581  | 0.345899049 | 0.846145875  | 0.002027188 |
| 101119586 | POP5         | 0.439008712  | 0.204331436 | 0.845696282  | 0.002049816 |
| 101117172 | MICU2        | -0.332185557 | 0.348359171 | -0.85663188  | 0.001548978 |
| 101107810 | RGS19        | 0.250648945  | 0.484872942 | 0.845124949  | 0.002078833 |
| 105602113 | LOC105602113 | 0.490355097  | 0.150186142 | 0.844878864  | 0.002091423 |
| 105605734 | -            | 0.331559458  | 0.349324237 | 0.387453822  | 0.268629396 |
| 101123189 | C1QC         | 0.565541298  | 0.088406597 | 0.844535718  | 0.002109069 |
| 101122687 | CBX7         | 0.298653617  | 0.401913849 | 0.8441465    | 0.002129215 |
| 101106184 | TMEM107      | 0.576652057  | 0.080969604 | 0.844112231  | 0.002130996 |
| 105616708 | LOC105616708 | 0.439395396  | 0.203886713 | 0.843335837  | 0.002171621 |
| 105614874 | -            | 0.330860938  | 0.350402527 | 0.608199489  | 0.062093892 |
| 101122693 | MAST1        | 0.423942608  | 0.222095631 | 0.843174589  | 0.002180128 |
| 101114988 | IGHMBP2      | 0.152871361  | 0.673299882 | 0.842495462  | 0.002216221 |
| 105604572 | -            | 0.239941175  | 0.504316944 | 0.841931783  | 0.002246505 |
| 101114561 | OTUB2        | 0.440376371  | 0.202761021 | 0.841743864  | 0.002256667 |
| 101107127 | PRRG2        | 0.186150813  | 0.606614657 | 0.840444761  | 0.002327828 |
| 101113439 | MAP4         | 0.259454586  | 0.469130732 | 0.839832592  | 0.002361916 |
| 101110190 | TTC39A       | 0.475006005  | 0.165337693 | 0.839819336  | 0.002362658 |
| 101108085 | LOC101108085 | 0.414377408  | 0.233814994 | 0.839431102  | 0.002384468 |

|           |              |              |             |              |             |
|-----------|--------------|--------------|-------------|--------------|-------------|
| 101112273 | PIK3AP1      | -0.328761089 | 0.353654129 | -0.706027089 | 0.022500487 |
| 101112932 | ABCC10       | 0.390870174  | 0.26406328  | 0.839315211  | 0.002391006 |
| 101110749 | MLF2         | 0.496238958  | 0.144610294 | 0.838555913  | 0.002434164 |
| 101110596 | GPX2         | 0.589249446  | 0.073040567 | 0.83843351   | 0.002441173 |
| 443542    | ATP5MC2      | 0.263201389  | 0.46250175  | 0.838417047  | 0.002442117 |
| 106991502 | LOC106991502 | 0.591787018  | 0.071507054 | 0.838397472  | 0.00244324  |
| 101120574 | LOC101120574 | 0.545222696  | 0.103108212 | 0.838382922  | 0.002444075 |
| 105608356 | LOC105608356 | -0.327407325 | 0.355758452 | -0.632976837 | 0.049489652 |
| 101112415 | SCAF1        | 0.460224131  | 0.180761619 | 0.838373252  | 0.002444629 |
| 100499498 | MKRN1        | 0.22593464   | 0.530233457 | 0.837979365  | 0.002467308 |
| 101122734 | TUBB2A       | 0.474943259  | 0.165401435 | 0.836977448  | 0.002525677 |
| 101120449 | ILRUN        | 0.725087577  | 0.017652736 | 0.836901009  | 0.00253017  |
| 101113945 | ATXN7L3      | 0.334308771  | 0.345096537 | 0.836267162  | 0.002567655 |
| 105609508 | LOC105609508 | 0.247440885  | 0.490664106 | 0.836211083  | 0.00257099  |
| 101123140 | TGM2         | 0.27535075   | 0.441297746 | 0.836017909  | 0.002582504 |
| 101107219 | DPAGT1       | 0.326171715  | 0.357684594 | 0.654459636  | 0.040047774 |
| 105605768 | LOC105605768 | 0.573830651  | 0.082818374 | 0.83530979   | 0.002625028 |
| 101117884 | MSH5         | 0.433133789  | 0.21115719  | 0.835306856  | 0.002625205 |
| 106991485 | -            | 0.597639403  | 0.068050663 | 0.835146023  | 0.002634934 |
| 101110457 | LOC101110457 | 0.377886229  | 0.281644717 | 0.834183503  | 0.0026937   |
| 101117829 | SELENON      | 0.665289919  | 0.035784165 | 0.833666811  | 0.002725633 |
| 101104324 | LRRC63       | 0.665289919  | 0.035784165 | 0.833666811  | 0.002725633 |
| 100174906 | ITM2C        | 0.221344697  | 0.538841494 | 0.833549986  | 0.00273289  |
| 101112654 | AGPAT4       | 0.062915639  | 0.862915531 | 0.833463754  | 0.002738256 |
| 101112769 | ZNRD1        | 0.407733425  | 0.242156241 | 0.833272172  | 0.002750205 |
| 101102887 | RNF181       | 0.286311092  | 0.422559398 | 0.833121071  | 0.002759656 |
| 101106993 | ARMC5        | 0.70315128   | 0.023303739 | 0.832771466  | 0.002781611 |
| 101113269 | CAPN5        | 0.322400919  | 0.363594954 | 0.649928318  | 0.041928713 |
| 106990156 | -            | 0.322383439  | 0.363622465 | 0.659982538  | 0.037833094 |
| 101120758 | COL14A1      | 0.322383439  | 0.363622465 | 0.659982538  | 0.037833094 |
| 101117031 | LOC101117031 | 0.322383439  | 0.363622465 | 0.659982538  | 0.037833094 |
| 101107824 | SYN2         | 0.322383439  | 0.363622465 | 0.659982538  | 0.037833094 |
| 101122467 | CDC42BPB     | 0.322383439  | 0.363622465 | 0.659982538  | 0.037833094 |

|           |              |              |             |              |             |
|-----------|--------------|--------------|-------------|--------------|-------------|
| 105605666 | LOC105605666 | 0.322383439  | 0.363622465 | 0.659982538  | 0.037833094 |
| 101119941 | LOC101119941 | 0.322383439  | 0.363622465 | 0.659982538  | 0.037833094 |
| 101111528 | LOC101111528 | 0.401249799  | 0.25045448  | 0.832400253  | 0.002805061 |
| 101102688 | LOC101102688 | 0.761949875  | 0.010420438 | 0.832357152  | 0.002807793 |
| 101108223 | LOC101108223 | 0.761949875  | 0.010420438 | 0.832357152  | 0.002807793 |
| 101121951 | NT5C         | 0.277985803  | 0.436758501 | 0.831864556  | 0.002839152 |
| 101110686 | CORO6        | 0.337681796  | 0.339945494 | 0.831745349  | 0.002846779 |
| 101113830 | ASIC4        | 0.763513319  | 0.010170224 | 0.831469062  | 0.002864512 |
| 101110272 | KLF13        | 0.23468878   | 0.513972548 | 0.831157936  | 0.002884575 |
| 101112433 | BANF1        | 0.318472152  | 0.369804301 | 0.537309076  | 0.109226718 |
| 106991149 | -            | 0.431683047  | 0.21286267  | 0.831132671  | 0.002886209 |
| 101119393 | LOC101119393 | 0.318128262  | 0.370350299 | 0.512041322  | 0.130267787 |
| 105609801 | LOC105609801 | 0.605437169  | 0.063617607 | 0.830713066  | 0.00291344  |
| 101114785 | RNASET2      | 0.326668757  | 0.356909147 | 0.830647948  | 0.002917682 |
| 101113367 | KIFC1        | 0.770398368  | 0.00911849  | 0.830369736  | 0.002935857 |
| 101109030 | LRRN2        | 0.394647189  | 0.259065147 | 0.830220481  | 0.002945641 |
| 101117612 | EML2         | 0.264179563  | 0.460778027 | 0.829756675  | 0.002976195 |
| 101111219 | EIF3K        | 0.195591994  | 0.588138437 | 0.828428382  | 0.003064959 |
| 101116307 | KIAA0895     | 0.523820907  | 0.12017128  | 0.828233342  | 0.003078151 |
| 101114770 | SLC6A12      | 0.426166262  | 0.219420224 | 0.82783629   | 0.003105133 |
| 101105058 | SMPDL3B      | 0.441610597  | 0.201349851 | 0.827181132  | 0.003150026 |
| 443369    | PADI3        | 0.23513423   | 0.513150703 | 0.827064331  | 0.003158078 |
| 101114095 | ACVRL1       | 0.312523818  | 0.379304568 | 0.826715825  | 0.003182191 |
| 105611484 | MEIKIN       | 0.021249196  | 0.953538365 | 0.826544944  | 0.003194063 |
| 105604364 | LOC105604364 | 0.465232312  | 0.175444194 | 0.825961611  | 0.003234829 |
| 101120504 | CUEDC1       | 0.309036176  | 0.384929823 | 0.825623989  | 0.003258594 |
| 101105895 | ALDH4A1      | 0.433324603  | 0.210933458 | 0.825292409  | 0.003282055 |
| 101102744 | SOX15        | 0.433324603  | 0.210933458 | 0.825292409  | 0.003282055 |
| 101104357 | HRAS         | 0.362817724  | 0.302818465 | 0.824992213  | 0.0033034   |
| 100174988 | ITM2B        | -0.313327684 | 0.378013755 | -0.582271606 | 0.07736715  |
| 101104499 | FBXL4        | -0.313160252 | 0.378282433 | -0.754171891 | 0.011729931 |
| 101122289 | SHPK         | 0.680428211  | 0.030355255 | 0.824877338  | 0.003311594 |
| 106990166 | -            | 0.492345215  | 0.148285839 | 0.82479145   | 0.003317731 |



|           |              |             |             |             |             |
|-----------|--------------|-------------|-------------|-------------|-------------|
| 101115341 | BFSP2        | 0.036987425 | 0.919200607 | 0.824686785 | 0.003325219 |
| 101110365 | ARID3B       | 0.471956087 | 0.168453081 | 0.824389357 | 0.003346566 |
| 105616901 | LOC105616901 | 0.378894675 | 0.280257097 | 0.823989677 | 0.003375407 |
| 101113422 | MAFG         | 0.158527242 | 0.661805885 | 0.823801519 | 0.003389046 |
| 101123030 | MINDY4       | 0.62185807  | 0.054912214 | 0.823755401 | 0.003392395 |
| 101122916 | MAP11        | 0.418845665 | 0.228297884 | 0.823723866 | 0.003394686 |
| 105603073 | -            | 0.311555908 | 0.380861659 | 0.58350387  | 0.07659133  |
| 101107533 | KIFC2        | 0.431295043 | 0.213320142 | 0.823502788 | 0.003410781 |
| 101120042 | LOC101120042 | 0.50142804  | 0.139799175 | 0.822462182 | 0.003487276 |
| 554321    | LTF          | 0.516444621 | 0.126434498 | 0.821975848 | 0.003523446 |
| 105609231 | LOC105609231 | 0.30972318  | 0.383818545 | 0.821837239 | 0.003533803 |
| 106992027 | LOC106992027 | 0.30972318  | 0.383818545 | 0.821837239 | 0.003533803 |
| 101111990 | LOC101111990 | 0.310796768 | 0.382085084 | 0.573824916 | 0.08282216  |
| 101109630 | TEPSIN       | 0.30972318  | 0.383818545 | 0.821837239 | 0.003533803 |
| 105609473 | -            | 0.30972318  | 0.383818545 | 0.821837239 | 0.003533803 |
| 105604792 | LOC105604792 | 0.30972318  | 0.383818545 | 0.821837239 | 0.003533803 |
| 101120736 | LOC101120736 | 0.30972318  | 0.383818545 | 0.821837239 | 0.003533803 |
| 101110552 | C1H1orf56    | 0.30972318  | 0.383818545 | 0.821837239 | 0.003533803 |
| 106990872 | -            | 0.30972318  | 0.383818545 | 0.821837239 | 0.003533803 |
| 101109798 | PALM         | 0.30972318  | 0.383818545 | 0.821837239 | 0.003533803 |
| 106990487 | LOC106990487 | 0.30972318  | 0.383818545 | 0.821837239 | 0.003533803 |
| 101113436 | BCR          | 0.30972318  | 0.383818545 | 0.821837239 | 0.003533803 |
| 101114979 | PPM1F        | 0.30972318  | 0.383818545 | 0.821837239 | 0.003533803 |
| 101116143 | ZBTB7A       | 0.30972318  | 0.383818545 | 0.821837239 | 0.003533803 |
| 101111598 | CALN1        | 0.30972318  | 0.383818545 | 0.821837239 | 0.003533803 |
| 101118415 | LOC101118415 | 0.30972318  | 0.383818545 | 0.821837239 | 0.003533803 |
| 101114594 | OBSL1        | 0.30972318  | 0.383818545 | 0.821837239 | 0.003533803 |
| 443523    | CSF3         | 0.30972318  | 0.383818545 | 0.821837239 | 0.003533803 |
| 101123419 | LOC101123419 | 0.30972318  | 0.383818545 | 0.821837239 | 0.003533803 |
| 101104825 | TSSK6        | 0.30972318  | 0.383818545 | 0.821837239 | 0.003533803 |
| 101102149 | CFAP99       | 0.30972318  | 0.383818545 | 0.821837239 | 0.003533803 |
| 106991366 | LOC106991366 | 0.30972318  | 0.383818545 | 0.821837239 | 0.003533803 |
| 105612738 | ZNF580       | 0.30972318  | 0.383818545 | 0.821837239 | 0.003533803 |

|           |              |              |             |              |             |
|-----------|--------------|--------------|-------------|--------------|-------------|
| 101105210 | KCNC4        | 0.30972318   | 0.383818545 | 0.821837239  | 0.003533803 |
| 101104701 | KLC2         | 0.30972318   | 0.383818545 | 0.821837239  | 0.003533803 |
| 101111922 | LOC101111922 | 0.30972318   | 0.383818545 | 0.821837239  | 0.003533803 |
| 101109548 | RNF112       | 0.30972318   | 0.383818545 | 0.821837239  | 0.003533803 |
| 101106970 | LOC101106970 | 0.30972318   | 0.383818545 | 0.821837239  | 0.003533803 |
| 101108977 | RBP1         | 0.30972318   | 0.383818545 | 0.821837239  | 0.003533803 |
| 105611776 | LOC105611776 | 0.30972318   | 0.383818545 | 0.821837239  | 0.003533803 |
| 101108948 | GDPD5        | 0.396478806  | 0.256660318 | 0.821814157  | 0.00353553  |
| 100302305 | ARF5         | 0.535434357  | 0.110708837 | 0.821251878  | 0.003577786 |
| 101122519 | MKNK2        | 0.430589552  | 0.214153391 | 0.821164427  | 0.00358439  |
| 443061    | BCL2L1       | 0.492060958  | 0.148556367 | 0.82093786   | 0.003601542 |
| 101123660 | P2RY6        | 0.331585995  | 0.349283304 | 0.820796407  | 0.00361228  |
| 106990979 | -            | 0.254879782  | 0.477280986 | 0.820050027  | 0.003669319 |
| 101102535 | AKAP4        | 0.273678956  | 0.444188764 | 0.81917214   | 0.003737232 |
| 101114977 | AACS         | 0.362636557  | 0.30307802  | 0.817761552  | 0.003848236 |
| 101107734 | ICE1         | 0.30165159   | 0.396973379 | 0.817108551  | 0.003900415 |
| 101108179 | MFSD13A      | 0.480741119  | 0.159573615 | 0.816942463  | 0.003913766 |
| 101111832 | LOC101111832 | 0.303194623  | 0.394442009 | 0.816818677  | 0.003923739 |
| 101101948 | MAZ          | 0.465528064  | 0.175133121 | 0.81672562   | 0.003931248 |
| 101117272 | LOC101117272 | -0.309541053 | 0.384112996 | -0.664196483 | 0.036199996 |
| 101104656 | RAD23A       | 0.499099563  | 0.141945748 | 0.81657561   | 0.003943374 |
| 101121114 | EMP3         | 0.266379676  | 0.456911524 | 0.81642527   | 0.003955553 |
| 101112388 | TMEM131      | 0.30915338   | 0.384740126 | 0.6819691    | 0.02983629  |
| 101102719 | LOC101102719 | 0.595123402  | 0.06952292  | 0.816420022  | 0.003955979 |
| 101122755 | SLX1A        | 0.268316835  | 0.453519228 | 0.81628741   | 0.003966746 |
| 101108010 | SNRNP25      | 0.598569155  | 0.067511809 | 0.815673009  | 0.004016902 |
| 443522    | PMCH         | 0.311945521  | 0.380234507 | 0.81528567   | 0.004048755 |
| 101111834 | STOML1       | 0.284784502  | 0.425146743 | 0.815187235  | 0.004056879 |
| 101109417 | LOC101109417 | 0.297386291  | 0.40401112  | 0.814837667  | 0.004085822 |
| 101105758 | MYO5A        | -0.308281903 | 0.386151715 | -0.686462255 | 0.028357609 |
| 105615140 | -            | 0.251428904  | 0.483469452 | 0.814579129  | 0.004107323 |
| 101115396 | EXOSC6       | 0.510880915  | 0.131289778 | 0.813440868  | 0.00420295  |
| 101111324 | NOTCH4       | 0.50363838   | 0.137780009 | 0.813399033  | 0.004206495 |

|           |              |              |             |              |             |
|-----------|--------------|--------------|-------------|--------------|-------------|
| 101116767 | PISD         | 0.451105737  | 0.190684783 | 0.813355499  | 0.004210185 |
| 101106191 | GPR158       | 0.162432616  | 0.653906099 | 0.812716259  | 0.004264649 |
| 101111107 | CHD7         | -0.30529828  | 0.391003517 | -0.523091322 | 0.120781973 |
| 101111754 | NHLRC1       | 0.433001871  | 0.211311945 | 0.812535391  | 0.00428015  |
| 101121861 | HSF2         | -0.304658638 | 0.392047492 | -0.872136064 | 0.000999373 |
| 101105462 | ABAT         | -0.304559203 | 0.392209904 | -0.462048865 | 0.178813317 |
| 101123467 | SH3BP2       | -0.046433646 | 0.898645118 | 0.81229919   | 0.004300454 |
| 105602360 | -            | 0.088497852  | 0.807920002 | 0.811748744  | 0.004348039 |
| 101114642 | TRIM44       | 0.43535274   | 0.208563886 | 0.810996445  | 0.00441368  |
| 101110763 | NDRG2        | 0.482236642  | 0.158090719 | 0.810374987  | 0.004468437 |
| 101114124 | H6PD         | 0.581820083  | 0.077652693 | 0.81009627   | 0.004493152 |
| 101106984 | FCRLB        | 0.337043127  | 0.340917792 | 0.810010762  | 0.004500754 |
| 101110356 | -            | 0.623230686  | 0.054222474 | 0.809334103  | 0.004561236 |
| 101105785 | LOC101105785 | 0.053022727  | 0.884338323 | 0.809212089  | 0.004572203 |
| 101115214 | FAM81A       | -0.302922643 | 0.39488763  | -0.565285734 | 0.088582618 |
| 101116960 | REEP4        | 0.439799859  | 0.203422144 | 0.808962528  | 0.004594694 |
| 101122020 | ATP6V0E2     | 0.17820371   | 0.622324654 | 0.807858832  | 0.004695111 |
| 100302549 | SLC1A5       | 0.347128788  | 0.325729987 | 0.806174154  | 0.004851396 |
| 101113548 | SHC1         | 0.407305632  | 0.24269895  | 0.805928026  | 0.004874535 |
| 101105685 | LOC101105685 | 0.190116051  | 0.598829534 | 0.805881822  | 0.004878888 |
| 105604809 | -            | 0.361849317  | 0.304207256 | 0.805880605  | 0.004879003 |
| 101116157 | ASGR1        | 0.545570663  | 0.102844273 | 0.80555349   | 0.004909899 |
| 106991637 | -            | 0.163119466  | 0.652519908 | 0.805191387  | 0.004944262 |
| 101113105 | POC1A        | 0.469646554  | 0.170835349 | 0.804772632  | 0.004984215 |
| 101111028 | ZC2HC1A      | -0.301085892 | 0.397903368 | -0.868347067 | 0.001117853 |
| 101113048 | STK16        | 0.13422639   | 0.711612906 | 0.804566376  | 0.005003978 |
| 101120923 | LOC101120923 | 0.613349689  | 0.059317464 | 0.804494354  | 0.005010893 |
| 101101836 | -            | 0.102613482  | 0.777881644 | 0.80390166   | 0.005068051 |
| 101101890 | TRIR         | 0.295362822  | 0.40737051  | 0.803655212  | 0.005091955 |
| 101120455 | LOC101120455 | 0.257403706  | 0.472776862 | 0.802743073  | 0.005181126 |
| 101106377 | PDZK1IP1     | 0.299668138  | 0.400238701 | 0.80271449   | 0.005183938 |
| 105603226 | LOC105603226 | 0.374819395  | 0.285887435 | 0.802564748  | 0.005198688 |
| 101107246 | AGPAT3       | 0.49967981   | 0.141408958 | 0.801662091  | 0.005288239 |

|           |              |              |             |              |             |
|-----------|--------------|--------------|-------------|--------------|-------------|
| 105605833 | LOC105605833 | 0.177076736  | 0.624563816 | 0.80162378   | 0.005292064 |
| 106991117 | LOC106991117 | 0.458497961  | 0.182616183 | 0.801240744  | 0.005330414 |
| 554256    | TLR5         | 0.160340664  | 0.658133905 | 0.801102061  | 0.005344348 |
| 101120358 | SLC25A1      | 0.385747439  | 0.27092612  | 0.800509117  | 0.005404216 |
| 105611280 | LOC105611280 | 0.518463882  | 0.124700283 | 0.800204264  | 0.005435181 |
| 101102503 | CACNA1E      | 0.326713023  | 0.356840127 | 0.799988653  | 0.005457158 |
| 101118057 | -            | 0.515348903  | 0.12738176  | 0.798991086  | 0.005559664 |
| 101116029 | CRYBG2       | 0.365676588  | 0.298738229 | 0.798502516  | 0.005610365 |
| 101113116 | NEURL1       | 0.303830116  | 0.393401743 | 0.798475762  | 0.005613151 |
| 101105541 | ECM1         | 0.451851653  | 0.189861308 | 0.798361038  | 0.005625108 |
| 101104157 | -            | 0.513588467  | 0.128912851 | 0.798215342  | 0.005640319 |
| 101101932 | FZD4         | 0.295510133  | 0.407125496 | 0.591242628  | 0.071834258 |
| 101110159 | CHMP6        | 0.166174921  | 0.646365078 | 0.798010279  | 0.005661778 |
| 101122041 | MRC2         | 0.249562116  | 0.48683156  | 0.797913197  | 0.005671958 |
| 105603854 | -            | 0.524845469  | 0.119316933 | 0.79785454   | 0.005678115 |
| 101114323 | PARP14       | -0.295184012 | 0.407668009 | -0.750531093 | 0.012380854 |
| 101112958 | HPGD         | 0.292950329  | 0.411393039 | 0.797544721  | 0.005710713 |
| 101103349 | TRIM2        | 0.490430956  | 0.150113437 | 0.796487736  | 0.00582293  |
| 101114310 | LOC101114310 | 0.152031358  | 0.675012225 | 0.796468539  | 0.005824983 |
| 105605818 | LOC105605818 | 0.581580893  | 0.077804232 | 0.795110599  | 0.005971481 |
| 101108719 | PAX5         | 0.632844343  | 0.049552076 | 0.795011732  | 0.005982248 |
| 101123476 | ATP6V0A1     | 0.132296889  | 0.71561279  | 0.794539706  | 0.006033846 |
| 101111957 | CACFD1       | 0.218248262  | 0.54467991  | 0.794158961  | 0.006075696 |
| 101112689 | KAZALD1      | 0.346161371  | 0.327171334 | 0.793553414  | 0.00614268  |
| 101116992 | LIPC         | 0.292852815  | 0.411556026 | 0.648221616  | 0.042652267 |
| 105613348 | LOC105613348 | 0.454211692  | 0.187269642 | 0.793258338  | 0.00617551  |
| 101121302 | MARK2        | 0.225957955  | 0.530189875 | 0.792289458  | 0.006284185 |
| 101117681 | SCRN2        | 0.308471966  | 0.385843643 | 0.791898574  | 0.006328411 |
| 101115920 | SELENBP1     | 0.402698602  | 0.248586651 | 0.791810015  | 0.006338461 |
| 101118975 | SMOX         | 0.405195539  | 0.245385823 | 0.791777325  | 0.006342174 |
| 105604623 | -            | -0.045185558 | 0.901358157 | 0.790921063  | 0.006439978 |
| 105612542 | LOC105612542 | 0.501461225  | 0.139768727 | 0.790408511  | 0.006499033 |
| 101120483 | NINJ2        | 0.289885086  | 0.416530914 | 0.66041567   | 0.037662988 |

|           |              |              |             |              |             |
|-----------|--------------|--------------|-------------|--------------|-------------|
| 101119929 | ZNF584       | 0.335582443  | 0.343146837 | 0.790194615  | 0.006523791 |
| 101102434 | ME3          | 0.463266724  | 0.177519937 | 0.790160652  | 0.006527729 |
| 101109427 | ASXL2        | -0.28880683  | 0.418345396 | -0.797508225 | 0.005714562 |
| 101106393 | ALAD         | 0.165338901  | 0.648047236 | 0.789692377  | 0.006582187 |
| 101119773 | LOC101119773 | -0.286744388 | 0.421826369 | -0.357766342 | 0.310099594 |
| 101103461 | LOC101103461 | 0.067225063  | 0.853607947 | 0.789346913  | 0.00662257  |
| 101111742 | TIMM8B       | 0.682960858  | 0.029505489 | 0.789106443  | 0.006650783 |
| 101117867 | SAE1         | 0.667285672  | 0.03503354  | 0.789010974  | 0.006662008 |
| 101103449 | -            | 0.287803169  | 0.420037679 | 0.788924293  | 0.006672211 |
| 106991310 | -            | 0.563219318  | 0.090014119 | 0.788760126  | 0.006691565 |
| 105615960 | LOC105615960 | 0.83486254   | 0.002652145 | 0.788200967  | 0.006757785 |
| 101103093 | ISCU         | 0.362592638  | 0.30314096  | 0.787248893  | 0.006871605 |
| 101107390 | RPP25        | 0.173050077  | 0.632586819 | 0.786596712  | 0.006950354 |
| 101120299 | COLEC11      | 0.283380989  | 0.427531983 | 0.64578518   | 0.043699637 |
| 780507    | FGFR1        | 0.281368588  | 0.430962822 | 0.669044165  | 0.03438105  |
| 101121949 | LOC101121949 | 0.266032622  | 0.457520471 | 0.786207544  | 0.006997649 |
| 105609948 | LOC105609948 | 0.280198753  | 0.432963045 | 0.619688011  | 0.056014476 |
| 101111275 | GRB10        | 0.27986318   | 0.433537609 | 0.6931204    | 0.0262597   |
| 101114545 | WFDC3        | 0.42403774   | 0.221980793 | 0.786177634  | 0.007001293 |
| 101106801 | PLXND1       | 0.42403774   | 0.221980793 | 0.786177634  | 0.007001293 |
| 101105192 | TREML1       | 0.278689464  | 0.435549991 | 0.666715841  | 0.035246762 |
| 105605623 | -            | 0.42403774   | 0.221980793 | 0.786177634  | 0.007001293 |
| 105614828 | -            | 0.277470769  | 0.437644027 | 0.344016024  | 0.330379417 |
| 106991509 | -            | 0.42403774   | 0.221980793 | 0.786177634  | 0.007001293 |
| 101120987 | LZTS1        | 0.42403774   | 0.221980793 | 0.786177634  | 0.007001293 |
| 105615065 | -            | 0.42403774   | 0.221980793 | 0.786177634  | 0.007001293 |
| 105603595 | LOC105603595 | 0.42403774   | 0.221980793 | 0.786177634  | 0.007001293 |
| 101108705 | LOC101108705 | 0.42403774   | 0.221980793 | 0.786177634  | 0.007001293 |
| 105602874 | -            | 0.42403774   | 0.221980793 | 0.786177634  | 0.007001293 |
| 105614872 | CHADL        | 0.42403774   | 0.221980793 | 0.786177634  | 0.007001293 |
| 105602321 | LOC105602321 | 0.42403774   | 0.221980793 | 0.786177634  | 0.007001293 |
| 101123155 | MON1A        | 0.250840063  | 0.484528875 | 0.785822039  | 0.007044723 |
| 105604156 | LOC105604156 | 0.30919528   | 0.384672321 | 0.784654423  | 0.007188672 |

|           |              |              |             |              |             |
|-----------|--------------|--------------|-------------|--------------|-------------|
| 101119179 | SLC44A3      | 0.273735458  | 0.444090916 | 0.52437666   | 0.119707385 |
| 101106228 | ZCWPW1       | 0.308928841  | 0.385103586 | 0.784219778  | 0.007242786 |
| 105608780 | -            | 0.713265894  | 0.020563395 | 0.783623696  | 0.007317468 |
| 101116984 | -            | 0.272590522  | 0.446075604 | 0.3780043    | 0.281482059 |
| 101102995 | SHBG         | 0.368661793  | 0.294509096 | 0.783580714  | 0.007322874 |
| 101110433 | CUBN         | 0.488256059  | 0.152206383 | 0.783140719  | 0.007378378 |
| 101103488 | LOC101103488 | 0.225840621  | 0.530409222 | 0.783094215  | 0.007384262 |
| 100302349 | POU5F1       | 0.188505627  | 0.601986991 | 0.782353     | 0.007478491 |
| 101110945 | PDCD7        | -0.270452627 | 0.449792285 | -0.641421333 | 0.045618378 |
| 106990181 | -            | 0.137252625  | 0.705352249 | 0.78195385   | 0.007529585 |
| 101120752 | TMEM260      | -0.268598426 | 0.45302706  | -0.763631409 | 0.010151499 |
| 101109258 | C3H12orf50   | 0.621571644  | 0.055056872 | 0.780327792  | 0.007740291 |
| 101110092 | CPEB1        | 0.621571644  | 0.055056872 | 0.780327792  | 0.007740291 |
| 101123372 | LOC101123372 | 0.488109158  | 0.152348382 | 0.780007202  | 0.007782321 |
| 101106861 | MRPL27       | 0.311557171  | 0.380859625 | 0.779611257  | 0.007834452 |
| 101112641 | ZBED4        | 0.334197633  | 0.345266931 | 0.778593026  | 0.007969651 |
| 101103220 | -            | 0.304120486  | 0.392926866 | 0.778212669  | 0.008020575 |
| 101102666 | TULP2        | 0.348897329  | 0.32310358  | 0.776745714  | 0.008219136 |
| 497274    | CRYAB        | 0.267501009  | 0.454946494 | 0.573288023  | 0.083177028 |
| 101110931 | VWF          | 0.347333171  | 0.325425901 | 0.776206867  | 0.008292937 |
| 101118332 | PLAT         | 0.295825661  | 0.40660093  | 0.775844365  | 0.008342849 |
| 101115175 | PGP          | 0.600661538  | 0.066309353 | 0.775471435  | 0.008394417 |
| 101110941 | LOC101110941 | -0.266409438 | 0.45685932  | -0.613807238 | 0.059074837 |
| 101119755 | SERGEF       | 0.111918658  | 0.758221547 | 0.775408221  | 0.008403181 |
| 101108095 | LRR58        | 0.259880542  | 0.468375012 | 0.775008649  | 0.008458724 |
| 101102949 | COLEC12      | 0.681828677  | 0.029883332 | 0.774917837  | 0.008471384 |
| 101103995 | MIEN1        | 0.295265325  | 0.40753271  | 0.773954174  | 0.008606549 |
| 106991842 | -            | 0.400271442  | 0.251720201 | 0.773329305  | 0.008695004 |
| 101117928 | HTR4         | 0.264219039  | 0.460708523 | 0.536799648  | 0.109628221 |
| 106991655 | -            | 0.38729277   | 0.268845709 | 0.772984632  | 0.008744069 |
| 105605032 | LOC105605032 | 0.263325595  | 0.462282717 | 0.64844718   | 0.042556162 |
| 101104397 | GPX3         | 0.3922448    | 0.262238146 | 0.772931414  | 0.008751663 |
| 101105117 | TARS2        | 0.537286397  | 0.109244572 | 0.772310285  | 0.00884063  |

|           |              |              |             |              |             |
|-----------|--------------|--------------|-------------|--------------|-------------|
| 101117638 | LOC101117638 | -0.263001904 | 0.462853631 | -0.535093478 | 0.110979679 |
| 101113914 | VSIG1        | 0.262947464  | 0.462949681 | 0.299990832  | 0.399706582 |
| 101106615 | FXVD3        | 0.311241813  | 0.381367619 | 0.771349332  | 0.008979527 |
| 101123118 | LOC101123118 | 0.28890791   | 0.418175142 | 0.771218138  | 0.008998609 |
| 105616808 | -            | 0.105092447  | 0.77263249  | 0.771098859  | 0.009015982 |
| 101117219 | RUSC2        | 0.523973575  | 0.120043735 | 0.771092205  | 0.009016952 |
| 105603274 | -            | 0.262291486  | 0.464107738 | 0.697604269  | 0.024908403 |
| 443047    | AQP3         | 0.210678508  | 0.559057204 | 0.770738323  | 0.00906864  |
| 105613005 | -            | 0.261959592  | 0.46469415  | 0.437259304  | 0.206350432 |
| 101101926 | VOPP1        | 0.467167209  | 0.173415009 | 0.769872616  | 0.009195966 |
| 101110235 | MLLT1        | 0.490041443  | 0.150486981 | 0.769438929  | 0.009260223 |
| 105608396 | -            | 0.261110047  | 0.466196677 | 0.606863085  | 0.062828033 |
| 100302063 | RAB8A        | 0.260931351  | 0.466512997 | 0.615731402  | 0.05806166  |
| 101114004 | SLC4A8       | -0.260854088 | 0.466649793 | -0.60737754  | 0.062544751 |
| 101113630 | PHF1         | 0.333295407  | 0.346651778 | 0.769299172  | 0.009280998 |
| 101103364 | SERPINB5     | 0.356861933  | 0.311412852 | 0.767750529  | 0.009513405 |
| 101102363 | POP7         | 0.604849462  | 0.063944925 | 0.767708935  | 0.009519703 |
| 101114733 | -            | 0.393599909  | 0.260445742 | 0.7672648    | 0.009587136 |
| 101113185 | ACKR1        | 0.435568045  | 0.208313241 | 0.766986406  | 0.009629576 |
| 101118156 | LOC101118156 | 0.038083586  | 0.916812876 | 0.766851243  | 0.009650229 |
| 101114928 | ZNF488       | 0.195544088  | 0.588231662 | 0.7667971    | 0.009658511 |
| 101109659 | ROR1         | 0.573062823  | 0.083326169 | 0.766081579  | 0.009768428 |
| 105608589 | LOC105608589 | 0.319368626  | 0.36838284  | 0.765960025  | 0.009787188 |
| 101111280 | KDM3B        | -0.257888101 | 0.471914566 | -0.740848634 | 0.014234462 |
| 101101911 | CTSZ         | 0.349519786  | 0.322181815 | 0.765898138  | 0.009796749 |
| 105608992 | MSANTD3      | 0.257544138  | 0.472526801 | 0.596860188  | 0.068504428 |
| 101111652 | CDH3         | 0.607775905  | 0.06232597  | 0.765734172  | 0.009822113 |
| 101102757 | LMO1         | -0.037727584 | 0.917588279 | 0.765409475  | 0.009872476 |
| 101112155 | LOC101112155 | 0.520454315  | 0.123005344 | 0.765228059  | 0.009900694 |
| 494434    | UCP1         | 0.451080024  | 0.190713207 | 0.764811824  | 0.009965651 |
| 101105290 | LOC101105290 | 0.510534115  | 0.131596167 | 0.764538793  | 0.010008423 |
| 101103184 | CARD6        | -0.254955748 | 0.477145146 | -0.6766881   | 0.031640411 |
| 101104226 | C3AR1        | 0.592655738  | 0.070986924 | 0.764221182  | 0.010058341 |

|           |              |              |             |              |             |
|-----------|--------------|--------------|-------------|--------------|-------------|
| 100270719 | UQCRH        | 0.629435113  | 0.051176379 | 0.764009676  | 0.01009168  |
| 105602135 | -            | 0.254255459  | 0.478398015 | 0.570819497  | 0.084821235 |
| 101115498 | AS3MT        | -0.253333406 | 0.480049818 | -0.762010429 | 0.010410667 |
| 101110647 | LOC101110647 | 0.252455326  | 0.481625148 | -0.584082871 | 0.076228544 |
| 105604727 | LOC105604727 | 0.25209469   | 0.482272801 | 0.574367367  | 0.08246461  |
| 100217407 | TIMP3        | 0.446910782  | 0.195354852 | 0.763696381  | 0.010141206 |
| 101111014 | -            | 0.351790686  | 0.318830577 | 0.763486774  | 0.010174437 |
| 101102095 | JAGN1        | 0.452595788  | 0.189041881 | 0.763418174  | 0.010185329 |
| 105607129 | AOPEP        | 0.434688146  | 0.209338664 | 0.762303593  | 0.010363454 |
| 101108988 | ERAS         | 0.382504831  | 0.275319962 | 0.762125952  | 0.010392045 |
| 105602955 | LOC105602955 | 0.159804064  | 0.65921978  | 0.761854743  | 0.010435801 |
| 101111441 | ESYT1        | 0.378796799  | 0.280391612 | 0.761433736  | 0.010503983 |
| 101118646 | LY6G6C       | 0.425285332  | 0.220477907 | 0.760780837  | 0.010610339 |
| 101103777 | ZNF668       | 0.534488796  | 0.111461147 | 0.760088402  | 0.01072396  |
| 101113262 | LRR36        | 0.248053899  | 0.489555213 | 0.435048752  | 0.208918066 |
| 100135685 | ASRGL1       | 0.575623562  | 0.081640426 | 0.760025626  | 0.010734303 |
| 101110167 | SPINT2       | 0.311277561  | 0.381310018 | 0.759857362  | 0.010762061 |
| 101122618 | NNAT         | 0.438504271  | 0.204912434 | 0.759404379  | 0.010837039 |
| 101106327 | NDFIP1       | -0.247353765 | 0.490821785 | -0.607676704 | 0.062380404 |
| 101118655 | DSG2         | 0.247189089  | 0.491119896 | 0.431639852  | 0.212913571 |
| 101104217 | -            | 0.446048563  | 0.196322914 | 0.759062662  | 0.010893842 |
| 105602228 | LOC105602228 | 0.155055456  | 0.668853952 | 0.759043972  | 0.010896955 |
| 101116710 | SIGMAR1      | 0.399048604  | 0.253307199 | 0.758772408  | 0.010942255 |
| 443408    | LPL          | 0.713142934  | 0.0205953   | 0.758682618  | 0.010957262 |
| 101107537 | PTGES3L      | 0.244939948  | 0.495199222 | 0.629969253  | 0.050919586 |
| 101116073 | ATF3         | -0.243606082 | 0.497625284 | -0.643762892 | 0.044581955 |
| 101123297 | BRD4         | 0.512317581  | 0.130025207 | 0.758568728  | 0.010976317 |
| 101117390 | ALOX5        | 0.267164078  | 0.455536534 | 0.758430281  | 0.010999513 |
| 101106977 | LOC101106977 | 0.241819859  | 0.500881983 | 0.662444935  | 0.036872893 |
| 101111729 | KCNK2        | 0.504887253  | 0.136647108 | 0.757808386  | 0.011104133 |
| 101111482 | VPS9D1       | 0.241426462  | 0.501600443 | 0.696907409  | 0.025115209 |
| 101116914 | JMJD7        | 0.554159926  | 0.096464257 | 0.75742223   | 0.011169446 |
| 101103834 | FTL          | 0.219868558  | 0.541621672 | 0.757189841  | 0.011208881 |



|           |              |              |             |              |             |
|-----------|--------------|--------------|-------------|--------------|-------------|
| 101105696 | PPP1R10      | 0.403463151  | 0.247604116 | 0.756377712  | 0.011347463 |
| 101117395 | LOC101117395 | 0.240210096  | 0.503824644 | -0.602506792 | 0.065260622 |
| 101112604 | DUSP7        | 0.546586356  | 0.102076297 | 0.756021779  | 0.011408577 |
| 101116493 | SRGAP2       | 0.532274178  | 0.113235679 | 0.755789765  | 0.011448538 |
| 101123651 | MTARC1       | 0.610554239  | 0.060814094 | 0.755380343  | 0.011519295 |
| 101104401 | LOC101104401 | 0.238994079  | 0.506052347 | 0.492011502  | 0.148603466 |
| 105608949 | LOC105608949 | 0.14647735   | 0.686367537 | 0.754995944  | 0.011586006 |
| 101105426 | GPRC5C       | 0.148844381  | 0.681521024 | 0.754372618  | 0.011694758 |
| 101108423 | LOC101108423 | 0.517962602  | 0.125129415 | 0.754034839  | 0.011753989 |
| 101116540 | IDS          | -0.237515394 | 0.508766803 | -0.590563602 | 0.072243749 |
| 101109777 | TMBIM1       | 0.065850804  | 0.856574384 | 0.753961418  | 0.011766891 |
| 101115699 | DUSP2        | 0.218971059  | 0.543314817 | 0.753588186  | 0.011832634 |
| 101123091 | NUDT2        | 0.126455962  | 0.727758801 | 0.753065948  | 0.011925054 |
| 101106017 | MYO5C        | -0.234884201 | 0.513611935 | -0.395377033 | 0.258105409 |
| 105605297 | LOC105605297 | 0.192665646  | 0.593843016 | 0.752895117  | 0.011955396 |
| 105607815 | LOC105607815 | 0.597644024  | 0.068047977 | 0.752555041  | 0.012015959 |
| 101110988 | KCNAB1       | 0.234673397  | 0.514000939 | 0.575294372  | 0.08185589  |
| 101115412 | FLI1         | -0.233560663 | 0.516056335 | -0.838014756 | 0.002465264 |
| 101122992 | TRPT1        | 0.351759826  | 0.318875996 | 0.752360269  | 0.012050742 |
| 101111588 | PTPRF        | 0.20699302   | 0.566109712 | 0.752216415  | 0.012076477 |
| 101119661 | DIDO1        | -0.231793078 | 0.519328317 | -0.700185627 | 0.024152521 |
| 101107544 | HCST         | 0.200573388  | 0.578474686 | 0.751968901  | 0.012120847 |
| 101117116 | TXNRD3       | 0.569313415  | 0.085834575 | 0.749845457  | 0.012506207 |
| 105611737 | LOC105611737 | -0.231003693 | 0.5207923   | -0.491735869 | 0.148866124 |
| 101118623 | KCNRG        | 0.468726156  | 0.171790299 | 0.749118199  | 0.012640138 |
| 101104240 | TMOD2        | 0.765173107  | 0.009909253 | 0.748866911  | 0.012686648 |
| 101122536 | EFCAB5       | 0.229056043  | 0.524411623 | 0.531108137  | 0.114177076 |
| 101113571 | LOC101113571 | -0.228995757 | 0.524523816 | -0.592733879 | 0.07094026  |
| 101105535 | TMEM43       | 0.571883031  | 0.084110309 | 0.748665018  | 0.012724102 |
| 105609643 | GATAD1       | 0.228856404  | 0.524783192 | 0.47111722   | 0.169316058 |
| 101120219 | LOC101120219 | 0.369594047  | 0.293194965 | 0.747190052  | 0.013000083 |
| 101122943 | TAB1         | 0.580490961  | 0.078497185 | 0.745867502  | 0.013251084 |
| 101110591 | SEC24D       | -0.2260355   | 0.530044932 | -0.566921526 | 0.087459834 |

|           |              |              |             |              |             |
|-----------|--------------|--------------|-------------|--------------|-------------|
| 105602998 | -            | 0.096392454  | 0.791089802 | 0.745649088  | 0.013292859 |
| 105605986 | -            | 0.520707798  | 0.122790526 | 0.744686931  | 0.013477986 |
| 105605723 | -            | 0.101479288  | 0.780285988 | 0.743864618  | 0.013637628 |
| 101119100 | ZCCHC2       | -0.225171077 | 0.531661577 | -0.343904567 | 0.330546529 |
| 105603614 | AMIGO3       | -0.224552097 | 0.532820416 | -0.482368288 | 0.157960584 |
| 101115782 | PMPCA        | 0.224393004  | 0.533118431 | 0.661095333  | 0.0373971   |
| 101123423 | DNAJC4       | 0.361108942  | 0.305271297 | 0.743589071  | 0.013691416 |
| 101111630 | SH3RF2       | 0.223405133  | 0.534970427 | -0.509099295 | 0.13286848  |
| 101112079 | FBXO2        | 0.480594423  | 0.159719522 | 0.743114922  | 0.01378432  |
| 101102637 | SLC39A5      | 0.448337496  | 0.193759132 | 0.74248633   | 0.013908162 |
| 101117200 | RNF123       | 0.222925229  | 0.53587105  | 0.616131719  | 0.057852323 |
| 106991594 | LOC106991594 | 0.408452523  | 0.241245508 | 0.74238893   | 0.013927421 |
| 101110592 | C6H4orf19    | 0.222008229  | 0.537593655 | 0.470835671  | 0.169606288 |
| 101120881 | RMC1         | 0.797532683  | 0.005711982 | 0.742232169  | 0.013958456 |
| 101115246 | TRIM8        | 0.449255187  | 0.192736775 | 0.742115613  | 0.013981562 |
| 101112559 | LOC101112559 | 0.525417531  | 0.118841561 | 0.74172524   | 0.014059147 |
| 105614926 | SYNGR1       | 0.53349064   | 0.112258775 | 0.741719671  | 0.014060256 |
| 101108903 | CNPY2        | 0.179866293  | 0.619026393 | 0.741344978  | 0.01413501  |
| 101113728 | LOC101113728 | 0.32725562   | 0.355994657 | 0.739918292  | 0.014422188 |
| 101105467 | SETD1A       | 0.18190134   | 0.614997551 | 0.739745988  | 0.014457144 |
| 106991487 | LOC106991487 | -0.219389831 | 0.542524535 | -0.7080802   | 0.021938833 |
| 101120918 | LOC101120918 | 0.663650487  | 0.036408854 | 0.739737702  | 0.014458826 |
| 101101915 | DHX34        | 0.395687032  | 0.25769836  | 0.739136923  | 0.014581183 |
| 101109893 | GRB2         | 0.195744261  | 0.587842164 | 0.738303883  | 0.014752035 |
| 101110294 | LRRC71       | 0.006702299  | 0.985339381 | 0.737991728  | 0.014816414 |
| 101103693 | GNAI3        | -0.215973633 | 0.548984673 | -0.711183041 | 0.021108467 |
| 105602959 | LOC105602959 | 0.302556509  | 0.3954879   | 0.737410595  | 0.01493679  |
| 106990491 | LOC106990491 | -0.212167467 | 0.556217649 | -0.491711995 | 0.148888888 |
| 101120889 | LOC101120889 | -0.211879287 | 0.556766791 | -0.703949795 | 0.023078756 |
| 105607844 | LOC105607844 | 0.145631922  | 0.688101066 | 0.737406455  | 0.01493765  |
| 105606871 | LOC105606871 | 0.210545293  | 0.559311528 | 0.655421705  | 0.039655867 |
| 101122352 | GIPC1        | 0.044229165  | 0.903437745 | 0.737307902  | 0.014958132 |
| 101114901 | FOXR1        | 0.671354621  | 0.033536341 | 0.737036469  | 0.015014646 |

|           |              |              |             |              |             |
|-----------|--------------|--------------|-------------|--------------|-------------|
| 105609911 | PTRHD1       | 0.83478936   | 0.002656601 | 0.736823055  | 0.015059184 |
| 101109667 | GTF3C1       | 0.210355687  | 0.559673586 | 0.735778498  | 0.015278506 |
| 105602665 | -            | 0.276433819  | 0.439429406 | 0.735319952  | 0.015375485 |
| 101111402 | SRF          | 0.262522949  | 0.46369897  | 0.734276773  | 0.015597705 |
| 101117231 | -            | 0.162341282  | 0.6540905   | 0.733899113  | 0.015678703 |
| 101121036 | LOC101121036 | 0.131894343  | 0.716448062 | 0.73349834   | 0.015764979 |
| 105611619 | CENPV        | 0.294827071  | 0.408262187 | 0.733238365  | 0.015821121 |
| 101122165 | CCDC171      | -0.205740809 | 0.56851365  | -0.626467567 | 0.052618731 |
| 101115850 | LGALS8       | -0.204731153 | 0.570454768 | -0.609013794 | 0.061649337 |
| 101112898 | RBM27        | -0.20106638  | 0.577521549 | -0.61870281  | 0.056519693 |
| 101111287 | SPINT1       | 0.247125493  | 0.491235042 | 0.732172178  | 0.016052822 |
| 106991991 | LOC106991991 | 0.200411613  | 0.578787585 | 0.351580227  | 0.31914039  |
| 101123215 | CDH24        | 0.554650912  | 0.096107371 | 0.731514933  | 0.016196823 |
| 101121909 | NYAP1        | 0.468613711  | 0.171907183 | 0.731099344  | 0.01628834  |
| 101105254 | ZNF410       | -0.196500668 | 0.586371207 | -0.592284496 | 0.071208896 |
| 101120347 | ANGPTL1      | 0.468613711  | 0.171907183 | 0.731099344  | 0.01628834  |
| 101104172 | LOC101104172 | 0.468613711  | 0.171907183 | 0.731099344  | 0.01628834  |
| 101111582 | SCN5A        | 0.468613711  | 0.171907183 | 0.731099344  | 0.01628834  |
| 101102994 | LOC101102994 | 0.19553322   | 0.588252811 | 0.444130896  | 0.198486001 |
| 101102354 | NIT1         | 0.194493605  | 0.59027725  | 0.586984389  | 0.074427314 |
| 101111870 | KANSL3       | -0.194189221 | 0.59087046  | -0.568404674 | 0.086449749 |
| 105606111 | LOC105606111 | 0.468613711  | 0.171907183 | 0.731099344  | 0.01628834  |
| 101108448 | FBXL18       | 0.468613711  | 0.171907183 | 0.731099344  | 0.01628834  |
| 101120708 | LRRC42       | -0.192537821 | 0.594092656 | -0.451071218 | 0.190722942 |
| 101120828 | SPPL2B       | 0.468613711  | 0.171907183 | 0.731099344  | 0.01628834  |
| 443345    | GJB2         | 0.468613711  | 0.171907183 | 0.731099344  | 0.01628834  |
| 101119597 | LOC101119597 | -0.190430031 | 0.598214634 | -0.609627123 | 0.061315886 |
| 105609173 | -            | 0.468613711  | 0.171907183 | 0.731099344  | 0.01628834  |
| 101120765 | KLHL21       | 0.468613711  | 0.171907183 | 0.731099344  | 0.01628834  |
| 106991534 | -            | 0.468613711  | 0.171907183 | 0.731099344  | 0.01628834  |
| 101101814 | -            | 0.468613711  | 0.171907183 | 0.731099344  | 0.01628834  |
| 101114396 | RBM15B       | 0.183547072  | 0.611746205 | 0.681123625  | 0.030120287 |
| 101112000 | LOC101112000 | 0.468613711  | 0.171907183 | 0.731099344  | 0.01628834  |

|           |              |              |             |              |             |
|-----------|--------------|--------------|-------------|--------------|-------------|
| 678671    | CCR10        | 0.468613711  | 0.171907183 | 0.731099344  | 0.01628834  |
| 101111886 | IFT43        | 0.347447116  | 0.325256434 | 0.730990498  | 0.016312369 |
| 101111283 | CATSPERD     | 0.240921632  | 0.502523054 | 0.730775457  | 0.016359913 |
| 105614894 | NSMF         | 0.179497272  | 0.619757938 | 0.606582119  | 0.062983101 |
| 105612560 | LOC105612560 | 0.179497272  | 0.619757938 | 0.606582119  | 0.062983101 |
| 105603577 | -            | 0.179353749  | 0.620042538 | -0.593860119 | 0.07026991  |
| 101112751 | DYNLRB1      | 0.522310418  | 0.121437758 | 0.730691587  | 0.016378482 |
| 105616126 | LOC105616126 | 0.177813019  | 0.623100595 | 0.662654791  | 0.03679183  |
| 105612581 | LOC105612581 | 0.054412629  | 0.881324159 | 0.730558166  | 0.016408052 |
| 106991531 | -            | 0.248231813  | 0.489233581 | 0.72977313   | 0.016582792 |
| 101113129 | WNT10A       | 0.175456563  | 0.627787753 | -0.391803282 | 0.262823603 |
| 101121769 | LOC101121769 | 0.174624227  | 0.629446205 | 0.55494012   | 0.095897546 |
| 101118974 | TP73         | -0.174407629 | 0.629878028 | -0.363205479 | 0.30226333  |
| 101112370 | NDUFB10      | 0.33979072   | 0.336744993 | 0.728653872  | 0.016834158 |
| 101104075 | WFIKKN2      | 0.41473244   | 0.233373897 | 0.728379921  | 0.016896084 |
| 106991083 | -            | 0.375608145  | 0.284792993 | 0.728278535  | 0.016919042 |
| 100302338 | EIF6         | 0.2083602    | 0.563489522 | 0.728213841  | 0.016933702 |
| 100037663 | GSTM3        | 0.165734704  | 0.64725066  | 0.426088762  | 0.219513158 |
| 101116661 | LOC101116661 | 0.413757039  | 0.234586877 | 0.727645714  | 0.017062829 |
| 101122475 | LOC101122475 | 0.163657175  | 0.651435378 | 0.683601444  | 0.029293156 |
| 101109844 | CNNM2        | -0.003612403 | 0.992097971 | 0.727615212  | 0.017069781 |
| 101123619 | ATF7         | 0.163267787  | 0.652220694 | 0.646663483  | 0.043320109 |
| 101111499 | AQP11        | 0.300669575  | 0.398588448 | 0.726969612  | 0.017217386 |
| 101119664 | IRF2BP1      | 0.113211856  | 0.755498854 | 0.726418428  | 0.017344104 |
| 101123666 | FHDC1        | 0.312463354  | 0.379401745 | 0.725454381  | 0.017567294 |
| 101108788 | CLCF1        | 0.161919048  | 0.654943198 | 0.598279825  | 0.067679195 |
| 105612547 | LOC105612547 | 0.161406604  | 0.655978557 | 0.417696987  | 0.229709074 |
| 101110076 | PRG4         | 0.496337135  | 0.144518345 | 0.725373525  | 0.017586104 |
| 101105355 | SLC37A4      | 0.586803903  | 0.074538544 | 0.724835572  | 0.017711603 |
| 105602840 | LOC105602840 | -0.15953771  | 0.659758993 | -0.590086222 | 0.072532544 |
| 105603608 | -            | 0.159284257  | 0.660272219 | 0.561135799  | 0.091472367 |
| 101107427 | CD207        | 0.159284257  | 0.660272219 | 0.561135799  | 0.091472367 |
| 101106270 | ARHGAP39     | 0.159284257  | 0.660272219 | 0.561135799  | 0.091472367 |

|           |              |              |             |              |             |
|-----------|--------------|--------------|-------------|--------------|-------------|
| 105608892 | -            | 0.159284257  | 0.660272219 | 0.561135799  | 0.091472367 |
| 101105165 | CNKS3        | 0.158891157  | 0.661068473 | 0.437947824  | 0.205554438 |
| 101116612 | HSD17B8      | 0.07971997   | 0.826716626 | 0.723874235  | 0.017937419 |
| 106990184 | LOC106990184 | 0.490671238  | 0.149883286 | 0.723638703  | 0.017993048 |
| 101105123 | LOC101105123 | -0.155734535 | 0.667473503 | -0.730312271 | 0.016462647 |
| 101112692 | YBEY         | 0.228511144  | 0.525426045 | 0.723389677  | 0.018051995 |
| 101116330 | PELP1        | 0.085557071  | 0.814207885 | 0.72277346   | 0.018198433 |
| 105606707 | LOC105606707 | 0.526037587  | 0.118327643 | 0.72246342   | 0.018272422 |
| 101103380 | LOC101103380 | 0.152982201  | 0.673074036 | 0.455915915  | 0.185411163 |
| 101107232 | LOC101107232 | 0.448704544  | 0.193349841 | 0.722381762  | 0.018291944 |
| 101108855 | LYPD5        | 0.382347279  | 0.275534431 | 0.721945662  | 0.018396445 |
| 105611808 | -            | 0.151849886  | 0.675382331 | 0.486099815  | 0.154298736 |
| 101115479 | CADM1        | -0.150393425 | 0.678355    | -0.610975387 | 0.060587047 |
| 101109377 | LOC101109377 | 0.149454963  | 0.680272546 | 0.572210774  | 0.083892003 |
| 101115053 | UBE2C        | 0.38480205   | 0.272203175 | 0.720292753  | 0.018796287 |
| 678676    | CAPNS1       | 0.148292867  | 0.682649323 | 0.664710549  | 0.036004093 |
| 780456    | ACSS1        | 0.606289193  | 0.063145037 | 0.720031994  | 0.01885991  |
| 101120526 | GLRX5        | 0.509576192  | 0.132444759 | 0.719989365  | 0.018870325 |
| 105606990 | -            | 0.145503247  | 0.688365027 | 0.546176848  | 0.102385492 |
| 101108219 | LOC101108219 | 0.144809031  | 0.689789639 | 0.341623093  | 0.333976784 |
| 101118757 | LOC101118757 | 0.144714756  | 0.68998317  | 0.374361702  | 0.28652355  |
| 101101946 | TMEM265      | 0.241466276  | 0.501527712 | 0.71912849   | 0.019081511 |
| 101104787 | LOC101104787 | -0.143627838 | 0.692215603 | -0.629762058 | 0.051019095 |
| 101117658 | TMEM52B      | -0.140268564 | 0.699128691 | 0.479284196  | 0.161026259 |
| 105608454 | LOC105608454 | 0.139861937  | 0.699966857 | 0.514682792  | 0.127959761 |
| 105616290 | LOC105616290 | 0.176540379  | 0.625630467 | 0.718959324  | 0.019123202 |
| 101114114 | RRAGD        | -0.135454323 | 0.709070672 | -0.596481404 | 0.06872572  |
| 101119115 | -            | -0.135136196 | 0.709729055 | 0.422029232  | 0.224412542 |
| 101119713 | -            | -0.134394656 | 0.711264387 | 0.588028622  | 0.073785892 |
| 101108377 | EMG1         | 0.585832757  | 0.075138891 | 0.71696484   | 0.019619502 |
| 105601981 | LOC105601981 | 0.668388436  | 0.034623388 | 0.715519046  | 0.019984791 |
| 101115653 | LOC101115653 | 0.131973047  | 0.716284732 | 0.60769788   | 0.062368782 |
| 106991621 | P2RY2        | 0.600513411  | 0.066394014 | 0.715135227  | 0.020082549 |

|           |              |              |             |              |             |
|-----------|--------------|--------------|-------------|--------------|-------------|
| 101103515 | DAG1         | 0.129962055  | 0.720461269 | 0.63112997   | 0.05036452  |
| 101117691 | LOC101117691 | 0.267038877  | 0.455755875 | 0.715098135  | 0.020092014 |
| 101107589 | GRAP2        | 0.466037999  | 0.174597541 | 0.715024585  | 0.020110791 |
| 101107250 | MBLAC1       | 0.123619217  | 0.733677645 | 0.550994316  | 0.098785501 |
| 101122601 | LOC101122601 | 0.57323445   | 0.083212492 | 0.71328498   | 0.020558446 |
| 101113644 | PDXDC1       | 0.121702772  | 0.737683473 | -0.671409338 | 0.033516509 |
| 101121321 | ELF4         | 0.120415876  | 0.740376594 | 0.685044443  | 0.028818673 |
| 105613835 | -            | 0.120001639  | 0.74124402  | 0.364706313  | 0.300119732 |
| 101118252 | -            | 0.119849215  | 0.741563267 | 0.580155746  | 0.078711106 |
| 106991184 | -            | 0.119785396  | 0.741696946 | 0.650261167  | 0.041788569 |
| 101114040 | SFMBT2       | 0.118735872  | 0.743896204 | 0.673148974  | 0.032890116 |
| 105604629 | LOC105604629 | -0.116121944 | 0.749380863 | -0.737742885 | 0.014867876 |
| 106990804 | -            | 0.114865869  | 0.752020034 | 0.643506408  | 0.044694704 |
| 105602642 | -            | 0.085360838  | 0.814627809 | 0.71088882   | 0.021186258 |
| 101112473 | REXO4        | 0.591461091  | 0.071702835 | 0.710812305  | 0.02120652  |
| 105613124 | -            | 0.110416434  | 0.761387327 | 0.65021495   | 0.04180801  |
| 101116007 | COL17A1      | 0.110327305  | 0.761575257 | -0.522579388 | 0.121211634 |
| 105616451 | LOC105616451 | -0.108789081 | 0.764820405 | -0.538369321 | 0.10839406  |
| 105604515 | C23H18orf32  | -0.108705699 | 0.764996407 | -0.839478553 | 0.002381794 |
| 105604284 | LOC105604284 | 0.107731559  | 0.767053344 | 0.665324148  | 0.0357712   |
| 101121149 | LOC101121149 | -0.106043542 | 0.770620757 | -0.599169043 | 0.067165618 |
| 101120826 | MAPK9        | -0.105607176 | 0.771543597 | -0.756248717 | 0.011369585 |
| 101121439 | MIF4GD       | 0.626243551  | 0.052728695 | 0.710538387  | 0.021279169 |
| 105601908 | ZNF248       | -0.104523728 | 0.773836014 | -0.77426685  | 0.008562527 |
| 101117505 | PDE4A        | 0.191274671  | 0.596561619 | 0.708336876  | 0.021869302 |
| 105611784 | LOC105611784 | 0.207169027  | 0.565772135 | 0.708095657  | 0.021934641 |
| 105603563 | -            | 0.098227011  | 0.787189637 | 0.649221105  | 0.042227527 |
| 101108271 | SETBP1       | -0.097135965 | 0.789508632 | -0.634238473 | 0.048897866 |
| 101114865 | MISP         | 0.309641302  | 0.383950907 | 0.708084023  | 0.021937796 |
| 100302317 | ARL8B        | -0.096334873 | 0.791212283 | -0.596382422 | 0.068783623 |
| 101122169 | RAB33A       | 0.095852445  | 0.792238629 | 0.639254529  | 0.046591692 |
| 101115912 | TRAK1        | -0.095170146 | 0.793690683 | -0.562648134 | 0.090412398 |
| 105604729 | -            | 0.094991154  | 0.794071705 | 0.564990305  | 0.088786375 |

|           |              |              |             |              |             |
|-----------|--------------|--------------|-------------|--------------|-------------|
| 101118891 | CACNG6       | 0.09466113   | 0.794774332 | 0.565113304  | 0.088701506 |
| 106991845 | LOC106991845 | -0.094061516 | 0.796051261 | -0.669281714 | 0.034293544 |
| 101102311 | TBCK         | -0.093986961 | 0.796210063 | -0.756800936 | 0.011275095 |
| 101114422 | TSSK3        | 0.093353509  | 0.797559585 | 0.348972548  | 0.32299212  |
| 101113303 | CDHR1        | 0.09275042   | 0.798844868 | 0.566175864  | 0.087970507 |
| 101105706 | FAM204A      | 0.090675207  | 0.803270803 | -0.593189209 | 0.070668743 |
| 101107532 | LOC101107532 | -0.089880971 | 0.80496606  | -0.316773987 | 0.372504367 |
| 101117994 | LOC101117994 | 0.089274892  | 0.806260198 | 0.637189498  | 0.04753211  |
| 780463    | LOC780463    | 0.089274892  | 0.806260198 | 0.637189498  | 0.04753211  |
| 101103064 | RBM22        | -0.088871725 | 0.807121301 | -0.778888759 | 0.007930216 |
| 105606624 | -            | 0.088841461  | 0.807185947 | 0.652267644  | 0.040950418 |
| 105605118 | LOC105605118 | 0.088841461  | 0.807185947 | 0.652267644  | 0.040950418 |
| 101103235 | PRDM6        | 0.309641302  | 0.383950907 | 0.708084023  | 0.021937796 |
| 105609820 | LOC105609820 | 0.086971802  | 0.811181738 | 0.405990632  | 0.244371453 |
| 105606960 | TRNP1        | -0.086649498 | 0.811870958 | 0.660999264  | 0.037434606 |
| 101115884 | SLC10A5      | -0.086374039 | 0.812460096 | -0.749086116 | 0.01264607  |
| 105606122 | IQSEC1       | 0.309641302  | 0.383950907 | 0.708084023  | 0.021937796 |
| 101112817 | PTPRS        | 0.309641302  | 0.383950907 | 0.708084023  | 0.021937796 |
| 554261    | TLR1         | -0.084774634 | 0.815882492 | -0.677741523 | 0.031274767 |
| 101107853 | CCDC184      | -0.083185189 | 0.819286355 | 0.491122833  | 0.149451312 |
| 101119745 | LOC101119745 | -0.081189687 | 0.823563649 | 0.616444968  | 0.057688863 |
| 100913157 | ILK          | 0.364965689  | 0.299750094 | 0.706894173  | 0.022262092 |
| 101104176 | LOC101104176 | -0.078898929 | 0.828478976 | 0.381851101  | 0.276210451 |
| 105608797 | LOC105608797 | 0.078061611  | 0.830276972 | 0.678667544  | 0.030955728 |
| 105602485 | -            | 0.078061611  | 0.830276972 | 0.678667544  | 0.030955728 |
| 101111323 | STAB1        | 0.078061611  | 0.830276972 | 0.678667544  | 0.030955728 |
| 105606082 | -            | 0.078061611  | 0.830276972 | 0.678667544  | 0.030955728 |
| 101113356 | RINL         | -0.074018365 | 0.838969002 | -0.78930307  | 0.006627708 |
| 101107048 | VSIG10       | -0.073635653 | 0.83979257  | -0.688483176 | 0.027709163 |
| 101123271 | ACADL        | 0.073231032  | 0.840663437 | 0.359690646  | 0.307315105 |
| 105605926 | LOC105605926 | -0.07253573  | 0.8421603   | 0.698463357  | 0.024655065 |
| 105602696 | LOC105602696 | 0.070498138  | 0.846549485 | 0.63002877   | 0.050891026 |
| 101122904 | LOC101122904 | 0.069250566  | 0.84923877  | 0.568429714  | 0.086432761 |

|           |              |              |             |              |             |
|-----------|--------------|--------------|-------------|--------------|-------------|
| 101122241 | HPS3         | 0.069156102  | 0.849442456 | -0.772883261 | 0.008758537 |
| 101117599 | DVL2         | -0.069065296 | 0.849638261 | -0.392857318 | 0.261427129 |
| 105609819 | -            | 0.223036041  | 0.535663039 | 0.706610276  | 0.022339953 |
| 101102978 | CCDC130      | 0.441896761  | 0.201023478 | 0.706576635  | 0.022349192 |
| 101102474 | GGCT         | 0.063944616  | 0.860691703 | -0.593917328 | 0.070235969 |
| 105616771 | -            | 0.471489936  | 0.168932305 | 0.706027236  | 0.022500446 |
| 101108245 | DEF8         | -0.061165108 | 0.866700767 | -0.431078881 | 0.213575251 |
| 101119485 | C11H17orf67  | -0.060542997 | 0.868046573 | 0.398451107  | 0.254084643 |
| 101108368 | PSMD14       | 0.057551589  | 0.874522055 | -0.697627976 | 0.024901388 |
| 101107746 | RAB13        | 0.055500836  | 0.878965209 | 0.480574704  | 0.15973914  |
| 101116931 | RPS16        | 0.216664687  | 0.54767543  | 0.705685997  | 0.022594746 |
| 101118346 | PUS10        | 0.053721196  | 0.882823442 | -0.7445542   | 0.013503665 |
| 101116936 | BICDL1       | 0.496938831  | 0.143955593 | 0.705550841  | 0.022632171 |
| 101121560 | ATG3         | 0.052553313  | 0.885356606 | -0.661874694 | 0.037093774 |
| 105604766 | LOC105604766 | 0.050436261  | 0.889950909 | 0.438291749  | 0.205157495 |
| 100500777 | MAPRE1       | 0.049573568  | 0.891823928 | -0.568779543 | 0.086195639 |
| 101108383 | KRBA1        | 0.046601319  | 0.898280709 | 0.678407736  | 0.031045014 |
| 101117042 | HIP1         | 0.55395093   | 0.096616426 | 0.70519823   | 0.022730011 |
| 101106867 | BPIFB6       | 0.239721721  | 0.504718836 | 0.704667475  | 0.022877829 |
| 105601868 | ARPC4        | -0.045171266 | 0.901389231 | 0.676319517  | 0.03176903  |
| 101120954 | RHBDD3       | 0.25689159   | 0.473689257 | 0.704581656  | 0.022901791 |
| 105605809 | LOC105605809 | 0.330955547  | 0.350256382 | 0.704151457  | 0.023022175 |
| 105613831 | LOC105613831 | 0.042314323  | 0.907602974 | 0.509225311  | 0.132756434 |
| 101109027 | LOC101109027 | -0.041242613 | 0.909935085 | -0.533620494 | 0.112154807 |
| 101102507 | CRISPLD2     | -0.040400104 | 0.911768874 | 0.678659093  | 0.03095863  |
| 101117702 | MCEE         | 0.039012795  | 0.914789281 | -0.60042715  | 0.066443349 |
| 101122279 | RUFY3        | 0.038873895  | 0.915091745 | -0.701900013 | 0.023659312 |
| 101120656 | LRP1         | -0.128738486 | 0.723005713 | 0.702982583  | 0.023351462 |
| 101113111 | LOC101113111 | 0.50997517   | 0.132090909 | 0.702113715  | 0.023598321 |
| 101111303 | LOC101111303 | 0.259193666  | 0.469593914 | 0.702107263  | 0.023600161 |
| 105610080 | LOC105610080 | 0.036430612  | 0.920413717 | 0.577337709  | 0.080524379 |
| 101114640 | TRIM21       | -0.035605873 | 0.922210823 | -0.720745733 | 0.018686117 |
| 100302066 | RAB4A        | 0.035317492  | 0.922839279 | 0.491258874  | 0.149321331 |



|           |              |              |             |              |             |
|-----------|--------------|--------------|-------------|--------------|-------------|
| 101102689 | SLC16A12     | 0.035110033  | 0.92329141  | -0.605699147 | 0.063472056 |
| 106991757 | ARIH2OS      | 0.032964649  | 0.927968138 | 0.62118657   | 0.055251748 |
| 101114808 | HARBI1       | -0.031690598 | 0.930746397 | -0.711574695 | 0.021005221 |
| 101107328 | SLC29A3      | -0.030652249 | 0.933011168 | -0.675853795 | 0.031932053 |
| 105615270 | LOC105615270 | 0.028860313  | 0.936920623 | 0.611045437  | 0.060549337 |
| 101122777 | YBX3         | -0.02858923  | 0.93751215  | -0.516485456 | 0.126399281 |
| 101109079 | LOC101109079 | -0.026804564 | 0.941407126 | -0.623388232 | 0.054143676 |
| 105609438 | LOC105609438 | -0.024263659 | 0.946954482 | -0.722655835 | 0.018226479 |
| 101107192 | TRIM52       | 0.022316205  | 0.951207605 | -0.626720867 | 0.052494576 |
| 101107062 | TYW3         | 0.022016177  | 0.951862949 | -0.764169111 | 0.010066542 |
| 105609069 | -            | 0.021948836  | 0.952010046 | 0.497276423  | 0.143640438 |
| 101118173 | TBC1D13      | 0.711621126  | 0.020993004 | 0.70197438   | 0.023638075 |
| 101121345 | PEAK3        | 0.020361518  | 0.95547764  | 0.668992049  | 0.034400269 |
| 106991113 | -            | 0.019983277  | 0.956304034 | 0.491182178  | 0.149394602 |
| 101113031 | CCDC58       | 0.018400402  | 0.959762745 | -0.759558003 | 0.01081157  |
| 101106433 | THBS1        | -0.016639764 | 0.963610593 | 0.361336626  | 0.304943868 |
| 101103179 | TRIM6        | 0.012018215  | 0.973713951 | -0.437544218 | 0.206020829 |
| 443193    | CPT1B        | 0.010421485  | 0.977205478 | 0.587892113  | 0.073869539 |
| 101104589 | GRB7         | -0.0092811   | 0.979699343 | 0.5487043    | 0.100486599 |
| 106991913 | -            | -0.00845612  | 0.981503559 | 0.53782832   | 0.108818431 |
| 101115356 | SOX5         | -0.00789749  | 0.982725318 | -0.675590331 | 0.032024529 |
| 101116080 | LOC101116080 | -0.007544717 | 0.983496871 | -0.574892386 | 0.082119498 |
| 101110963 | PVR          | -0.007257444 | 0.984125177 | 0.523630276  | 0.12033066  |
| 101122510 | FHL2         | 0.155623118  | 0.667699933 | 0.701208346  | 0.023857455 |
| 101118748 | DUSP5        | 0.00532751   | 0.988346403 | 0.591457014  | 0.071705286 |
| 101113188 | LOC101113188 | 0.454491406  | 0.186963862 | 0.700561732  | 0.02404372  |
| 101117567 | TRIM32       | -0.002389171 | 0.994773718 | -0.299866545 | 0.39991149  |
| 101119041 | LOC101119041 | 0.001595997  | 0.996508766 | 0.625480005  | 0.053104645 |
| 100034668 | CLN5         | 0.000178924  | 0.999608603 | -0.81590446  | 0.003997955 |
